# Supplementary material for: New N-acyl Thiourea Derivatives: Synthesis, Standardized Quantification Method and In Vitro Evaluation of Potential Biological Activities
Source: MDPI journal article supplement (doi:10.3390/antibiotics12050807), 2023-04-25
Supplement: s1 [file s1]

**Quantitative determination of**  
***compound 1d***

**- Validation of the analytical method -**

Validation parameters:

- Specificity
- Precision 1
- Precision 2
- LOD – LOQ
- Linearity
- Range
- Accuracy

## **Quantitative determination of**

***compound 1d***

### **- Validation of the analytical method -**

Validation parameters:

- **Specificity**
- Precision 1
- Precision 2
- LOD – LOQ
- Linearity
- Range
- Accuracy

## Specificity\_1d\_Report

Reported by User: Roxana Roman (Roxana\_Roman)  
 Acquisition Server: Waters7  
 Project Name: Test  
 Sample Set Name: Precision 1\_Accuracy\_PyridineM  
 Code column: Inertsil ODS-3, 4,6\*250 mm, 5 um

### SAMPLE INFORMATION

|                   |                           |                     |                                |
|-------------------|---------------------------|---------------------|--------------------------------|
| Sample Name:      | Methyl-pyridine 30 ug/ mL | Date Acquired:      | 11.06.2022 18:49:07            |
| Sample Type:      | Standard                  | Acq. Method Set:    | Precision 1_Accuracy_PyridineM |
| Vial:             | 25                        | Date Processed:     | 16.02.2023 13:11:06            |
| Injection #:      | 1                         | Processing Method:  | Precision 1_Accuracy_PyridineM |
| Injection Volume: | 100,00 ul                 | Channel Name:       | Extract 275,0                  |
| Run Time:         | 20,0 Minutes              | Proc. Chnl. Descr.: | PDA 275,0 nm, Smoothed by 25   |
| Acquired By:      | Roxana_Roman              |                     |                                |

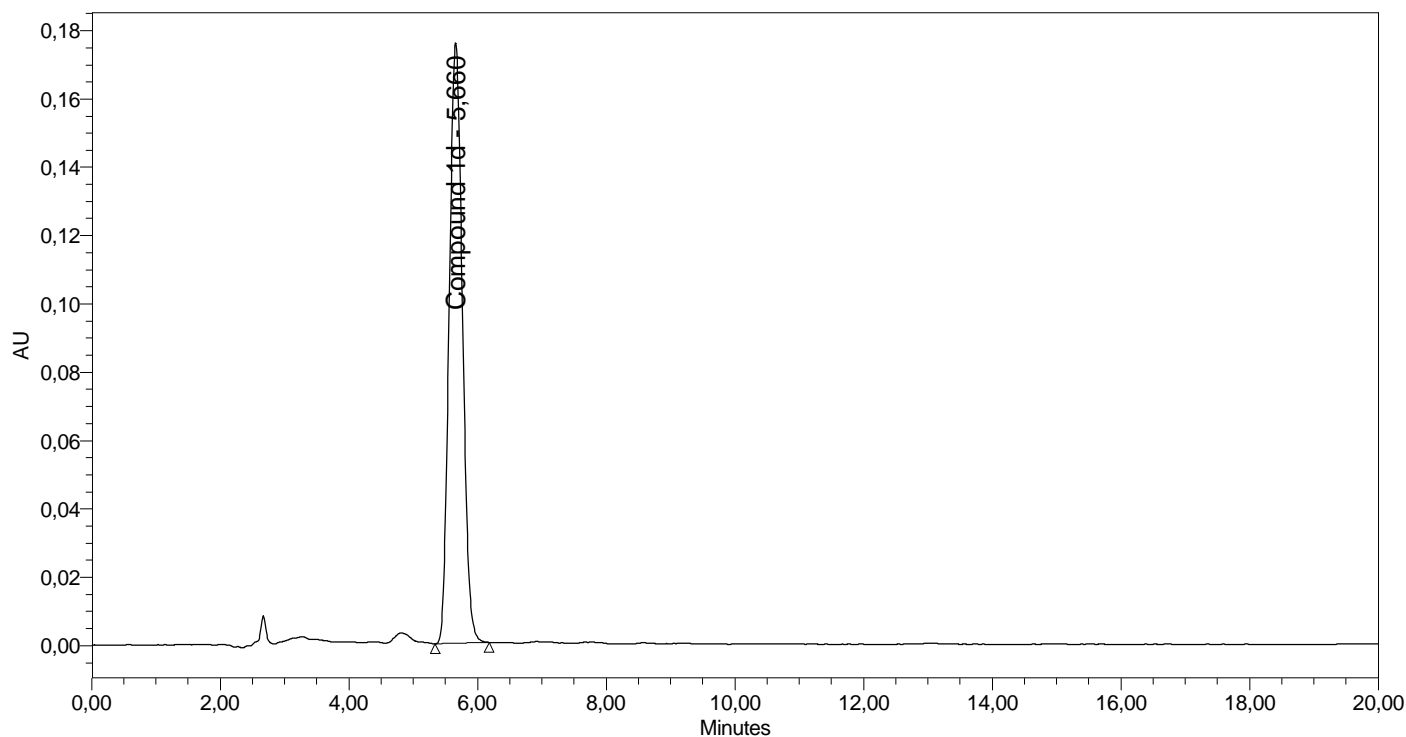

|   | Peak Name   | RT    | Area    | Height (μV) | Symmetry Factor | Purity1 Angle | Purity1 Threshold | Purity1 Flag |
|---|-------------|-------|---------|-------------|-----------------|---------------|-------------------|--------------|
| 1 | Compound 1d | 5,660 | 2504606 | 175677      | 1,09            | 0,082         | 0,279             | No           |

|   |                 |
|---|-----------------|
|   | USP Plate Count |
| 1 | 3596            |

## Specificity\_1d\_Report

Reported by User: Roxana Roman (Roxana\_Roman)  
 Acquisition Server: Waters7  
 Project Name: Test  
 Sample Set Name: Precision 1\_Accuracy\_PyridineM  
 Code column: Inertsil ODS-3, 4,6\*250 mm, 5 um

### SAMPLE INFORMATION

|                   |                           |                     |                                |
|-------------------|---------------------------|---------------------|--------------------------------|
| Sample Name:      | Methyl-pyridine 30 ug/ mL | Date Acquired:      | 11.06.2022 19:09:51            |
| Sample Type:      | Standard                  | Acq. Method Set:    | Precision 1_Accuracy_PyridineM |
| Vial:             | 25                        | Date Processed:     | 16.02.2023 13:11:08            |
| Injection #:      | 2                         | Processing Method:  | Precision 1_Accuracy_PyridineM |
| Injection Volume: | 100,00 ul                 | Channel Name:       | Extract 275,0                  |
| Run Time:         | 20,0 Minutes              | Proc. Chnl. Descr.: | PDA 275,0 nm, Smoothed by 25   |
| Acquired By:      | Roxana_Roman              |                     |                                |

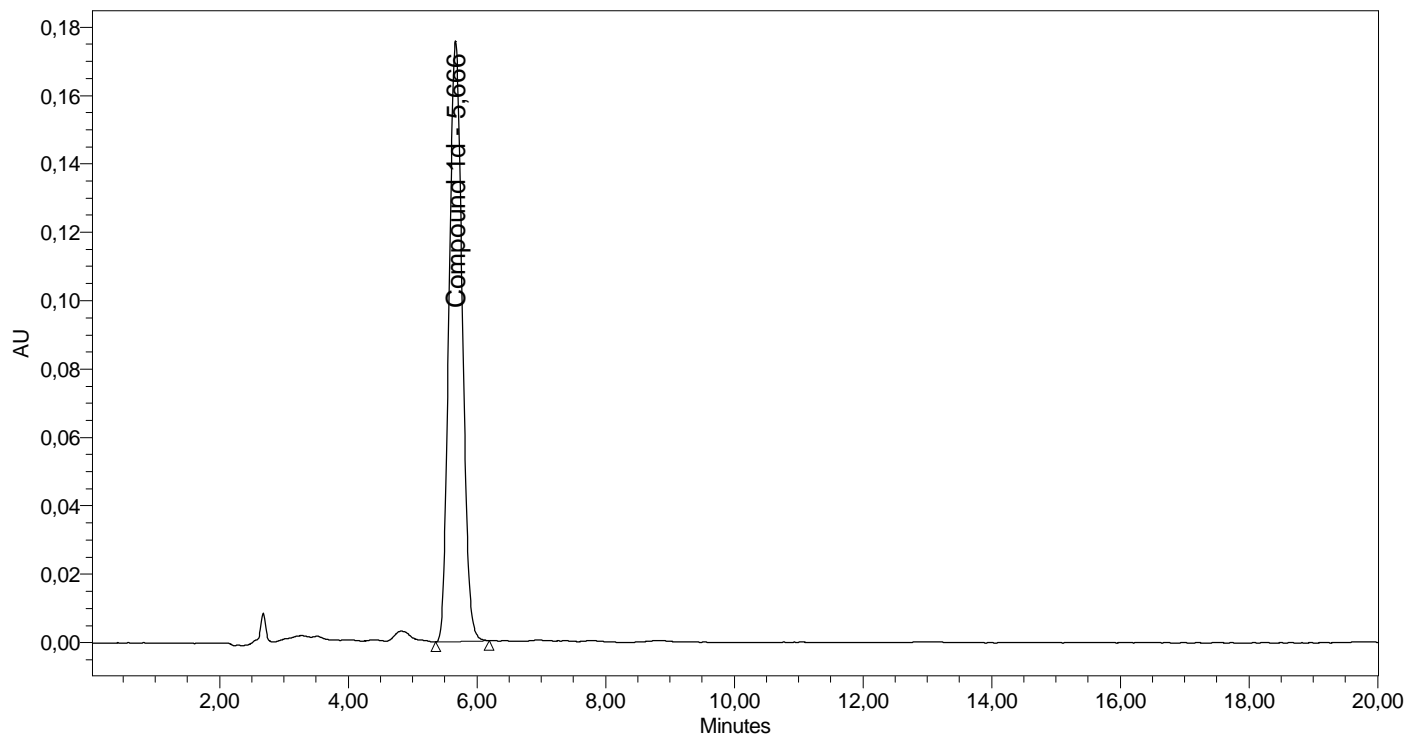

|   | Peak Name   | RT    | Area    | Height (μV) | Symmetry Factor | Purity1 Angle | Purity1 Threshold | Purity1 Flag |
|---|-------------|-------|---------|-------------|-----------------|---------------|-------------------|--------------|
| 1 | Compound 1d | 5,666 | 2511937 | 175638      | 1,09            | 0,077         | 0,278             | No           |

|   |                 |
|---|-----------------|
|   | USP Plate Count |
| 1 | 3573            |

## Specificity\_1d\_Report

Reported by User: Roxana Roman (Roxana\_Roman)  
 Acquisition Server: Waters7  
 Project Name: Test  
 Sample Set Name: Precision 1\_Accuracy\_PyridineM  
 Code column: Inertsil ODS-3, 4,6\*250 mm, 5 um

### SAMPLE INFORMATION

|                   |                           |                     |                                |
|-------------------|---------------------------|---------------------|--------------------------------|
| Sample Name:      | Methyl-pyridine 30 ug/ mL | Date Acquired:      | 11.06.2022 19:30:35            |
| Sample Type:      | Standard                  | Acq. Method Set:    | Precision 1_Accuracy_PyridineM |
| Vial:             | 25                        | Date Processed:     | 16.02.2023 13:11:09            |
| Injection #:      | 3                         | Processing Method:  | Precision 1_Accuracy_PyridineM |
| Injection Volume: | 100,00 ul                 | Channel Name:       | Extract 275,0                  |
| Run Time:         | 20,0 Minutes              | Proc. Chnl. Descr.: | PDA 275,0 nm, Smoothed by 25   |
| Acquired By:      | Roxana_Roman              |                     |                                |

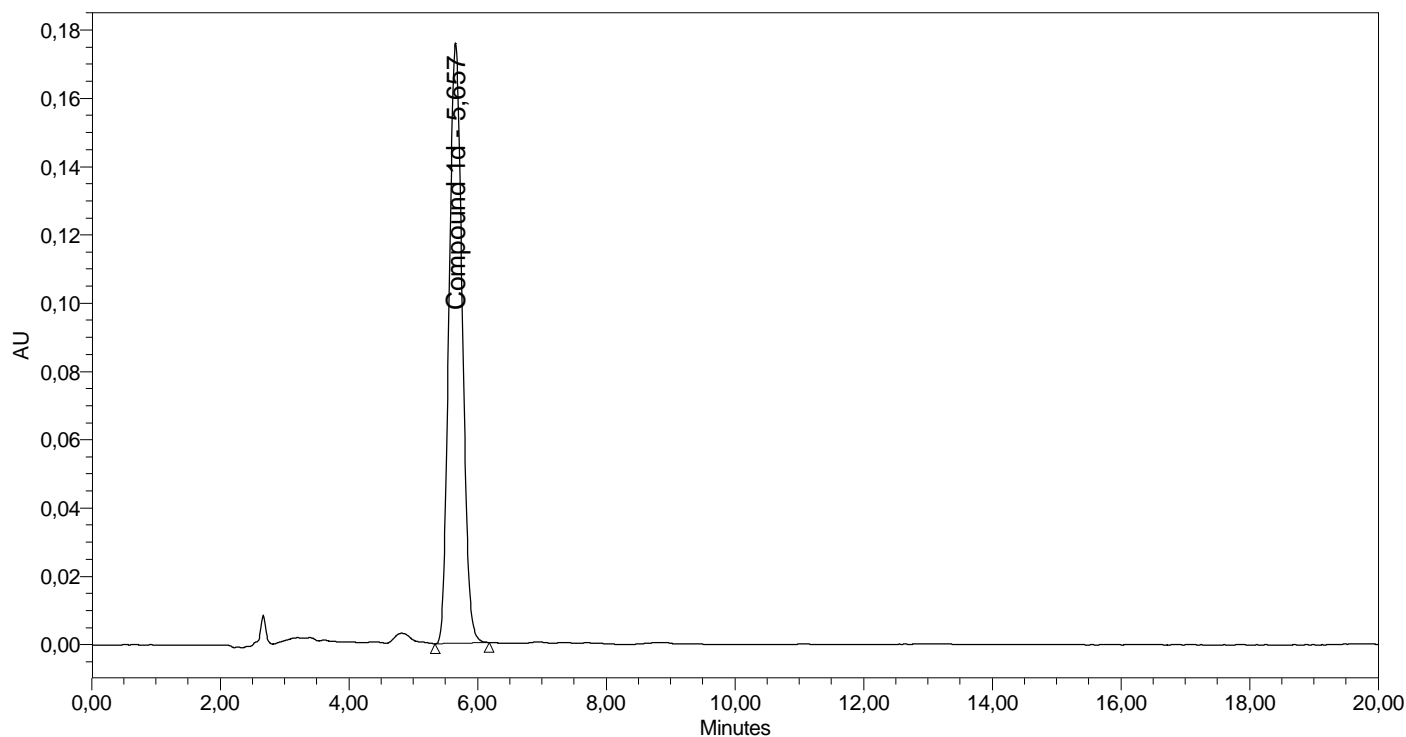

|   | Peak Name   | RT    | Area    | Height (μV) | Symmetry Factor | Purity1 Angle | Purity1 Threshold | Purity1 Flag |
|---|-------------|-------|---------|-------------|-----------------|---------------|-------------------|--------------|
| 1 | Compound 1d | 5,657 | 2512040 | 175781      | 1,09            | 0,085         | 0,280             | No           |

|   |                 |
|---|-----------------|
|   | USP Plate Count |
| 1 | 3559            |

## Specificity\_1d\_Report

Reported by User: Roxana Roman (Roxana\_Roman)  
 Acquisition Server: Waters7  
 Project Name: Test  
 Sample Set Name: Precision 1\_Accuracy\_PyridineM  
 Code column: Inertsil ODS-3, 4,6\*250 mm, 5 um

### SAMPLE INFORMATION

|                   |              |                     |                                |
|-------------------|--------------|---------------------|--------------------------------|
| Sample Name:      | Methanol     | Date Acquired:      | 11.06.2022 18:28:06            |
| Sample Type:      | Standard     | Acq. Method Set:    | Precision 1_Accuracy_PyridineM |
| Vial:             | 11           | Date Processed:     | 18.02.2023 09:25:05            |
| Injection #:      | 1            | Processing Method:  | Precision 1_Accuracy_PyridineM |
| Injection Volume: | 100,00 ul    | Channel Name:       | Extract 275,0                  |
| Run Time:         | 20,0 Minutes | Proc. Chnl. Descr.: | PDA 275,0 nm, Smoothed by 25   |
| Acquired By:      | Roxana_Roman |                     |                                |

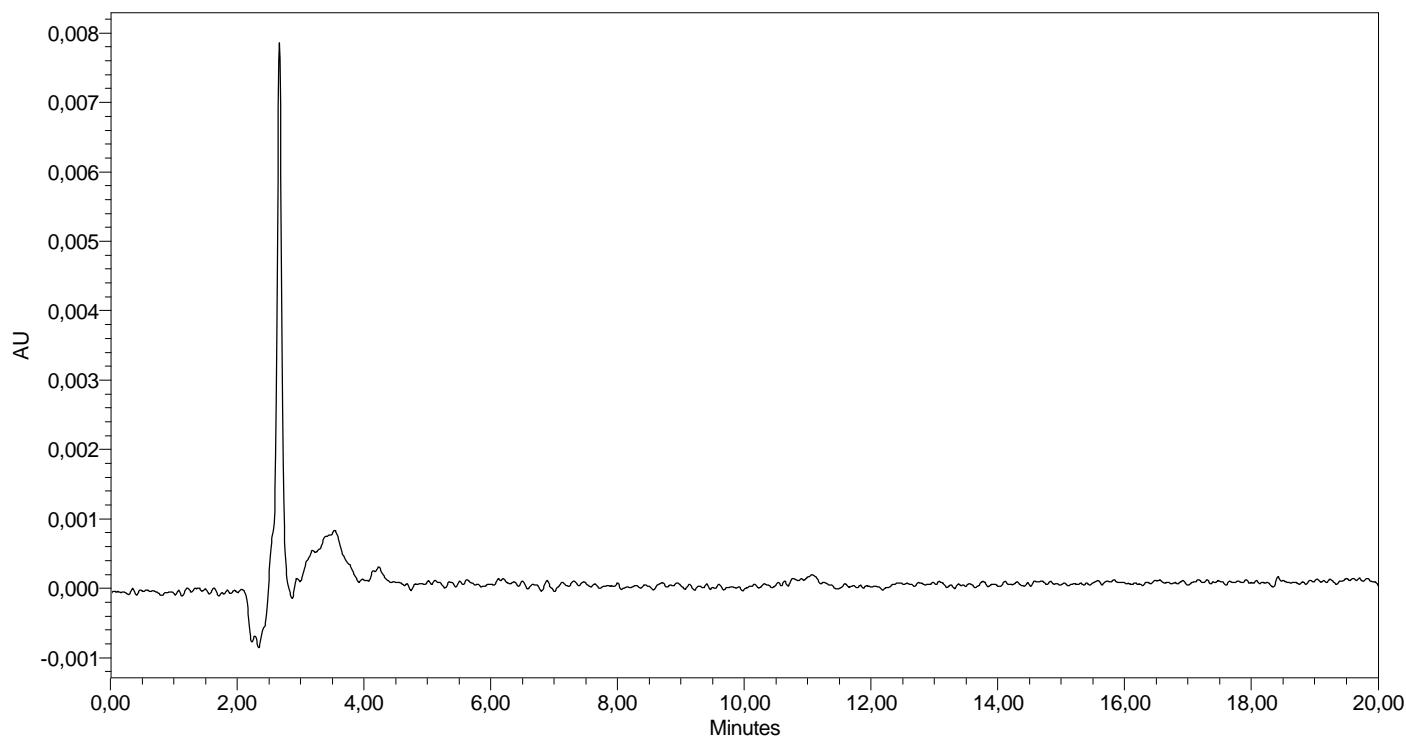

Basic LC Peaks Table group contains no data.

## Specificity\_1d\_Report

Reported by User: Roxana Roman (Roxana\_Roman)  
 Acquisition Server: Waters7  
 Project Name: Test  
 Sample Set Name: Precision 1\_Accuracy\_PyridineM  
 Code column: Inertsil ODS-3, 4,6\*250 mm, 5 um

### SAMPLE INFORMATION

|                   |                           |                     |                                |
|-------------------|---------------------------|---------------------|--------------------------------|
| Sample Name:      | Methyl-pyridine 30 ug/ mL | Date Acquired:      | 11.06.2022 22:21:21            |
| Sample Type:      | Unknown                   | Acq. Method Set:    | Precision 1_Accuracy_PyridineM |
| Vial:             | 32                        | Date Processed:     | 16.02.2023 13:12:52            |
| Injection #:      | 1                         | Processing Method:  | Precision 1_Accuracy_PyridineM |
| Injection Volume: | 100,00 ul                 | Channel Name:       | Extract 275,0                  |
| Run Time:         | 20,0 Minutes              | Proc. Chnl. Descr.: | PDA 275,0 nm, Smoothed by 25   |
| Acquired By:      | Roxana_Roman              |                     |                                |

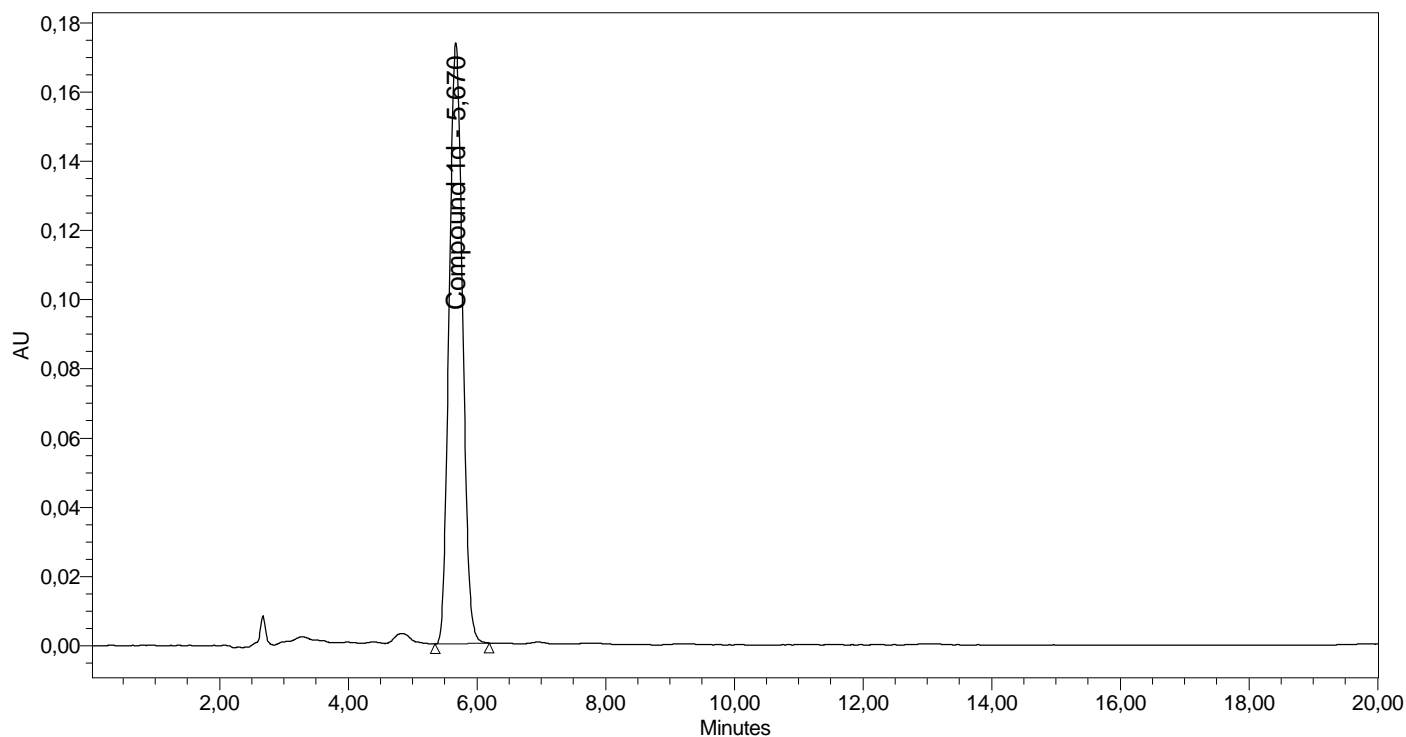

|   | Peak Name   | RT    | Area    | Height (μV) | Symmetry Factor | Purity1 Angle | Purity1 Threshold | Purity1 Flag |
|---|-------------|-------|---------|-------------|-----------------|---------------|-------------------|--------------|
| 1 | Compound 1d | 5,670 | 2518986 | 173649      | 1,07            | 0,081         | 0,279             | No           |

|   |                 |
|---|-----------------|
|   | USP Plate Count |
| 1 | 3463            |

## Specificity\_1d\_Report

Reported by User: Roxana Roman (Roxana\_Roman)  
 Acquisition Server: Waters7  
 Project Name: Test  
 Sample Set Name: Precision 1\_Accuracy\_PyridineM  
 Code column: Inertsil ODS-3, 4,6\*250 mm, 5 um

### SAMPLE INFORMATION

|                                        |                                                   |
|----------------------------------------|---------------------------------------------------|
| Sample Name: Methyl-pyridine 30 ug/ mL | Date Acquired: 11.06.2022 22:42:09                |
| Sample Type: Unknown                   | Acq. Method Set: Precision 1_Accuracy_PyridineM   |
| Vial: 33                               | Date Processed: 16.02.2023 13:13:03               |
| Injection #: 1                         | Processing Method: Precision 1_Accuracy_PyridineM |
| Injection Volume: 100,00 ul            | Channel Name: Extract 275,0                       |
| Run Time: 20,0 Minutes                 | Proc. Chnl. Descr.: PDA 275,0 nm, Smoothed by 25  |
| Acquired By: Roxana_Roman              |                                                   |

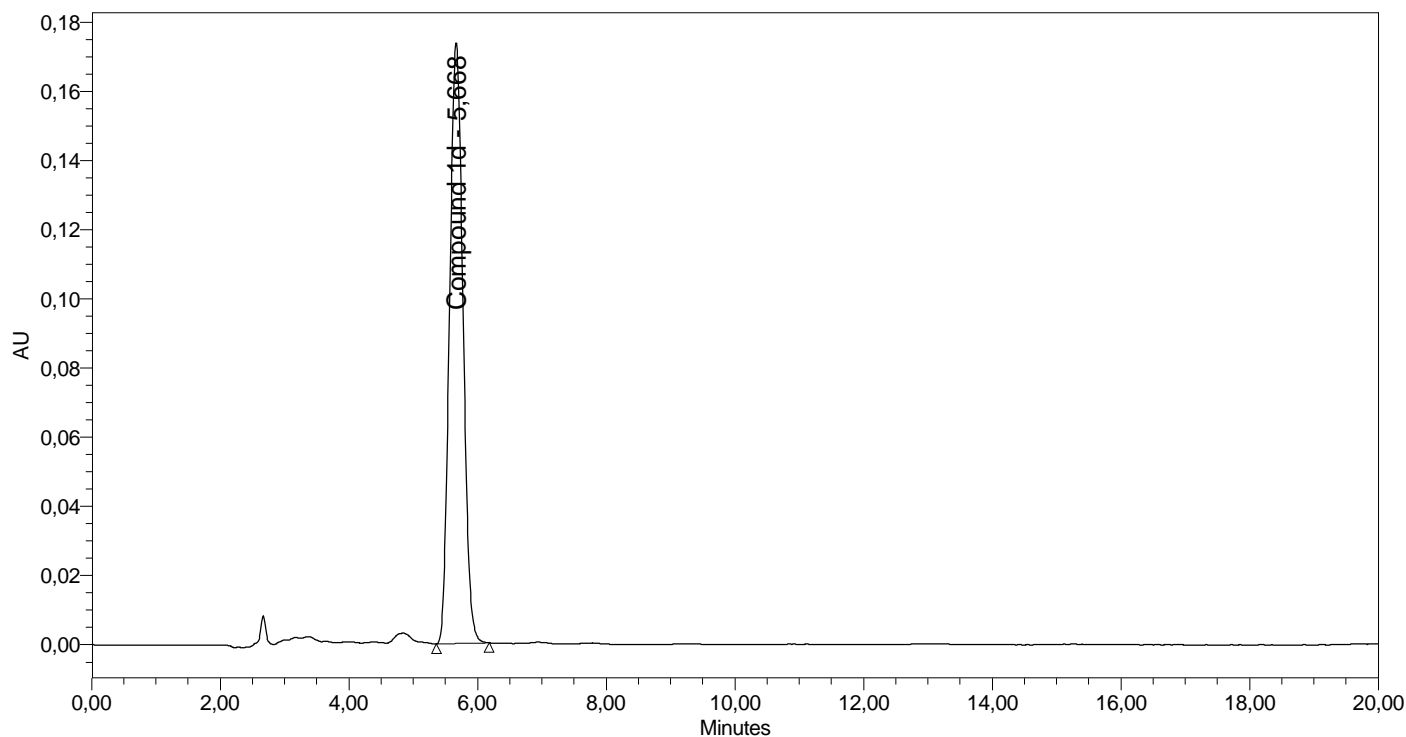

|   | Peak Name   | RT    | Area    | Height (μV) | Symmetry Factor | Purity1 Angle | Purity1 Threshold | Purity1 Flag |
|---|-------------|-------|---------|-------------|-----------------|---------------|-------------------|--------------|
| 1 | Compound 1d | 5,668 | 2510959 | 173564      | 1,08            | 0,080         | 0,280             | No           |

|   |                 |
|---|-----------------|
|   | USP Plate Count |
| 1 | 3476            |



**Quantitative determination of**  
***compound 1d***

**- Validation of the analytical method -**

Validation parameters:

- Specificity
- Precision 1
- Precision 2
- **LOD – LOQ**
- Linearity
- Range
- Accuracy

## Seria Metoxi\_1d\_LOD LOQ

Reported by User: Roxana Roman (Roxana\_Roman)  
 Acquisition Server: Waters7  
 Project Name: Test  
 Sample Set Name: LOD\_LOQ\_Linearity\_Pyridine Met  
 Code column: Inertsil ODS-3, 4,6\*250 mm, 5 um

**Calibration Plot group for Solvent peak contains no data.**

**Calibration Plot**

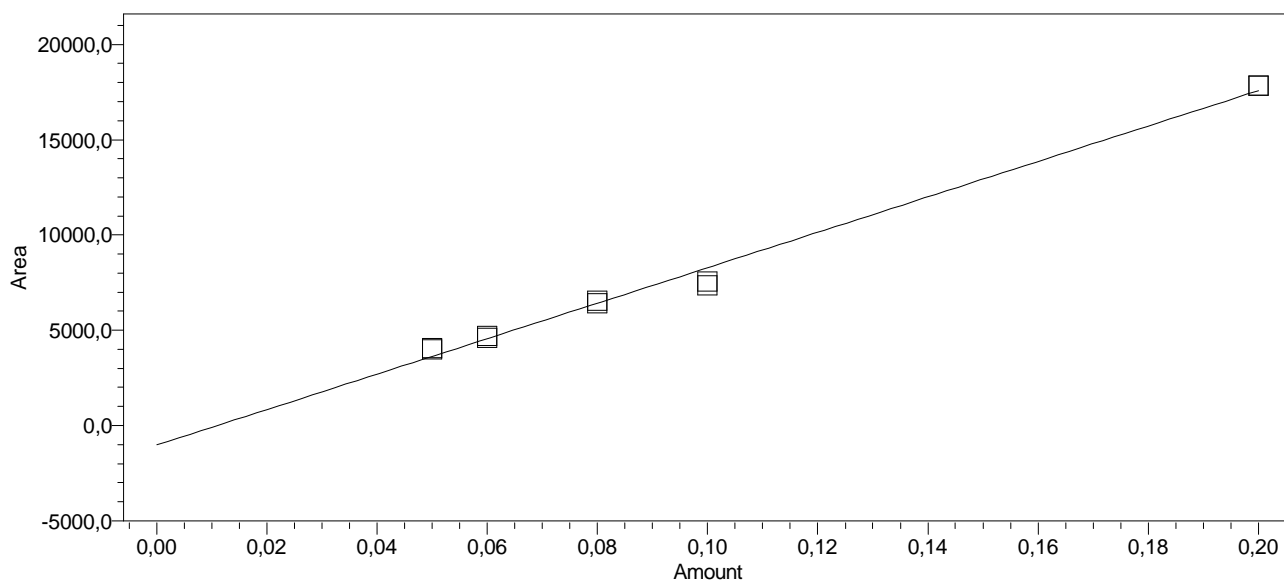

Name: Compound 1d; Processing Method: Linearity\_Pyridine\_M\_Methoxy; Fit Type: Linear (1st Order); Cal Curve Id: 4621; A: -1,028826e+003; B: 9,306863e+004; C: 0,000000e+000; D: 0,000000e+000; R<sup>2</sup>: 0,992391; Standard Error 4,903240e+002

Point Information ' Peak: Solvent peak' table contains no data.

Peak: Compound 1d

|    | Name        | Level | X Value  | Response     | Calc. Value | % Deviation | Manual | Ignore |
|----|-------------|-------|----------|--------------|-------------|-------------|--------|--------|
| 1  | Compound 1d | 5     | 0,050000 | 4071,743656  | 0,054804    | 9,609       | No     | No     |
| 2  | Compound 1d | 5     | 0,050000 | 3997,911266  | 0,054011    | 8,022       | No     | No     |
| 3  | Compound 1d | 6     | 0,060000 | 4710,043738  | 0,061663    | 2,771       | No     | No     |
| 4  | Compound 1d | 6     | 0,060000 | 4604,067650  | 0,060524    | 0,873       | No     | No     |
| 5  | Compound 1d | 8     | 0,080000 | 6552,166667  | 0,081456    | 1,820       | No     | No     |
| 6  | Compound 1d | 8     | 0,080000 | 6405,660466  | 0,079882    | -0,148      | No     | No     |
| 7  | Compound 1d | 10    | 0,100000 | 7346,426958  | 0,089990    | -10,010     | No     | No     |
| 8  | Compound 1d | 10    | 0,100000 | 7544,638514  | 0,092120    | -7,880      | No     | No     |
| 9  | Compound 1d | 20    | 0,200000 | 17837,293510 | 0,202712    | 1,356       | No     | No     |
| 10 | Compound 1d | 20    | 0,200000 | 17849,038191 | 0,202838    | 1,419       | No     | No     |

## LOD LOQ\_1d\_Report

Reported by User: Roxana Roman (Roxana\_Roman)  
 Acquisition Server: Waters7  
 Project Name: Test  
 Sample Set Name: LOD\_LOQ\_Linearity\_Pyridine Met  
 Code column: Inertsil ODS-3, 4,6\*250 mm, 5 um

### SAMPLE INFORMATION

|                   |                      |                     |                                |
|-------------------|----------------------|---------------------|--------------------------------|
| Sample Name:      | Solution 0.05 ug/ mL | Date Acquired:      | 11.06.2022 12:45:55            |
| Sample Type:      | Standard             | Acq. Method Set:    | LOD_LOQ_Linearity_Pyridine_Met |
| Vial:             | 3                    | Date Processed:     | 11.02.2023 13:10:22            |
| Injection #:      | 1                    | Processing Method:  | Linearity_Pyridine_M_Methoxy   |
| Injection Volume: | 100,00 ul            | Channel Name:       | Extract 275,0                  |
| Run Time:         | 20,0 Minutes         | Proc. Chnl. Descr.: | PDA 275,0 nm, Smoothed by 25   |
| Acquired By:      | Roxana_Roman         |                     |                                |

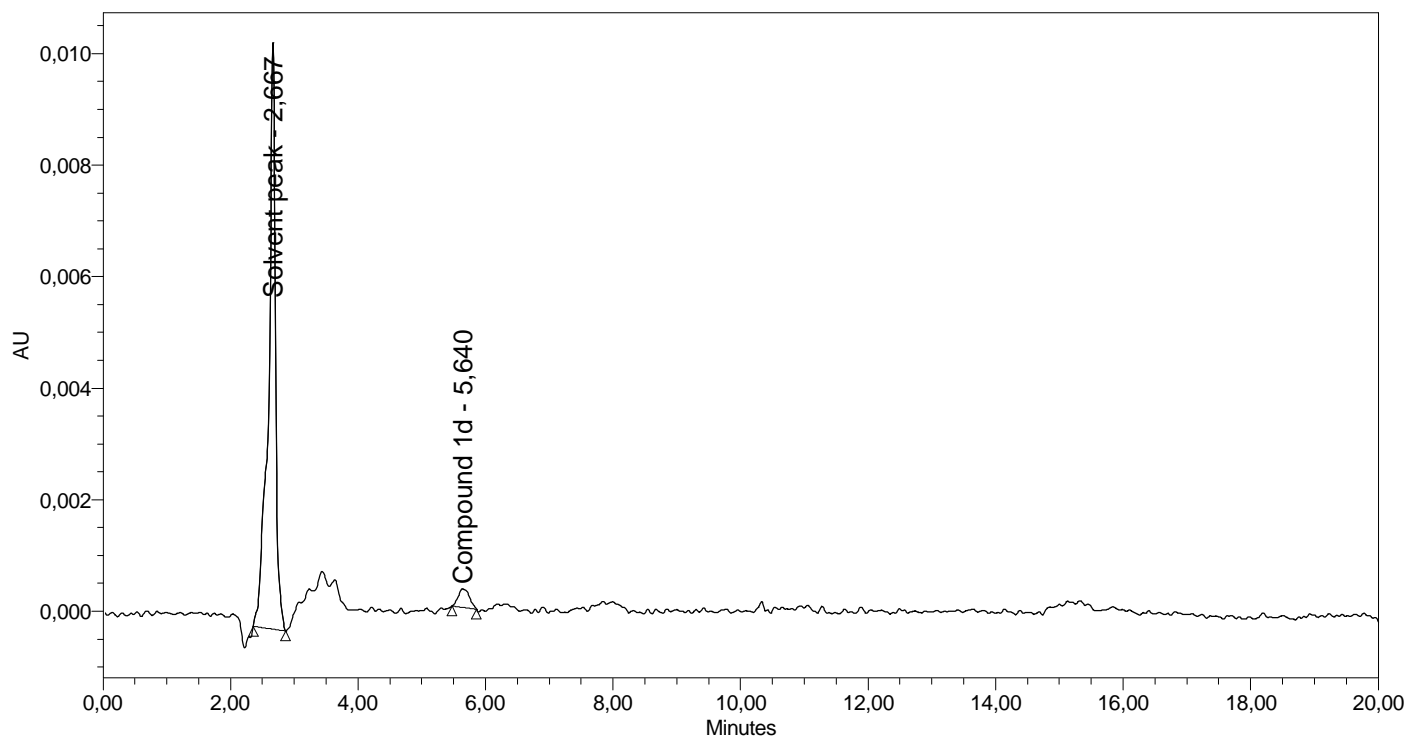

|   | Peak Name    | RT    | Area  | Height (μV) | Level |
|---|--------------|-------|-------|-------------|-------|
| 1 | Solvent peak | 2,667 | 81106 | 10502       | 5     |
| 2 | Compound 1d  | 5,640 | 4072  | 328         | 5     |

## LOD LOQ\_1d\_Report

Reported by User: Roxana Roman (Roxana\_Roman)  
 Acquisition Server: Waters7  
 Project Name: Test  
 Sample Set Name: LOD\_LOQ\_Linearity\_Pyridine Met  
 Code column: Inertsil ODS-3, 4,6\*250 mm, 5 um

### SAMPLE INFORMATION

|                   |                      |                     |                                |
|-------------------|----------------------|---------------------|--------------------------------|
| Sample Name:      | Solution 0.05 ug/ mL | Date Acquired:      | 11.06.2022 13:06:54            |
| Sample Type:      | Standard             | Acq. Method Set:    | LOD_LOQ_Linearity_Pyridine_Met |
| Vial:             | 3                    | Date Processed:     | 11.02.2023 13:10:39            |
| Injection #:      | 2                    | Processing Method:  | Linearity_Pyridine_M_Methoxy   |
| Injection Volume: | 100,00 ul            | Channel Name:       | Extract 275,0                  |
| Run Time:         | 20,0 Minutes         | Proc. Chnl. Descr.: | PDA 275,0 nm, Smoothed by 25   |
| Acquired By:      | Roxana_Roman         |                     |                                |

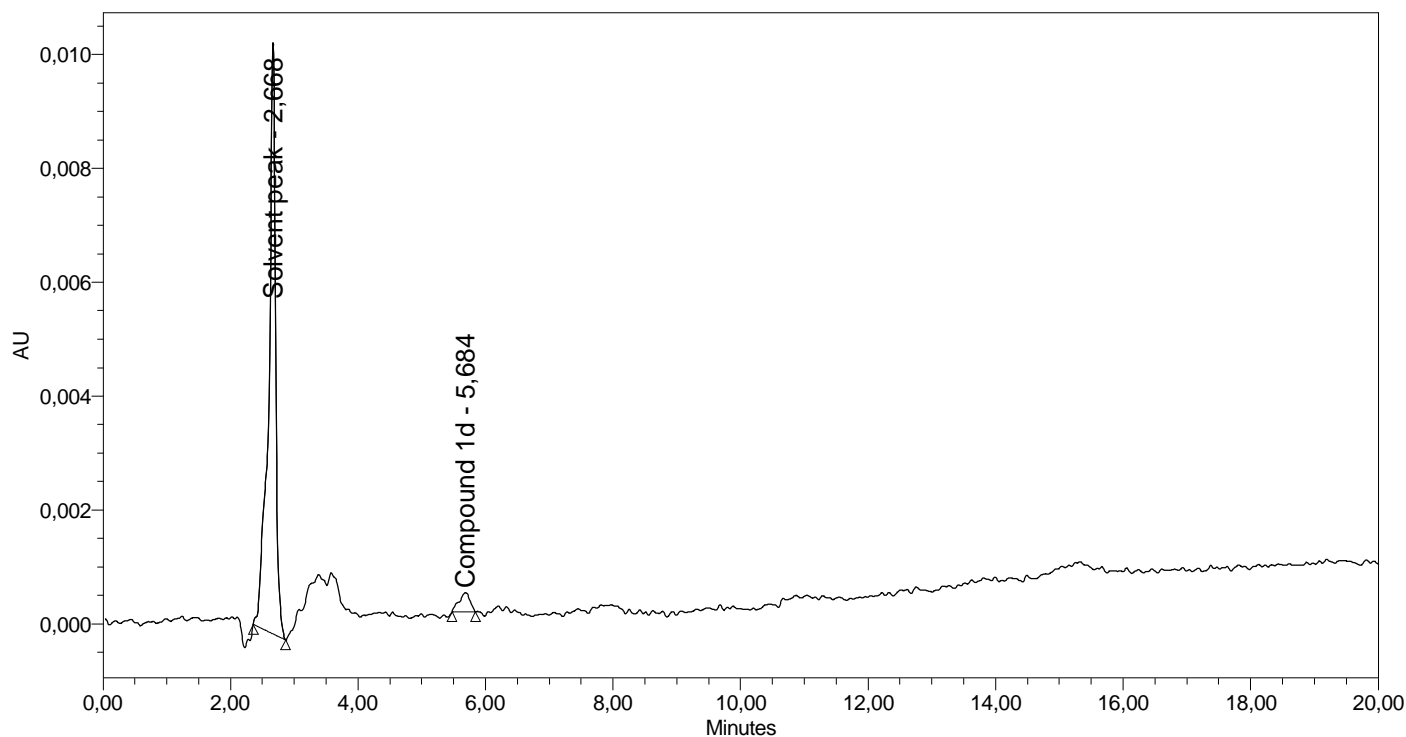

|   | Peak Name    | RT    | Area  | Height (μV) | Level |
|---|--------------|-------|-------|-------------|-------|
| 1 | Solvent peak | 2,668 | 79221 | 10379       | 5     |
| 2 | Compound 1d  | 5,684 | 3998  | 337         | 5     |

## LOD LOQ\_1d\_Report

Reported by User: Roxana Roman (Roxana\_Roman)  
 Acquisition Server: Waters7  
 Project Name: Test  
 Sample Set Name: LOD\_LOQ\_Linearity\_Pyridine Met  
 Code column: Inertsil ODS-3, 4,6\*250 mm, 5 um

### SAMPLE INFORMATION

|                   |                      |                     |                                |
|-------------------|----------------------|---------------------|--------------------------------|
| Sample Name:      | Solution 0.06 ug/ mL | Date Acquired:      | 11.06.2022 12:03:47            |
| Sample Type:      | Standard             | Acq. Method Set:    | LOD_LOQ_Linearity_Pyridine_Met |
| Vial:             | 4                    | Date Processed:     | 11.02.2023 13:09:51            |
| Injection #:      | 1                    | Processing Method:  | Linearity_Pyridine_M_Methoxy   |
| Injection Volume: | 100,00 ul            | Channel Name:       | Extract 275,0                  |
| Run Time:         | 20,0 Minutes         | Proc. Chnl. Descr.: | PDA 275,0 nm, Smoothed by 25   |
| Acquired By:      | Roxana_Roman         |                     |                                |

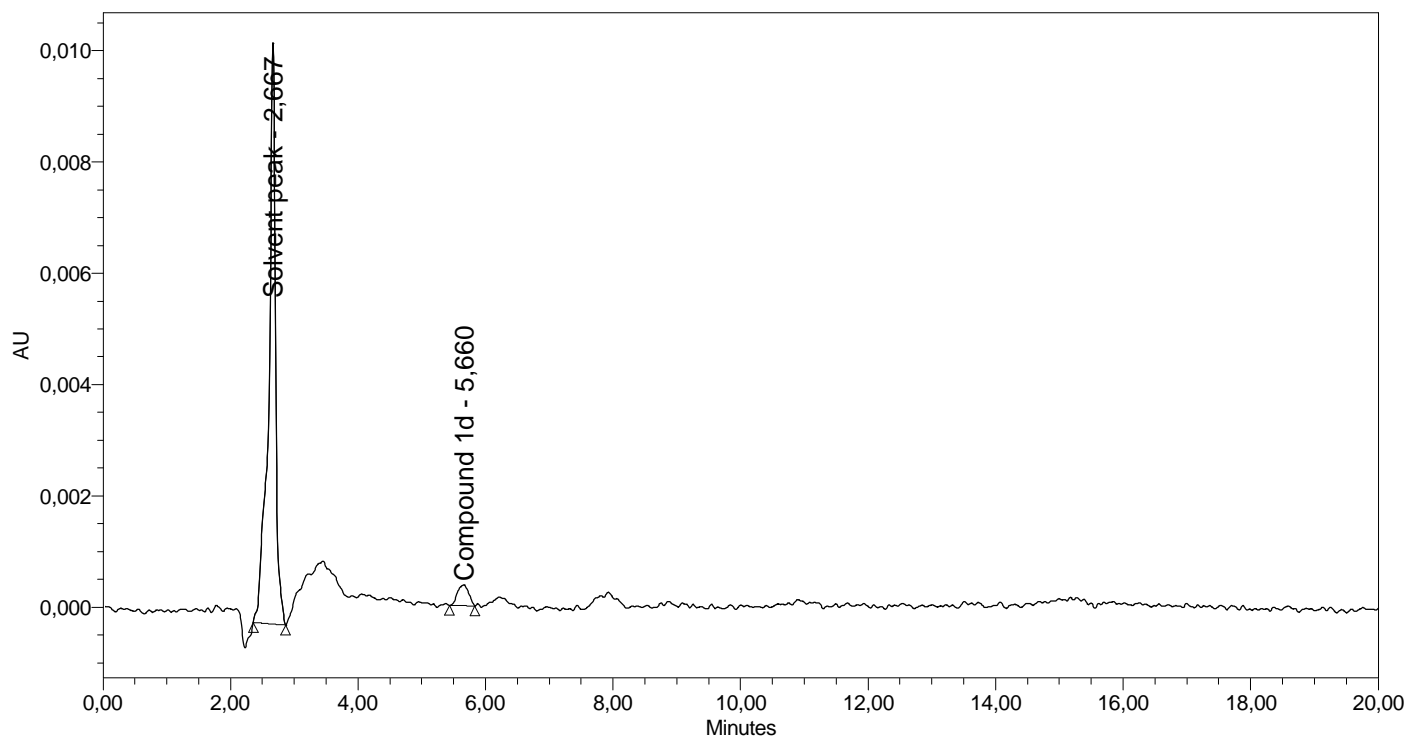

|   | Peak Name    | RT    | Area  | Height (μV) | Level |
|---|--------------|-------|-------|-------------|-------|
| 1 | Solvent peak | 2,667 | 79126 | 10433       | 6     |
| 2 | Compound 1d  | 5,660 | 4604  | 378         | 6     |

## LOD LOQ\_1d\_Report

Reported by User: Roxana Roman (Roxana\_Roman)  
 Acquisition Server: Waters7  
 Project Name: Test  
 Sample Set Name: LOD\_LOQ\_Linearity\_Pyridine Met  
 Code column: Inertsil ODS-3, 4,6\*250 mm, 5 um

### SAMPLE INFORMATION

|                   |                      |                     |                                |
|-------------------|----------------------|---------------------|--------------------------------|
| Sample Name:      | Solution 0.06 ug/ mL | Date Acquired:      | 11.06.2022 12:24:32            |
| Sample Type:      | Standard             | Acq. Method Set:    | LOD_LOQ_Linearity_Pyridine_Met |
| Vial:             | 4                    | Date Processed:     | 11.02.2023 13:09:39            |
| Injection #:      | 2                    | Processing Method:  | Linearity_Pyridine_M_Methoxy   |
| Injection Volume: | 100,00 ul            | Channel Name:       | Extract 275,0                  |
| Run Time:         | 20,0 Minutes         | Proc. Chnl. Descr.: | PDA 275,0 nm, Smoothed by 25   |
| Acquired By:      | Roxana_Roman         |                     |                                |

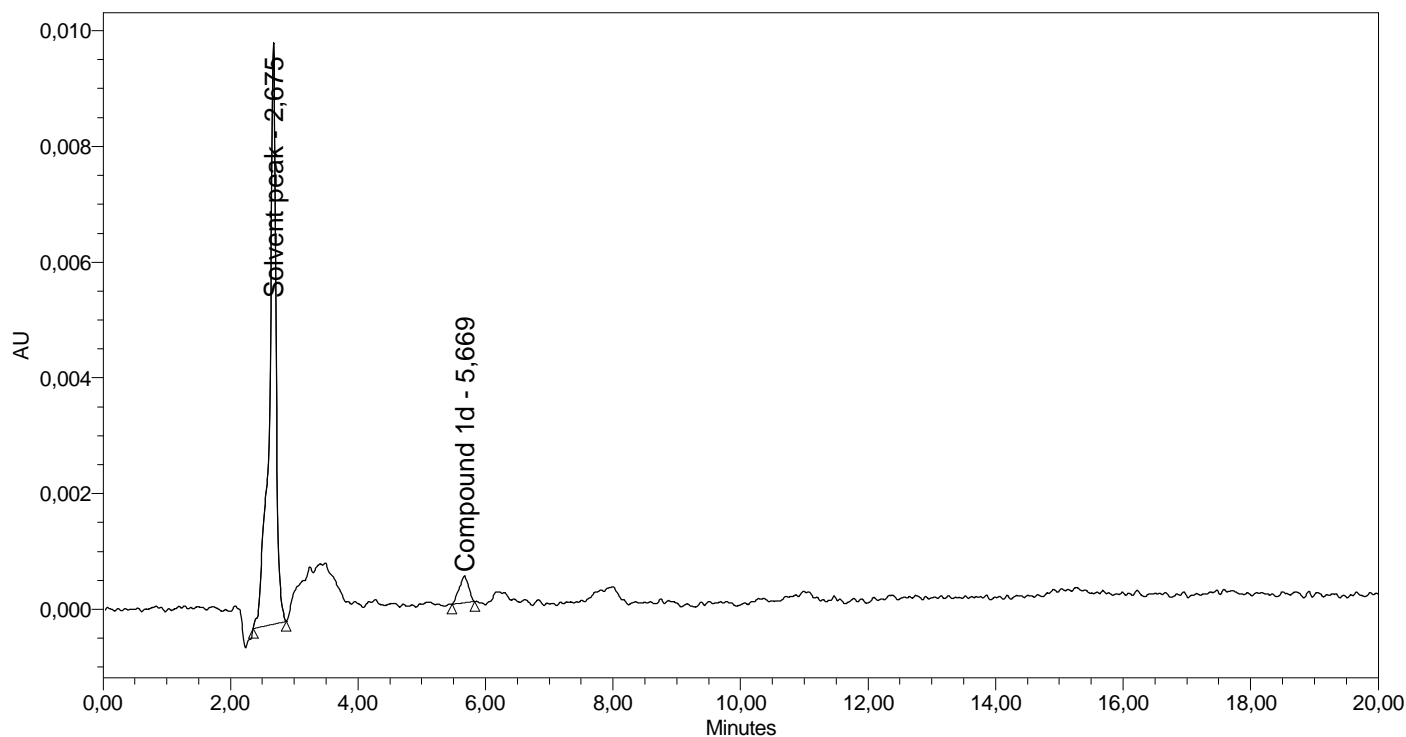

|   | Peak Name    | RT    | Area  | Height (μV) | Level |
|---|--------------|-------|-------|-------------|-------|
| 1 | Solvent peak | 2,675 | 73641 | 10037       | 6     |
| 2 | Compound 1d  | 5,669 | 4710  | 462         | 6     |

## LOD LOQ\_1d\_Report

Reported by User: Roxana Roman (Roxana\_Roman)  
 Acquisition Server: Waters7  
 Project Name: Test  
 Sample Set Name: LOD\_LOQ\_Linearity\_Pyridine Met  
 Code column: Inertsil ODS-3, 4,6\*250 mm, 5 um

### SAMPLE INFORMATION

|                   |                      |                     |                                |
|-------------------|----------------------|---------------------|--------------------------------|
| Sample Name:      | Solution 0.08 ug/ mL | Date Acquired:      | 11.06.2022 13:27:42            |
| Sample Type:      | Standard             | Acq. Method Set:    | LOD_LOQ_Linearity_Pyridine_Met |
| Vial:             | 5                    | Date Processed:     | 11.02.2023 13:09:17            |
| Injection #:      | 1                    | Processing Method:  | Linearity_Pyridine_M_Methoxy   |
| Injection Volume: | 100,00 ul            | Channel Name:       | Extract 275,0                  |
| Run Time:         | 20,0 Minutes         | Proc. Chnl. Descr.: | PDA 275,0 nm, Smoothed by 25   |
| Acquired By:      | Roxana_Roman         |                     |                                |

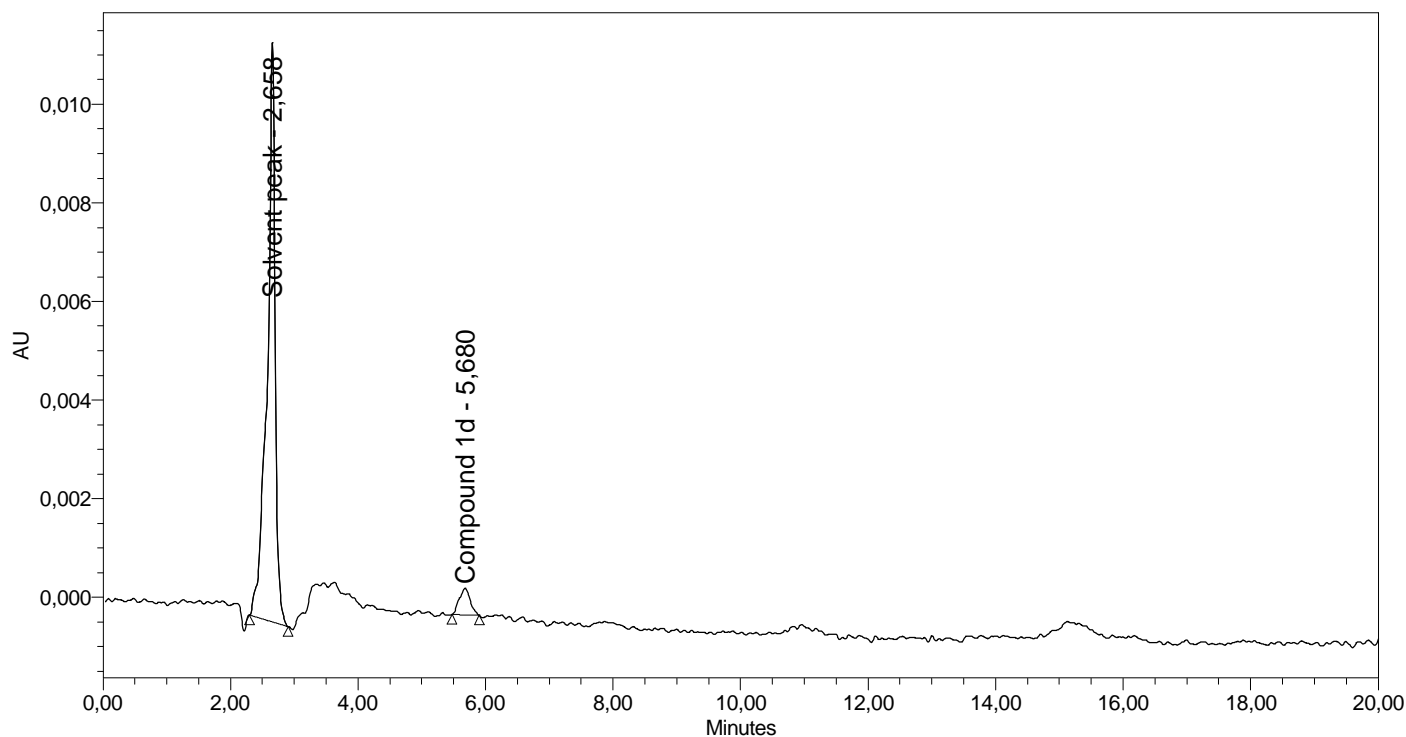

|   | Peak Name    | RT    | Area   | Height (µV) | Level |
|---|--------------|-------|--------|-------------|-------|
| 1 | Solvent peak | 2,658 | 101752 | 11732       | 8     |
| 2 | Compound 1d  | 5,680 | 6406   | 539         | 8     |

## LOD LOQ\_1d\_Report

Reported by User: Roxana Roman (Roxana\_Roman)  
 Acquisition Server: Waters7  
 Project Name: Test  
 Sample Set Name: LOD\_LOQ\_Linearity\_Pyridine Met  
 Code column: Inertsil ODS-3, 4,6\*250 mm, 5 um

### SAMPLE INFORMATION

|                   |                      |                     |                                |
|-------------------|----------------------|---------------------|--------------------------------|
| Sample Name:      | Solution 0.08 ug/ mL | Date Acquired:      | 11.06.2022 13:48:26            |
| Sample Type:      | Standard             | Acq. Method Set:    | LOD_LOQ_Linearity_Pyridine_Met |
| Vial:             | 5                    | Date Processed:     | 11.02.2023 13:09:07            |
| Injection #:      | 2                    | Processing Method:  | Linearity_Pyridine_M_Methoxy   |
| Injection Volume: | 100,00 ul            | Channel Name:       | Extract 275,0                  |
| Run Time:         | 20,0 Minutes         | Proc. Chnl. Descr.: | PDA 275,0 nm, Smoothed by 25   |
| Acquired By:      | Roxana_Roman         |                     |                                |

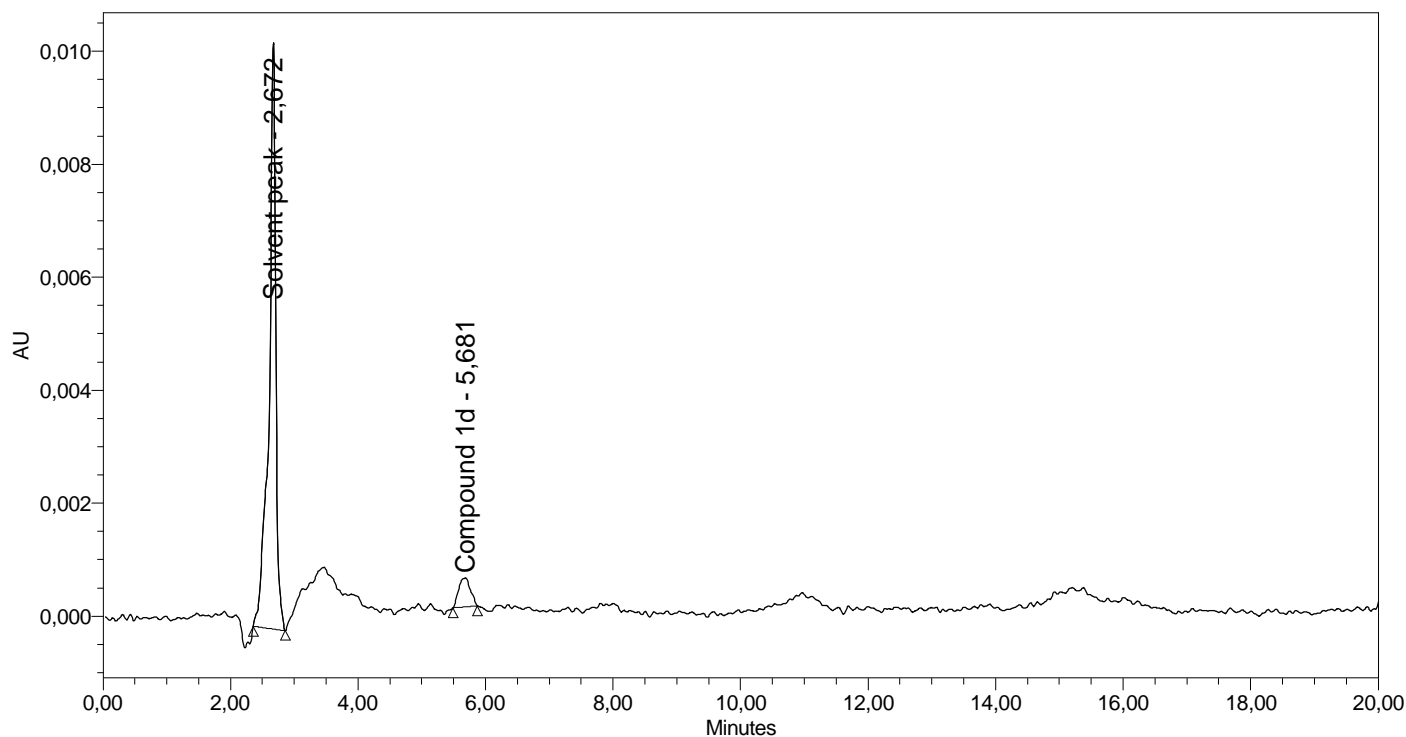

|   | Peak Name    | RT    | Area  | Height (μV) | Level |
|---|--------------|-------|-------|-------------|-------|
| 1 | Solvent peak | 2,672 | 77109 | 10391       | 8     |
| 2 | Compound 1d  | 5,681 | 6552  | 512         | 8     |



## LOD LOQ\_1d\_Report

Reported by User: Roxana Roman (Roxana\_Roman)  
 Acquisition Server: Waters7  
 Project Name: Test  
 Sample Set Name: LOD\_LOQ\_Linearity\_Pyridine Met  
 Code column: Inertsil ODS-3, 4,6\*250 mm, 5 um

### SAMPLE INFORMATION

|                   |                     |                     |                                |
|-------------------|---------------------|---------------------|--------------------------------|
| Sample Name:      | Solution 0.1 ug/ mL | Date Acquired:      | 11.06.2022 14:09:14            |
| Sample Type:      | Standard            | Acq. Method Set:    | LOD_LOQ_Linearity_Pyridine_Met |
| Vial:             | 6                   | Date Processed:     | 11.02.2023 13:12:53            |
| Injection #:      | 1                   | Processing Method:  | Linearity_Pyridine_M_Methoxy   |
| Injection Volume: | 100,00 ul           | Channel Name:       | Extract 275,0                  |
| Run Time:         | 20,0 Minutes        | Proc. Chnl. Descr.: | PDA 275,0 nm, Smoothed by 25   |
| Acquired By:      | Roxana_Roman        |                     |                                |

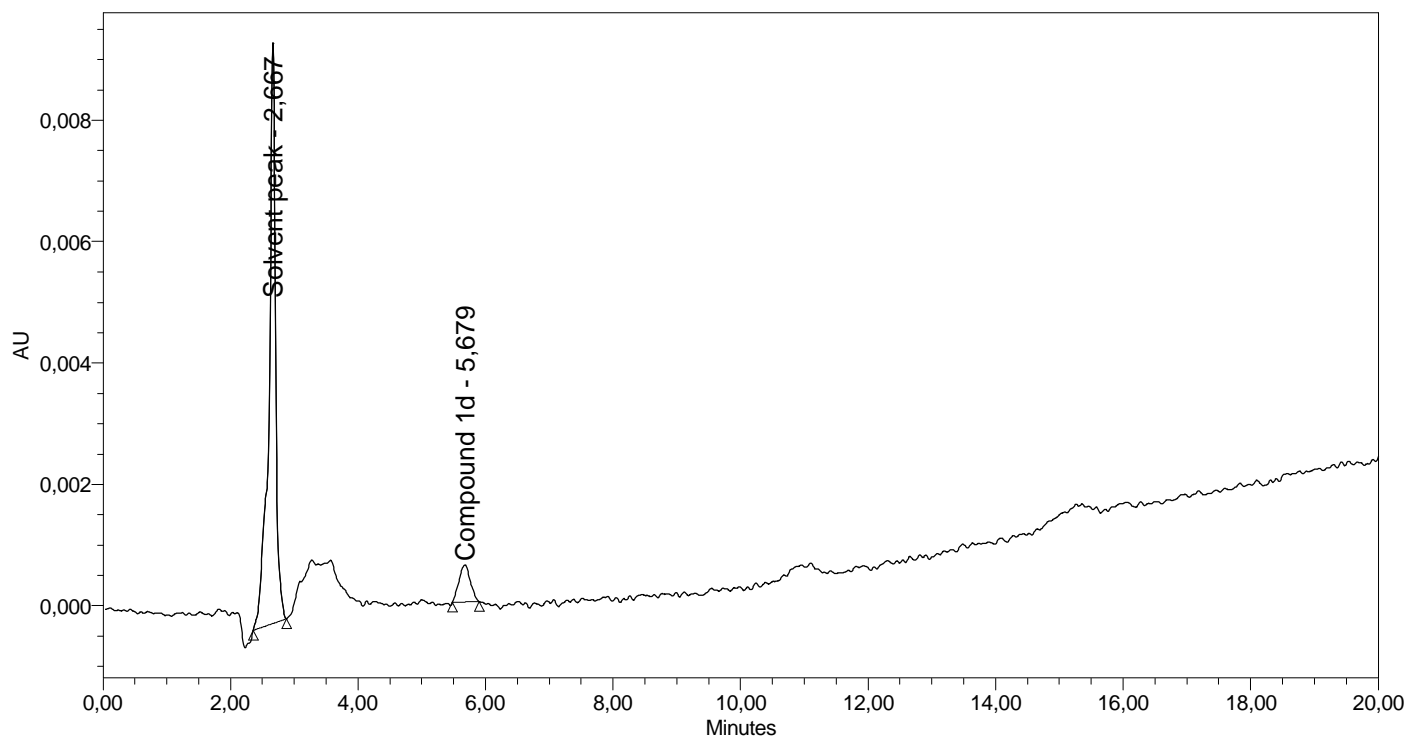

|   | Peak Name    | RT    | Area  | Height (µV) | Level |
|---|--------------|-------|-------|-------------|-------|
| 1 | Solvent peak | 2,667 | 69780 | 9557        | 10    |
| 2 | Compound 1d  | 5,679 | 7545  | 614         | 10    |

## LOD LOQ\_1d\_Report

Reported by User: Roxana Roman (Roxana\_Roman)  
 Acquisition Server: Waters7  
 Project Name: Test  
 Sample Set Name: LOD\_LOQ\_Linearity\_Pyridine Met  
 Code column: Inertsil ODS-3, 4,6\*250 mm, 5 um

### SAMPLE INFORMATION

|                   |                     |                     |                                |
|-------------------|---------------------|---------------------|--------------------------------|
| Sample Name:      | Solution 0.1 ug/ mL | Date Acquired:      | 11.06.2022 14:29:58            |
| Sample Type:      | Standard            | Acq. Method Set:    | LOD_LOQ_Linearity_Pyridine_Met |
| Vial:             | 6                   | Date Processed:     | 11.02.2023 13:08:42            |
| Injection #:      | 2                   | Processing Method:  | Linearity_Pyridine_M_Methoxy   |
| Injection Volume: | 100,00 ul           | Channel Name:       | Extract 275,0                  |
| Run Time:         | 20,0 Minutes        | Proc. Chnl. Descr.: | PDA 275,0 nm, Smoothed by 25   |
| Acquired By:      | Roxana_Roman        |                     |                                |

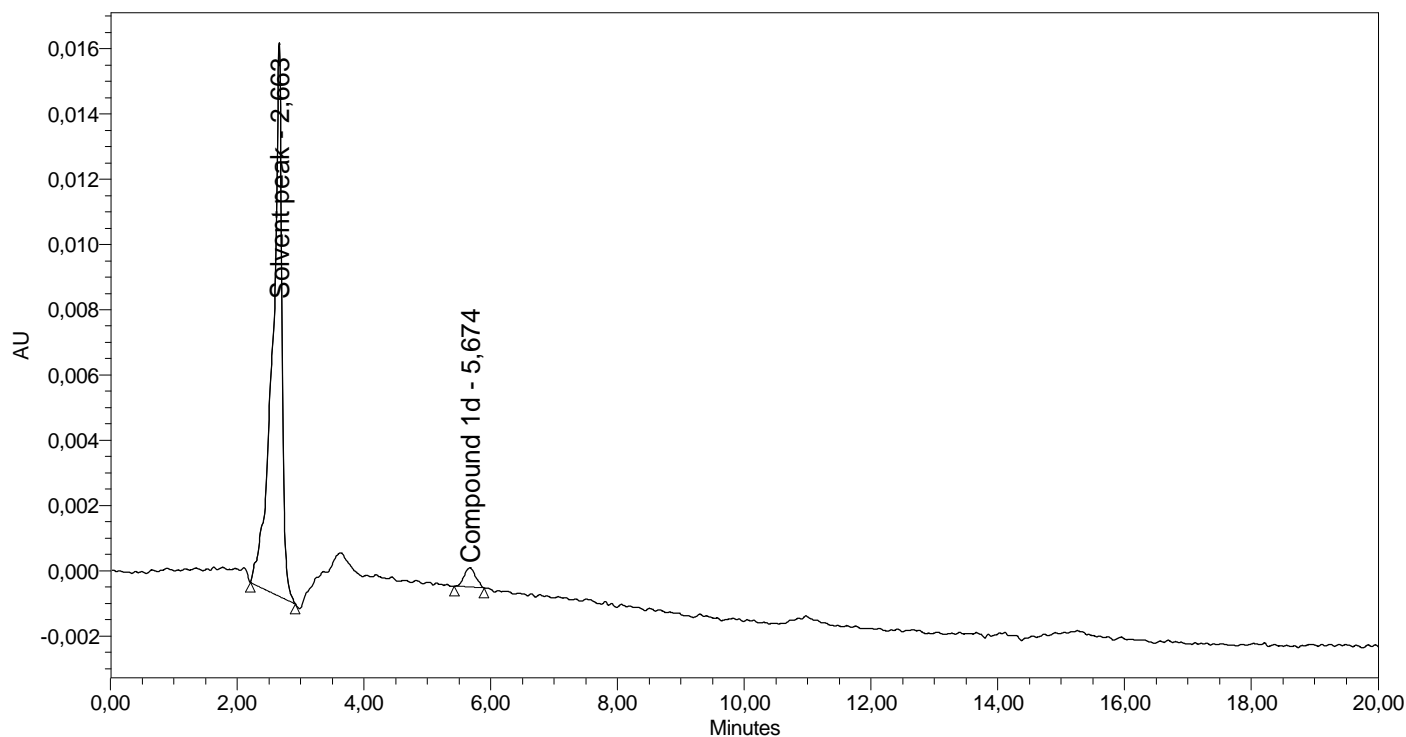

|   | Peak Name    | RT    | Area   | Height (µV) | Level |
|---|--------------|-------|--------|-------------|-------|
| 1 | Solvent peak | 2,663 | 176979 | 17000       | 10    |
| 2 | Compound 1d  | 5,674 | 7346   | 585         | 10    |

## LOD LOQ\_1d\_Report

Reported by User: Roxana Roman (Roxana\_Roman)  
 Acquisition Server: Waters7  
 Project Name: Test  
 Sample Set Name: LOD\_LOQ\_Linearity\_Pyridine Met  
 Code column: Inertsil ODS-3, 4,6\*250 mm, 5 um

### SAMPLE INFORMATION

|                   |                     |                     |                                |
|-------------------|---------------------|---------------------|--------------------------------|
| Sample Name:      | Solution 0.2 ug/ mL | Date Acquired:      | 11.06.2022 14:50:45            |
| Sample Type:      | Standard            | Acq. Method Set:    | LOD_LOQ_Linearity_Pyridine_Met |
| Vial:             | 7                   | Date Processed:     | 11.02.2023 13:08:06            |
| Injection #:      | 1                   | Processing Method:  | Linearity_Pyridine_M_Methoxy   |
| Injection Volume: | 100,00 ul           | Channel Name:       | Extract 275,0                  |
| Run Time:         | 20,0 Minutes        | Proc. Chnl. Descr.: | PDA 275,0 nm, Smoothed by 25   |
| Acquired By:      | Roxana_Roman        |                     |                                |

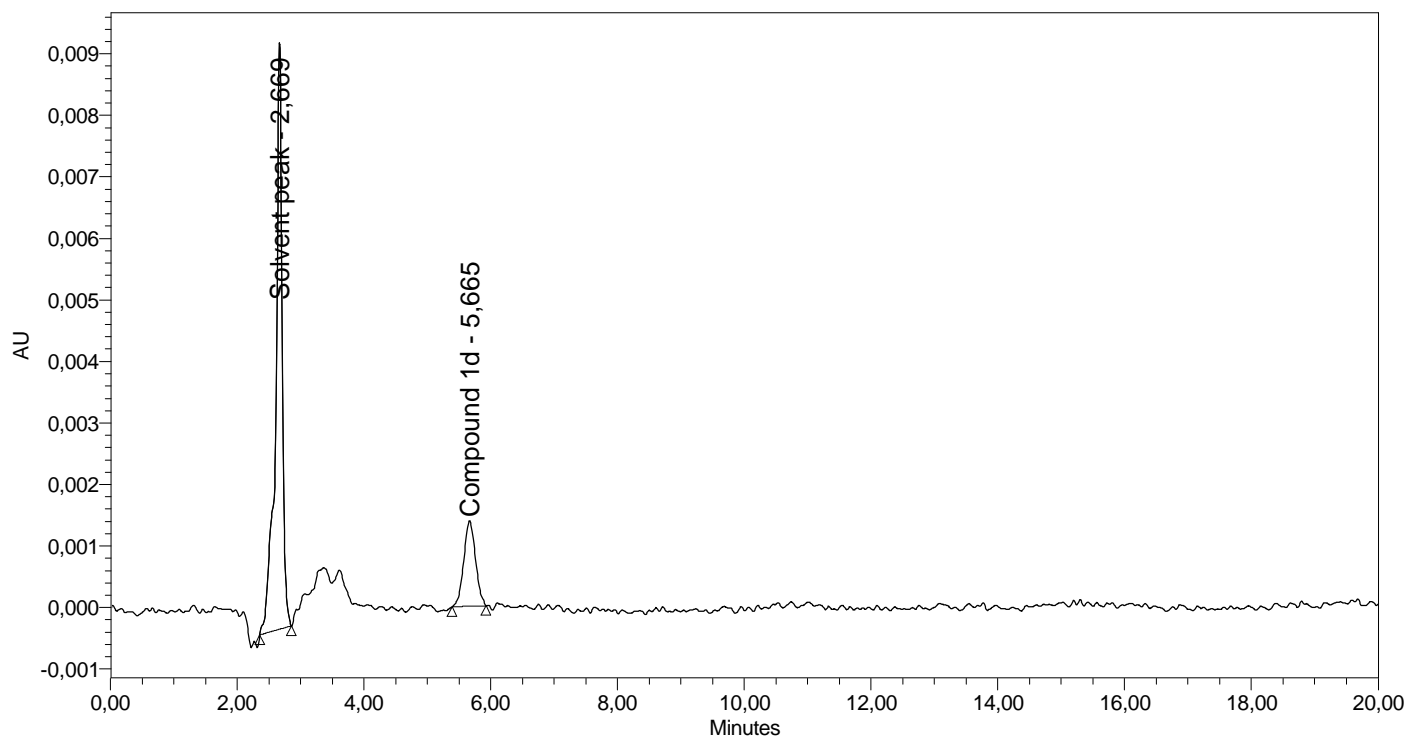

|   | Peak Name    | RT    | Area  | Height (μV) | Level |
|---|--------------|-------|-------|-------------|-------|
| 1 | Solvent peak | 2,669 | 67923 | 9546        | 20    |
| 2 | Compound 1d  | 5,665 | 17849 | 1384        | 20    |

## LOD LOQ\_1d\_Report

Reported by User: Roxana Roman (Roxana\_Roman)  
 Acquisition Server: Waters7  
 Project Name: Test  
 Sample Set Name: LOD\_LOQ\_Linearity\_Pyridine Met  
 Code column: Inertsil ODS-3, 4,6\*250 mm, 5 um

### SAMPLE INFORMATION

|                   |                     |                     |                                |
|-------------------|---------------------|---------------------|--------------------------------|
| Sample Name:      | Solution 0.2 ug/ mL | Date Acquired:      | 11.06.2022 15:11:29            |
| Sample Type:      | Standard            | Acq. Method Set:    | LOD_LOQ_Linearity_Pyridine_Met |
| Vial:             | 7                   | Date Processed:     | 11.02.2023 13:07:55            |
| Injection #:      | 2                   | Processing Method:  | Linearity_Pyridine_M_Methoxy   |
| Injection Volume: | 100,00 ul           | Channel Name:       | Extract 275,0                  |
| Run Time:         | 20,0 Minutes        | Proc. Chnl. Descr.: | PDA 275,0 nm, Smoothed by 25   |
| Acquired By:      | Roxana_Roman        |                     |                                |

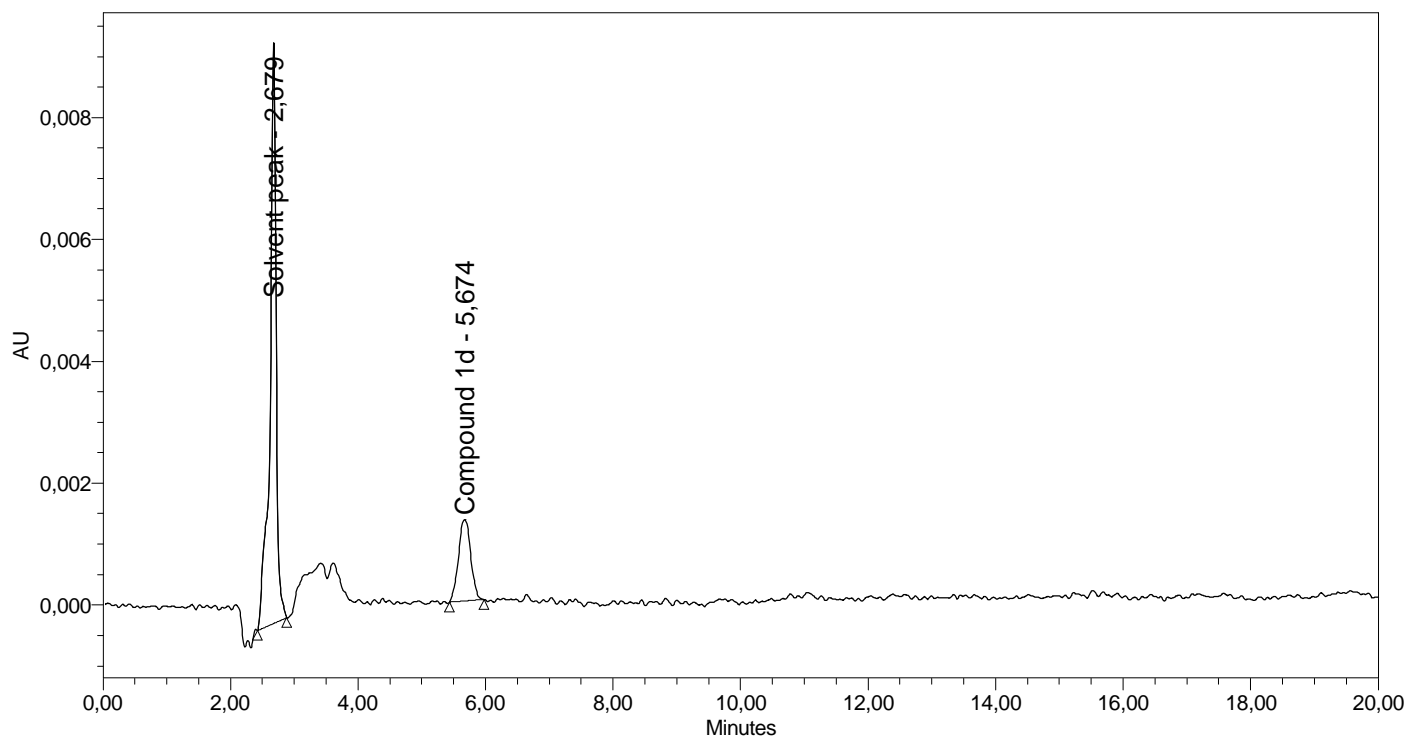

|   | Peak Name    | RT    | Area  | Height (µV) | Level |
|---|--------------|-------|-------|-------------|-------|
| 1 | Solvent peak | 2,679 | 64525 | 9571        | 20    |
| 2 | Compound 1d  | 5,674 | 17837 | 1333        | 20    |

## **Quantitative determination of**

*compound 1d*

### **- Validation of the analytical method -**

Validation parameters:

- Specificity
- Precision 1
- Precision 2
- LOD – LOQ
- **Linearity**
- **Range**
- Accuracy

## Linearity Calibration Curve

Reported by User: Roxana Roman (Roxana\_Roman)  
 Acquisition Server: Waters7  
 Project Name: Test  
 Sample Set Name: LOD\_LOQ\_Linearity\_Pyridine Met  
 Code column: Inertsil ODS-3, 250\*4.6 mm, 5 um

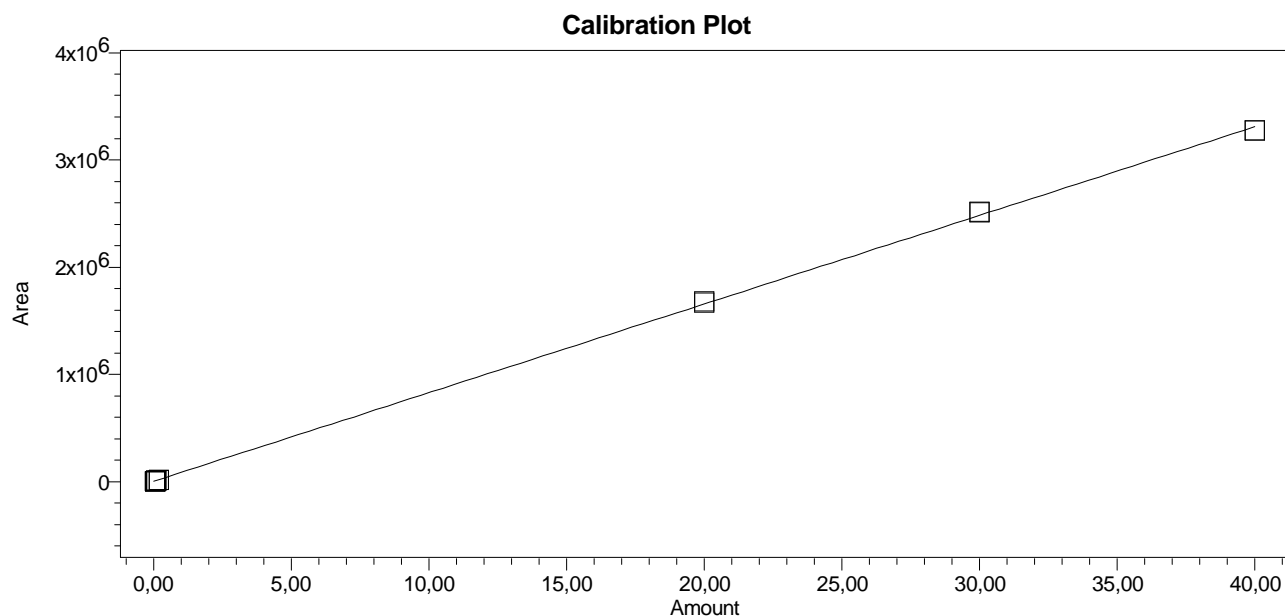

Name: Compound 1d; Processing Method: Linearity\_Pyridine\_M\_Methoxy; Fit Type: Linear (1st Order); Cal Curve Id: 4844; A: 3,663288e+003; B: 8,265387e+004; C: 0,000000e+000; D: 0,000000e+000; R<sup>2</sup>: 0,999788; Standard Error 1,972172e+004

**Calibration Plot group for Solvent peak contains no data.**

Peak: Compound 1d

|    | Name        | Level | X Value   | Response       | Calc. Value | % Deviation | Manual | Ignore |
|----|-------------|-------|-----------|----------------|-------------|-------------|--------|--------|
| 1  | Compound 1d | 5     | 0,050000  | 4071,743656    | 0,004942    | -90,116     | No     | No     |
| 2  | Compound 1d | 5     | 0,050000  | 3997,911266    | 0,004048    | -91,903     | No     | No     |
| 3  | Compound 1d | 6     | 0,060000  | 4604,067650    | 0,011382    | -81,030     | No     | No     |
| 4  | Compound 1d | 6     | 0,060000  | 4710,043738    | 0,012664    | -78,893     | No     | No     |
| 5  | Compound 1d | 8     | 0,080000  | 6405,660466    | 0,033179    | -58,526     | No     | No     |
| 6  | Compound 1d | 8     | 0,080000  | 6552,166667    | 0,034952    | -56,311     | No     | No     |
| 7  | Compound 1d | 10    | 0,100000  | 7544,638514    | 0,046959    | -53,041     | No     | No     |
| 8  | Compound 1d | 10    | 0,100000  | 7346,426958    | 0,044561    | -55,439     | No     | No     |
| 9  | Compound 1d | 20    | 0,200000  | 17849,038191   | 0,171628    | -14,186     | No     | No     |
| 10 | Compound 1d | 20    | 0,200000  | 17837,293510   | 0,171486    | -14,257     | No     | No     |
| 11 | Compound 1d | 2000  | 20,000000 | 1671583,544206 | 20,179577   | 0,898       | No     | No     |
| 12 | Compound 1d | 2000  | 20,000000 | 1683469,718450 | 20,323384   | 1,617       | No     | No     |
| 13 | Compound 1d | 3000  | 30,000000 | 2510959,078862 | 30,334885   | 1,116       | No     | No     |
| 14 | Compound 1d | 3000  | 30,000000 | 2518985,651199 | 30,431996   | 1,440       | No     | No     |
| 15 | Compound 1d | 4000  | 40,000000 | 3274980,767505 | 39,578513   | -1,054      | No     | No     |
| 16 | Compound 1d | 4000  | 40,000000 | 3276413,074307 | 39,595842   | -1,010      | No     | No     |

---

## Linearity Calibration Curve

---

Reported by User: Roxana Roman (Roxana\_Roman)  
Acquisition Server: Waters7  
Project Name: Test  
Sample Set Name: LOD\_LOQ\_Linearity\_Pyridine Met  
Code column: Inertsil ODS-3, 250\*4.6 mm, 5 um  
Point Information ' Peak: Solvent peak' table contains no data.

## Seria Metoxi\_1d\_Linearity

Reported by User: Roxana Roman (Roxana\_Roman)  
 Acquisition Server: Waters7  
 Project Name: Test  
 Sample Set Name: LOD\_LOQ\_Linearity\_Pyridine Met  
 Code column: Inertsil ODS-3, 4,6\*250 mm, 5 um

### SAMPLE INFORMATION

|                   |                      |                     |                                |
|-------------------|----------------------|---------------------|--------------------------------|
| Sample Name:      | Solution 0.05 ug/ mL | Date Acquired:      | 11.06.2022 12:45:55            |
| Sample Type:      | Standard             | Acq. Method Set:    | LOD_LOQ_Linearity_Pyridine_Met |
| Vial:             | 3                    | Date Processed:     | 20.02.2023 10:58:16            |
| Injection #:      | 1                    | Processing Method:  | Linearity_Pyridine_M_Methoxy   |
| Injection Volume: | 100,00 ul            | Channel Name:       | Extract 275,0                  |
| Run Time:         | 20,0 Minutes         | Proc. Chnl. Descr.: | PDA 275,0 nm, Smoothed by 25   |
| Acquired By:      | Roxana_Roman         |                     |                                |

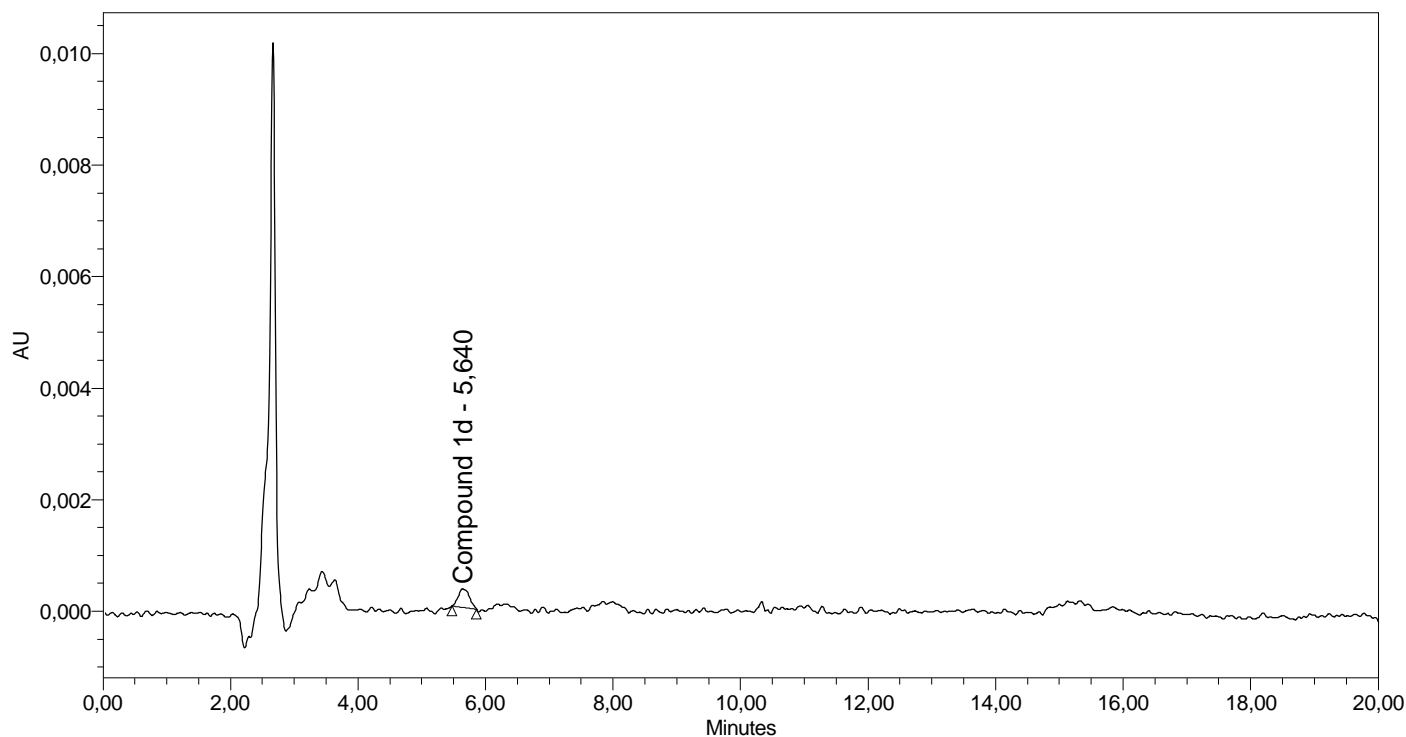

|   | Peak Name   | RT    | Area | Height (μV) | Level |
|---|-------------|-------|------|-------------|-------|
| 1 | Compound 1d | 5,640 | 4072 | 328         | 5     |



## Seria Metoxi\_1d\_Linearity

Reported by User: Roxana Roman (Roxana\_Roman)  
 Acquisition Server: Waters7  
 Project Name: Test  
 Sample Set Name: LOD\_LOQ\_Linearity\_Pyridine Met  
 Code column: Inertsil ODS-3, 4,6\*250 mm, 5 um

### SAMPLE INFORMATION

|                   |                      |                     |                                |
|-------------------|----------------------|---------------------|--------------------------------|
| Sample Name:      | Solution 0.05 ug/ mL | Date Acquired:      | 11.06.2022 13:06:54            |
| Sample Type:      | Standard             | Acq. Method Set:    | LOD_LOQ_Linearity_Pyridine_Met |
| Vial:             | 3                    | Date Processed:     | 20.02.2023 10:58:43            |
| Injection #:      | 2                    | Processing Method:  | Linearity_Pyridine_M_Methoxy   |
| Injection Volume: | 100,00 ul            | Channel Name:       | Extract 275,0                  |
| Run Time:         | 20,0 Minutes         | Proc. Chnl. Descr.: | PDA 275,0 nm, Smoothed by 25   |
| Acquired By:      | Roxana_Roman         |                     |                                |

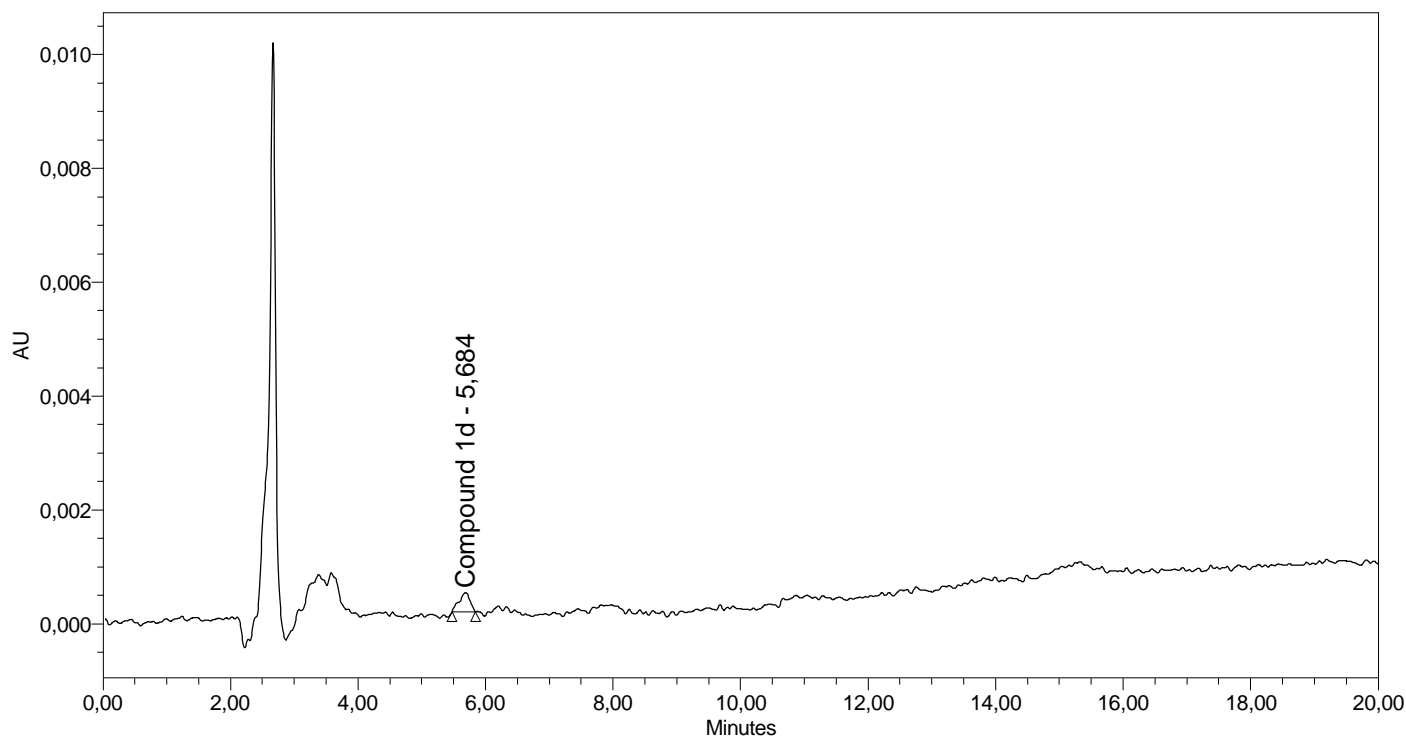

|   | Peak Name   | RT    | Area | Height (µV) | Level |
|---|-------------|-------|------|-------------|-------|
| 1 | Compound 1d | 5,684 | 3998 | 337         | 5     |

## Seria Metoxi\_1d\_Linearity

Reported by User: Roxana Roman (Roxana\_Roman)  
 Acquisition Server: Waters7  
 Project Name: Test  
 Sample Set Name: LOD\_LOQ\_Linearity\_Pyridine Met  
 Code column: Inertsil ODS-3, 4,6\*250 mm, 5 um

### SAMPLE INFORMATION

|                   |                      |                     |                                |
|-------------------|----------------------|---------------------|--------------------------------|
| Sample Name:      | Solution 0.06 ug/ mL | Date Acquired:      | 11.06.2022 12:03:47            |
| Sample Type:      | Standard             | Acq. Method Set:    | LOD_LOQ_Linearity_Pyridine_Met |
| Vial:             | 4                    | Date Processed:     | 20.02.2023 10:59:18            |
| Injection #:      | 1                    | Processing Method:  | Linearity_Pyridine_M_Methoxy   |
| Injection Volume: | 100,00 ul            | Channel Name:       | Extract 275,0                  |
| Run Time:         | 20,0 Minutes         | Proc. Chnl. Descr.: | PDA 275,0 nm, Smoothed by 25   |
| Acquired By:      | Roxana_Roman         |                     |                                |

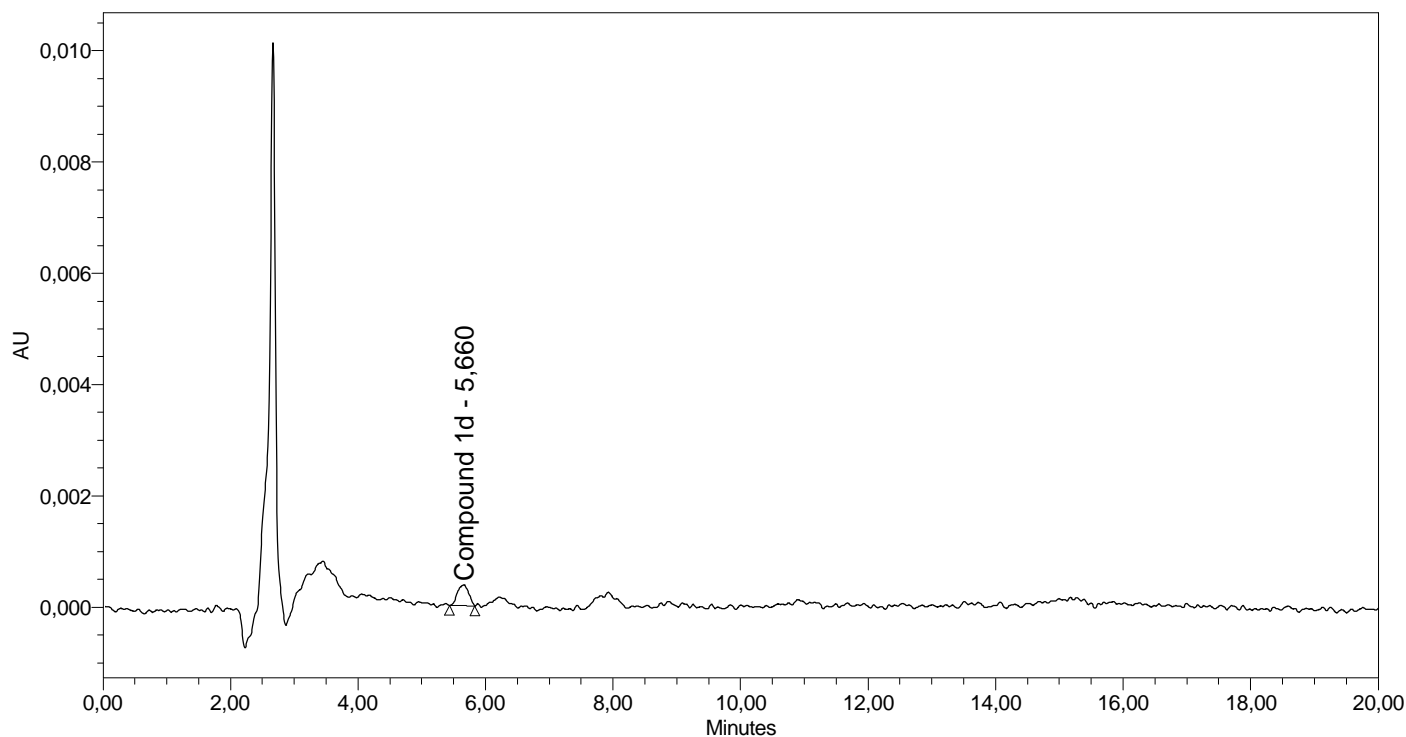

|   | Peak Name   | RT    | Area | Height (µV) | Level |
|---|-------------|-------|------|-------------|-------|
| 1 | Compound 1d | 5,660 | 4604 | 378         | 6     |

## Seria Metoxi\_1d\_Linearity

Reported by User: Roxana Roman (Roxana\_Roman)  
 Acquisition Server: Waters7  
 Project Name: Test  
 Sample Set Name: LOD\_LOQ\_Linearity\_Pyridine Met  
 Code column: Inertsil ODS-3, 4,6\*250 mm, 5 um

### SAMPLE INFORMATION

|                   |                      |                     |                                |
|-------------------|----------------------|---------------------|--------------------------------|
| Sample Name:      | Solution 0.06 ug/ mL | Date Acquired:      | 11.06.2022 12:24:32            |
| Sample Type:      | Standard             | Acq. Method Set:    | LOD_LOQ_Linearity_Pyridine_Met |
| Vial:             | 4                    | Date Processed:     | 20.02.2023 10:59:39            |
| Injection #:      | 2                    | Processing Method:  | Linearity_Pyridine_M_Methoxy   |
| Injection Volume: | 100,00 ul            | Channel Name:       | Extract 275,0                  |
| Run Time:         | 20,0 Minutes         | Proc. Chnl. Descr.: | PDA 275,0 nm, Smoothed by 25   |
| Acquired By:      | Roxana_Roman         |                     |                                |

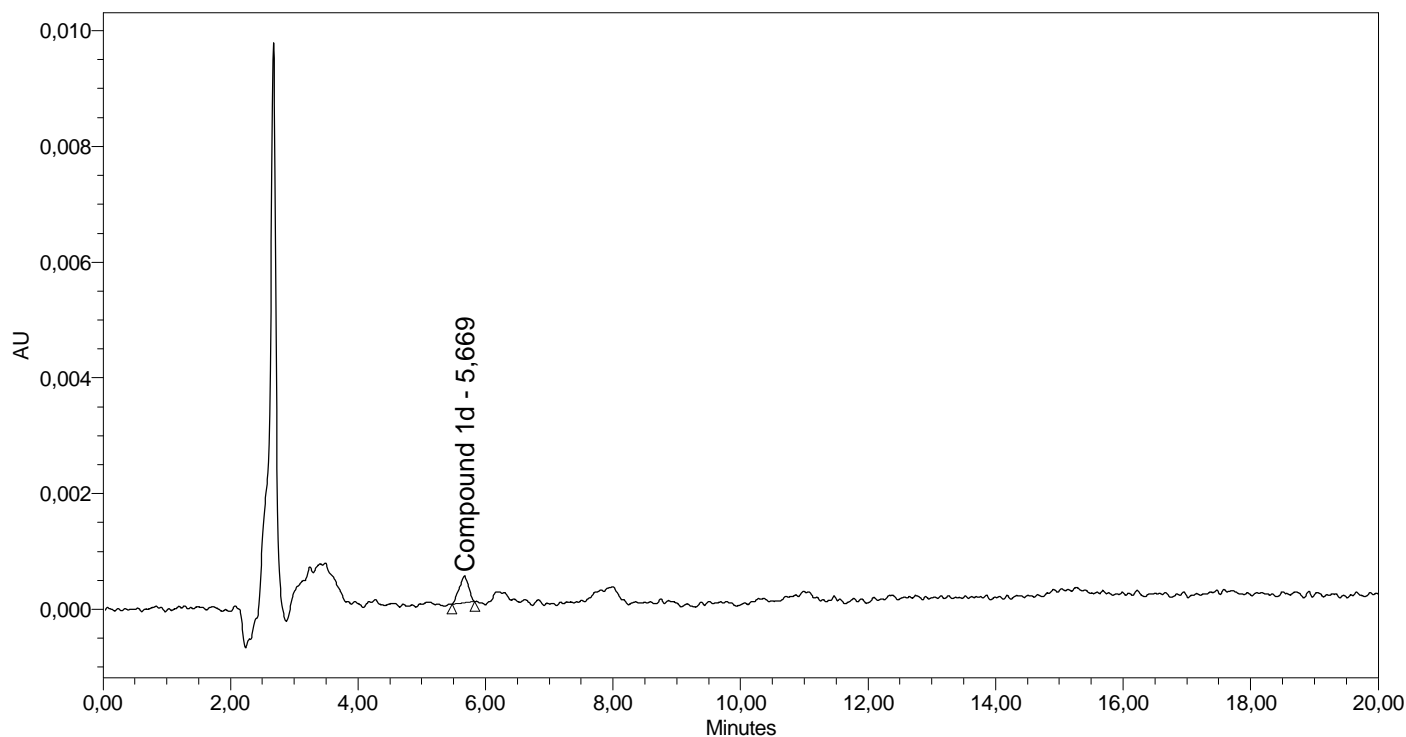

|   | Peak Name   | RT    | Area | Height (μV) | Level |
|---|-------------|-------|------|-------------|-------|
| 1 | Compound 1d | 5,669 | 4710 | 462         | 6     |

## Seria Metoxi\_1d\_Linearity

Reported by User: Roxana Roman (Roxana\_Roman)  
 Acquisition Server: Waters7  
 Project Name: Test  
 Sample Set Name: LOD\_LOQ\_Linearity\_Pyridine Met  
 Code column: Inertsil ODS-3, 4,6\*250 mm, 5 um

### SAMPLE INFORMATION

|                   |                      |                     |                                |
|-------------------|----------------------|---------------------|--------------------------------|
| Sample Name:      | Solution 0.08 ug/ mL | Date Acquired:      | 11.06.2022 13:27:42            |
| Sample Type:      | Standard             | Acq. Method Set:    | LOD_LOQ_Linearity_Pyridine_Met |
| Vial:             | 5                    | Date Processed:     | 20.02.2023 11:00:40            |
| Injection #:      | 1                    | Processing Method:  | Linearity_Pyridine_M_Methoxy   |
| Injection Volume: | 100,00 ul            | Channel Name:       | Extract 275,0                  |
| Run Time:         | 20,0 Minutes         | Proc. Chnl. Descr.: | PDA 275,0 nm, Smoothed by 25   |
| Acquired By:      | Roxana_Roman         |                     |                                |

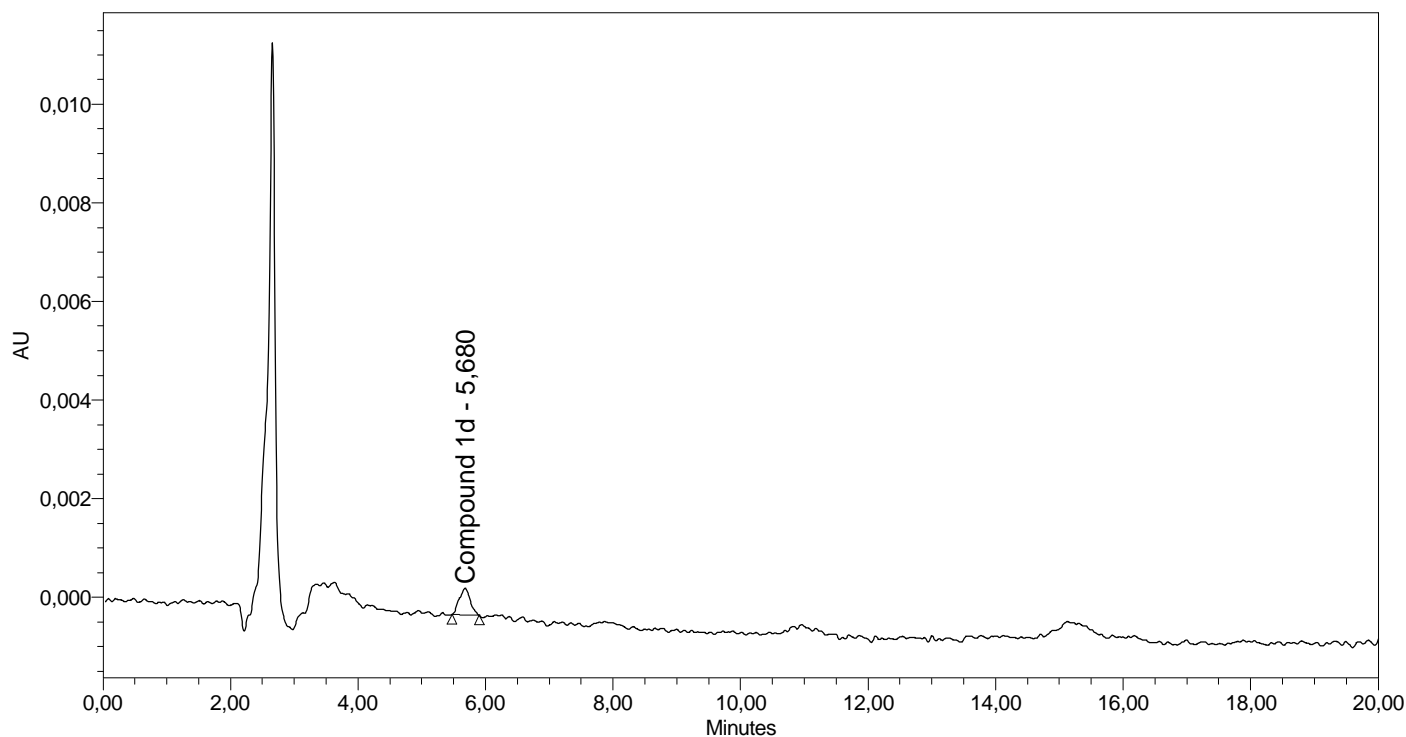

|   | Peak Name   | RT    | Area | Height (µV) | Level |
|---|-------------|-------|------|-------------|-------|
| 1 | Compound 1d | 5,680 | 6406 | 539         | 8     |

## Seria Metoxi\_1d\_Linearity

Reported by User: Roxana Roman (Roxana\_Roman)  
 Acquisition Server: Waters7  
 Project Name: Test  
 Sample Set Name: LOD\_LOQ\_Linearity\_Pyridine Met  
 Code column: Inertsil ODS-3, 4,6\*250 mm, 5 um

### SAMPLE INFORMATION

|                   |                      |                     |                                |
|-------------------|----------------------|---------------------|--------------------------------|
| Sample Name:      | Solution 0.08 ug/ mL | Date Acquired:      | 11.06.2022 13:48:26            |
| Sample Type:      | Standard             | Acq. Method Set:    | LOD_LOQ_Linearity_Pyridine_Met |
| Vial:             | 5                    | Date Processed:     | 20.02.2023 11:02:22            |
| Injection #:      | 2                    | Processing Method:  | Linearity_Pyridine_M_Methoxy   |
| Injection Volume: | 100,00 ul            | Channel Name:       | Extract 275,0                  |
| Run Time:         | 20,0 Minutes         | Proc. Chnl. Descr.: | PDA 275,0 nm, Smoothed by 25   |
| Acquired By:      | Roxana_Roman         |                     |                                |

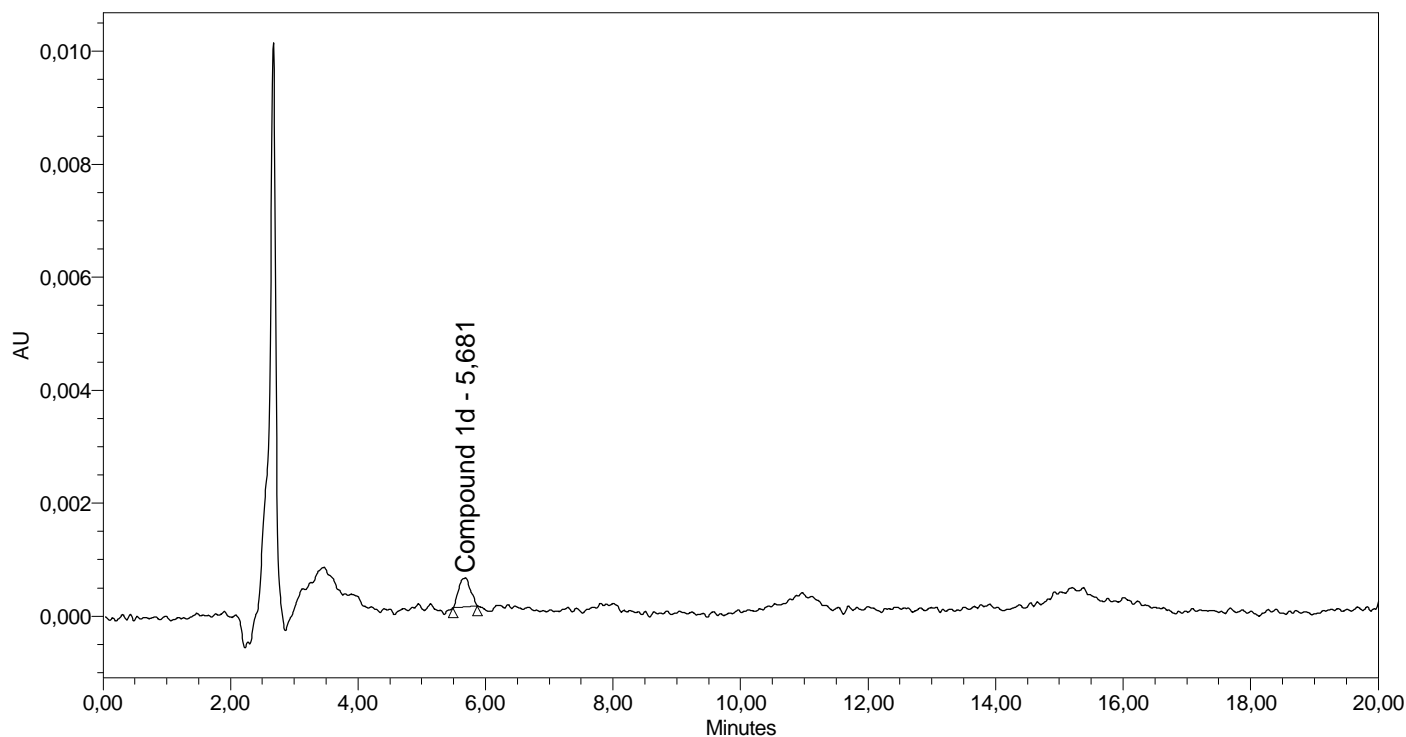

|   | Peak Name   | RT    | Area | Height (µV) | Level |
|---|-------------|-------|------|-------------|-------|
| 1 | Compound 1d | 5,681 | 6552 | 512         | 8     |

## Seria Metoxi\_1d\_Linearity

Reported by User: Roxana Roman (Roxana\_Roman)  
 Acquisition Server: Waters7  
 Project Name: Test  
 Sample Set Name: LOD\_LOQ\_Linearity\_Pyridine Met  
 Code column: Inertsil ODS-3, 4,6\*250 mm, 5 um

### SAMPLE INFORMATION

|                   |                     |                     |                                |
|-------------------|---------------------|---------------------|--------------------------------|
| Sample Name:      | Solution 0.1 ug/ mL | Date Acquired:      | 11.06.2022 14:09:14            |
| Sample Type:      | Standard            | Acq. Method Set:    | LOD_LOQ_Linearity_Pyridine_Met |
| Vial:             | 6                   | Date Processed:     | 20.02.2023 10:54:39            |
| Injection #:      | 1                   | Processing Method:  | Linearity_Pyridine_M_Methoxy   |
| Injection Volume: | 100,00 ul           | Channel Name:       | Extract 275,0                  |
| Run Time:         | 20,0 Minutes        | Proc. Chnl. Descr.: | PDA 275,0 nm, Smoothed by 25   |
| Acquired By:      | Roxana_Roman        |                     |                                |

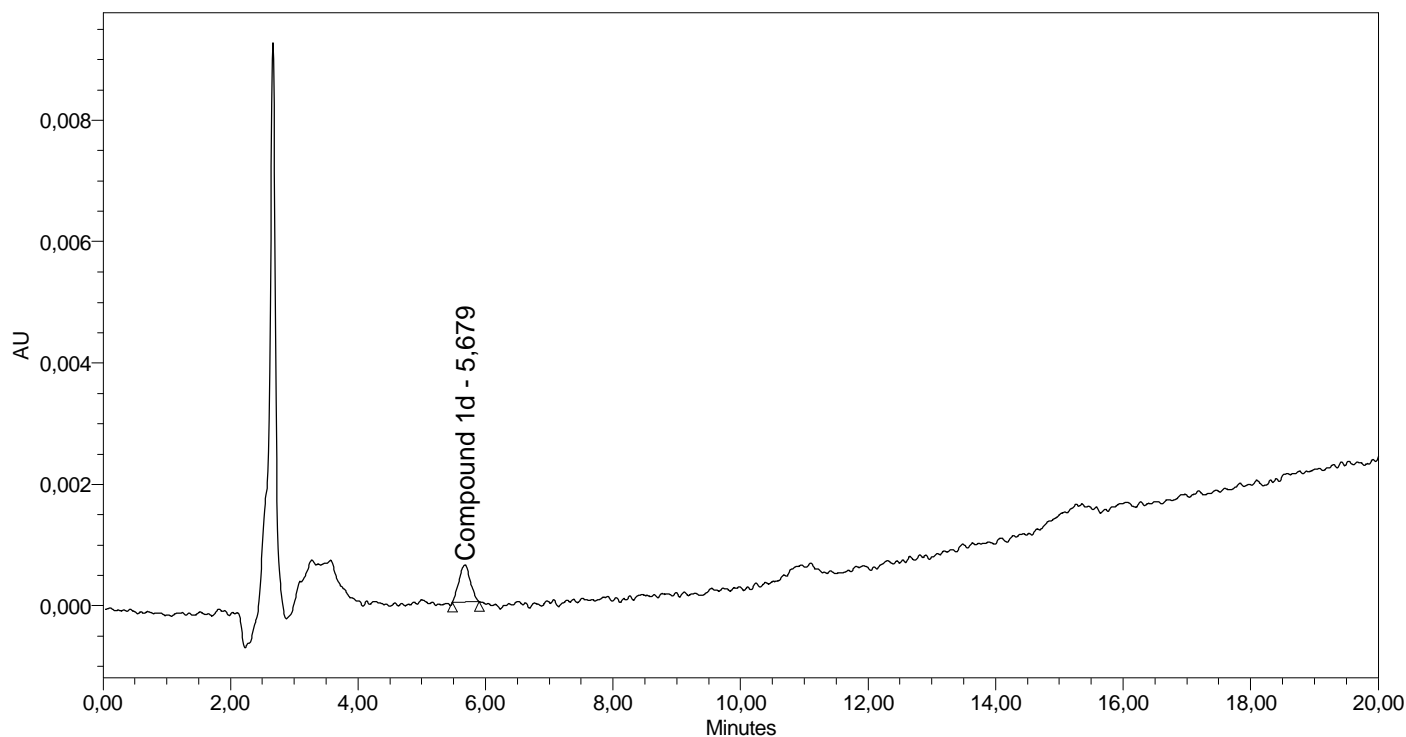

|   | Peak Name   | RT    | Area | Height (µV) | Level |
|---|-------------|-------|------|-------------|-------|
| 1 | Compound 1d | 5,679 | 7545 | 614         | 10    |

## Seria Metoxi\_1d\_Linearity

Reported by User: Roxana Roman (Roxana\_Roman)  
 Acquisition Server: Waters7  
 Project Name: Test  
 Sample Set Name: LOD\_LOQ\_Linearity\_Pyridine Met  
 Code column: Inertsil ODS-3, 4,6\*250 mm, 5 um

### SAMPLE INFORMATION

|                   |                     |                     |                                |
|-------------------|---------------------|---------------------|--------------------------------|
| Sample Name:      | Solution 0.1 ug/ mL | Date Acquired:      | 11.06.2022 14:29:58            |
| Sample Type:      | Standard            | Acq. Method Set:    | LOD_LOQ_Linearity_Pyridine_Met |
| Vial:             | 6                   | Date Processed:     | 20.02.2023 10:55:32            |
| Injection #:      | 2                   | Processing Method:  | Linearity_Pyridine_M_Methoxy   |
| Injection Volume: | 100,00 ul           | Channel Name:       | Extract 275,0                  |
| Run Time:         | 20,0 Minutes        | Proc. Chnl. Descr.: | PDA 275,0 nm, Smoothed by 25   |
| Acquired By:      | Roxana_Roman        |                     |                                |

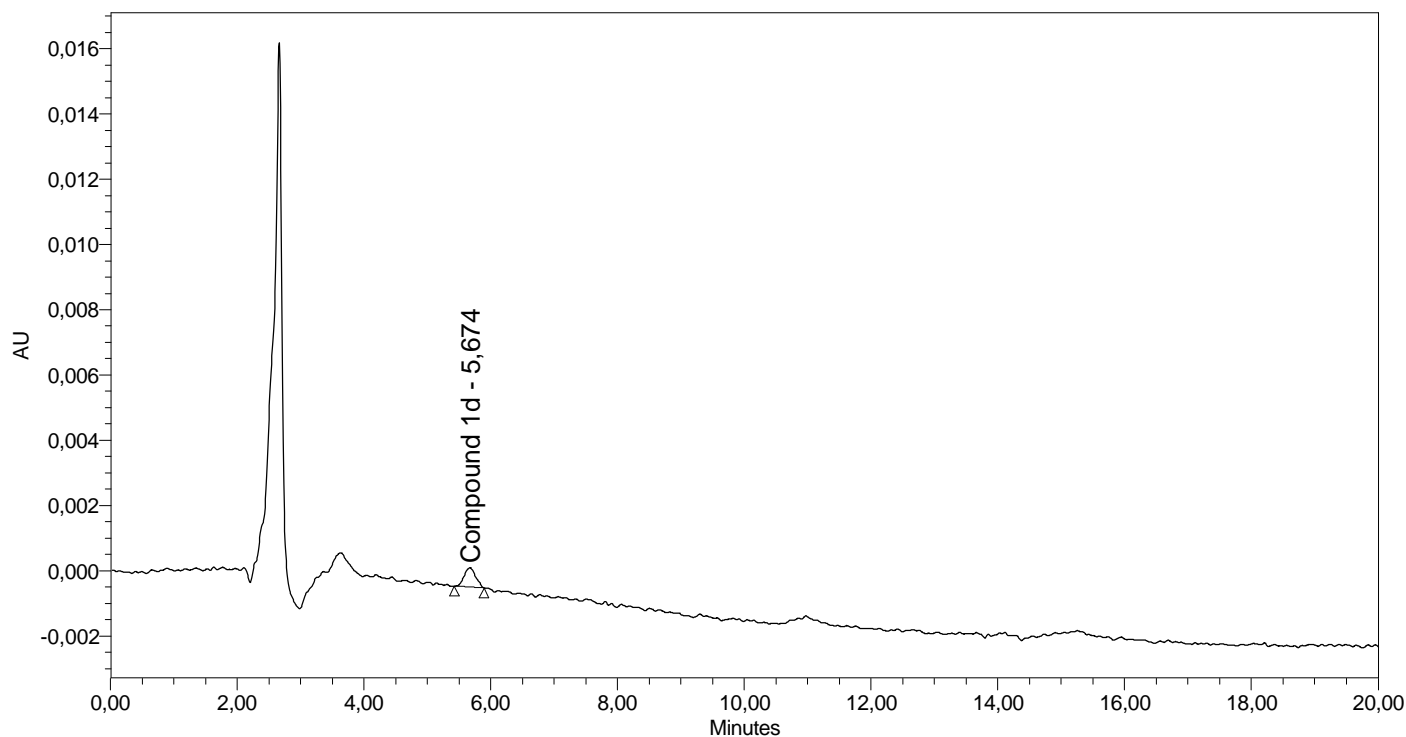

|   | Peak Name   | RT    | Area | Height (µV) | Level |
|---|-------------|-------|------|-------------|-------|
| 1 | Compound 1d | 5,674 | 7346 | 585         | 10    |

## Seria Metoxi\_1d\_Linearity

Reported by User: Roxana Roman (Roxana\_Roman)  
 Acquisition Server: Waters7  
 Project Name: Test  
 Sample Set Name: LOD\_LOQ\_Linearity\_Pyridine Met  
 Code column: Inertsil ODS-3, 4,6\*250 mm, 5 um

### SAMPLE INFORMATION

|                   |                     |                     |                                |
|-------------------|---------------------|---------------------|--------------------------------|
| Sample Name:      | Solution 0.2 ug/ mL | Date Acquired:      | 11.06.2022 14:50:45            |
| Sample Type:      | Standard            | Acq. Method Set:    | LOD_LOQ_Linearity_Pyridine_Met |
| Vial:             | 7                   | Date Processed:     | 20.02.2023 10:56:45            |
| Injection #:      | 1                   | Processing Method:  | Linearity_Pyridine_M_Methoxy   |
| Injection Volume: | 100,00 ul           | Channel Name:       | Extract 275,0                  |
| Run Time:         | 20,0 Minutes        | Proc. Chnl. Descr.: | PDA 275,0 nm, Smoothed by 25   |
| Acquired By:      | Roxana_Roman        |                     |                                |

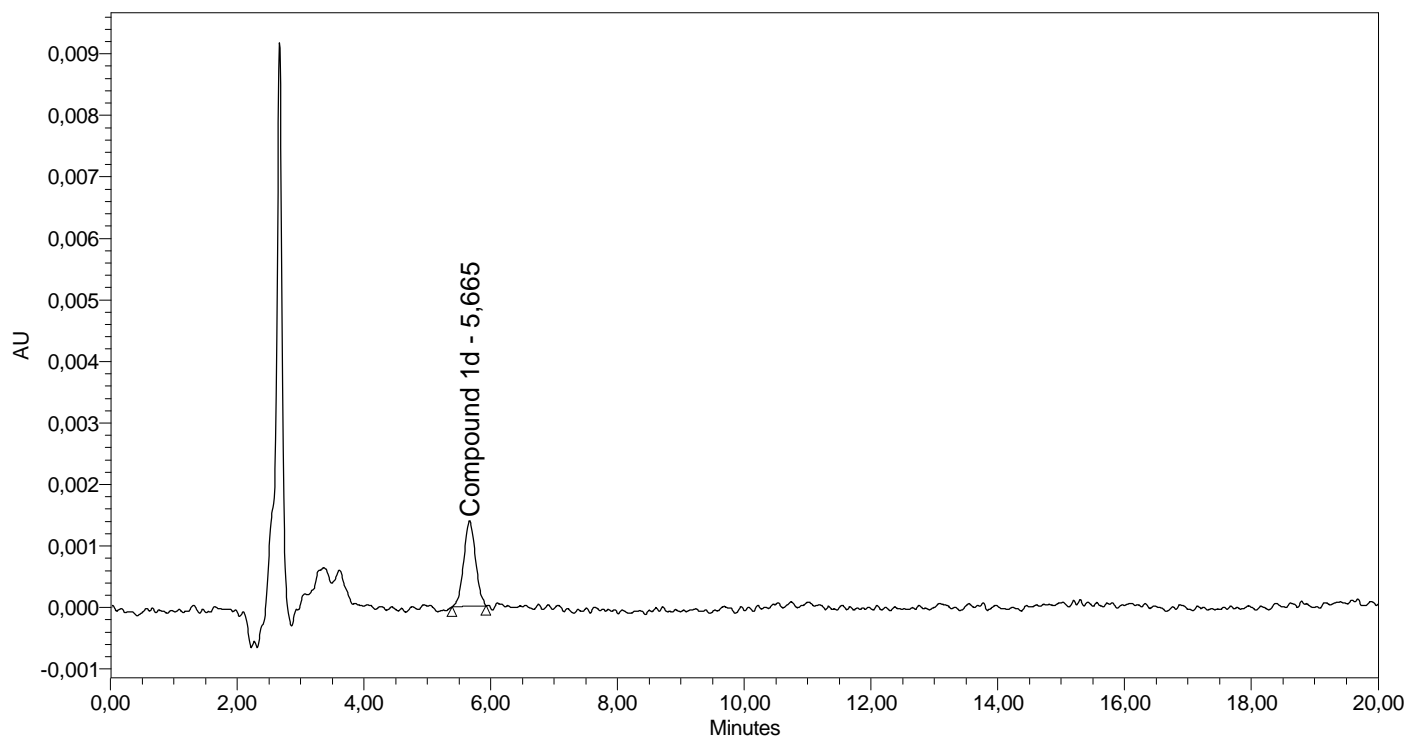

|   | Peak Name   | RT    | Area  | Height (μV) | Level |
|---|-------------|-------|-------|-------------|-------|
| 1 | Compound 1d | 5,665 | 17849 | 1384        | 20    |



## Seria Metoxi\_1d\_Linearity

Reported by User: Roxana Roman (Roxana\_Roman)  
 Acquisition Server: Waters7  
 Project Name: Test  
 Sample Set Name: LOD\_LOQ\_Linearity\_Pyridine Met  
 Code column: Inertsil ODS-3, 4,6\*250 mm, 5 um

### SAMPLE INFORMATION

|                   |                     |                     |                                |
|-------------------|---------------------|---------------------|--------------------------------|
| Sample Name:      | Solution 0.2 ug/ mL | Date Acquired:      | 11.06.2022 15:11:29            |
| Sample Type:      | Standard            | Acq. Method Set:    | LOD_LOQ_Linearity_Pyridine_Met |
| Vial:             | 7                   | Date Processed:     | 20.02.2023 10:57:34            |
| Injection #:      | 2                   | Processing Method:  | Linearity_Pyridine_M_Methoxy   |
| Injection Volume: | 100,00 ul           | Channel Name:       | Extract 275,0                  |
| Run Time:         | 20,0 Minutes        | Proc. Chnl. Descr.: | PDA 275,0 nm, Smoothed by 25   |
| Acquired By:      | Roxana_Roman        |                     |                                |

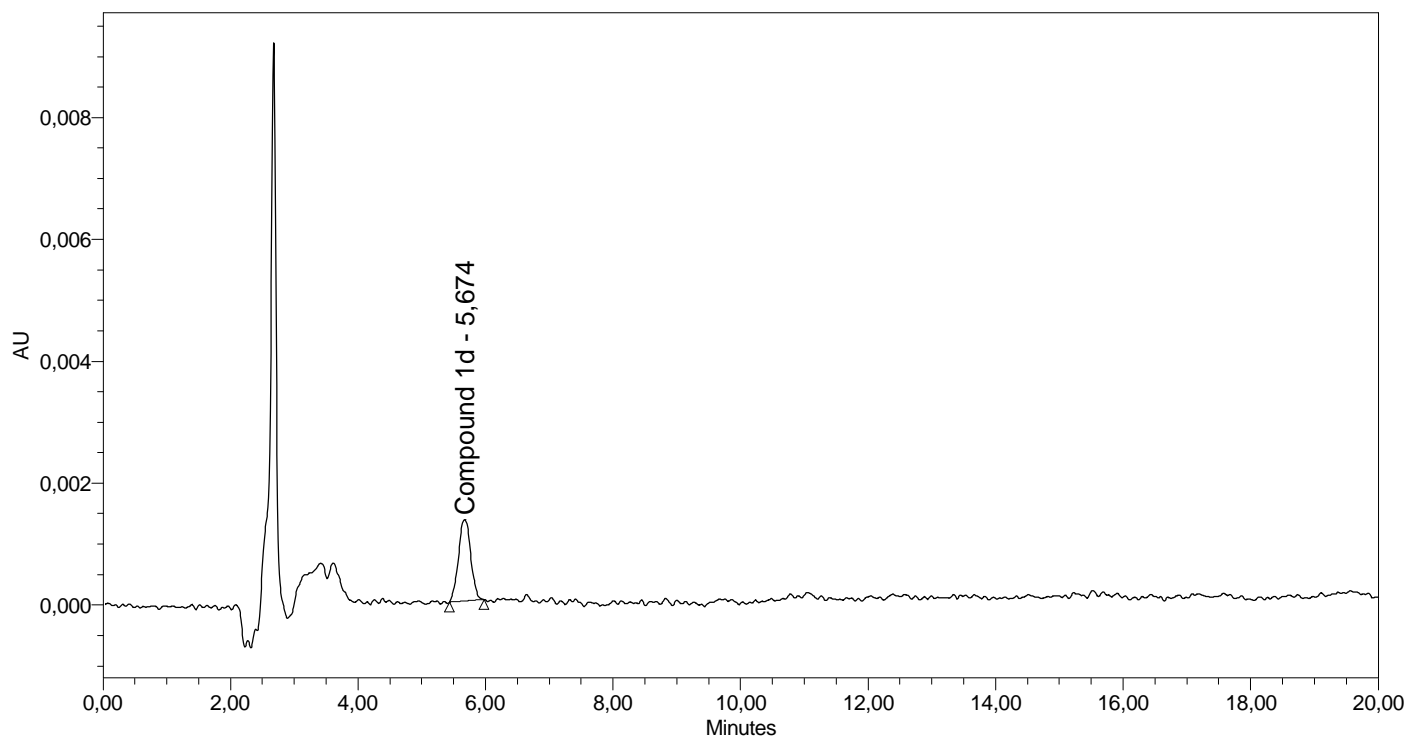

|   | Peak Name   | RT    | Area  | Height (µV) | Level |
|---|-------------|-------|-------|-------------|-------|
| 1 | Compound 1d | 5,674 | 17837 | 1333        | 20    |

## Seria Metoxi\_1d\_Linearity

Reported by User: Roxana Roman (Roxana\_Roman)  
 Acquisition Server: Waters7  
 Project Name: Test  
 Sample Set Name: Precision 1\_Accuracy\_PyridineM  
 Code column: Inertsil ODS-3, 4,6\*250 mm, 5 um

### SAMPLE INFORMATION

|                   |                           |                     |                                |
|-------------------|---------------------------|---------------------|--------------------------------|
| Sample Name:      | Methyl-pyridine 20 ug/ mL | Date Acquired:      | 11.06.2022 20:16:34            |
| Sample Type:      | Standard                  | Acq. Method Set:    | Precision 1_Accuracy_PyridineM |
| Vial:             | 26                        | Date Processed:     | 20.02.2023 10:53:56            |
| Injection #:      | 1                         | Processing Method:  | Linearity_Pyridine_M_Methoxy   |
| Injection Volume: | 100,00 ul                 | Channel Name:       | Extract 275,0                  |
| Run Time:         | 20,0 Minutes              | Proc. Chnl. Descr.: | PDA 275,0 nm, Smoothed by 25   |
| Acquired By:      | Roxana_Roman              |                     |                                |

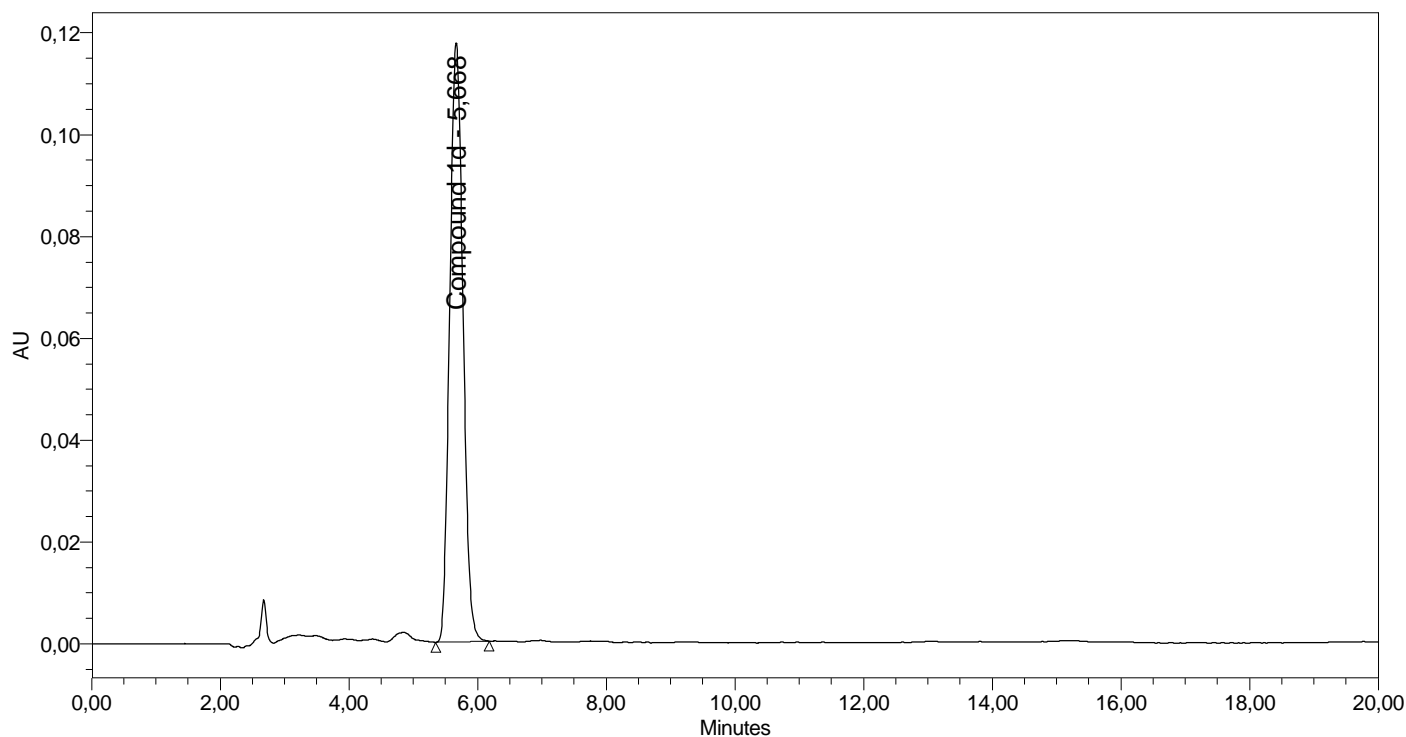

|   | Peak Name   | RT    | Area    | Height (μV) | Level |
|---|-------------|-------|---------|-------------|-------|
| 1 | Compound 1d | 5,668 | 1683470 | 117640      | 2000  |

## Seria Metoxi\_1d\_Linearity

Reported by User: Roxana Roman (Roxana\_Roman)  
 Acquisition Server: Waters7  
 Project Name: Test  
 Sample Set Name: Precision 1\_Accuracy\_PyridineM  
 Code column: Inertsil ODS-3, 4,6\*250 mm, 5 um

### SAMPLE INFORMATION

|                   |                           |                     |                                |
|-------------------|---------------------------|---------------------|--------------------------------|
| Sample Name:      | Methyl-pyridine 20 ug/ mL | Date Acquired:      | 11.06.2022 20:37:21            |
| Sample Type:      | Standard                  | Acq. Method Set:    | Precision 1_Accuracy_PyridineM |
| Vial:             | 27                        | Date Processed:     | 20.02.2023 10:53:57            |
| Injection #:      | 1                         | Processing Method:  | Linearity_Pyridine_M_Methoxy   |
| Injection Volume: | 100,00 ul                 | Channel Name:       | Extract 275,0                  |
| Run Time:         | 20,0 Minutes              | Proc. Chnl. Descr.: | PDA 275,0 nm, Smoothed by 25   |
| Acquired By:      | Roxana_Roman              |                     |                                |

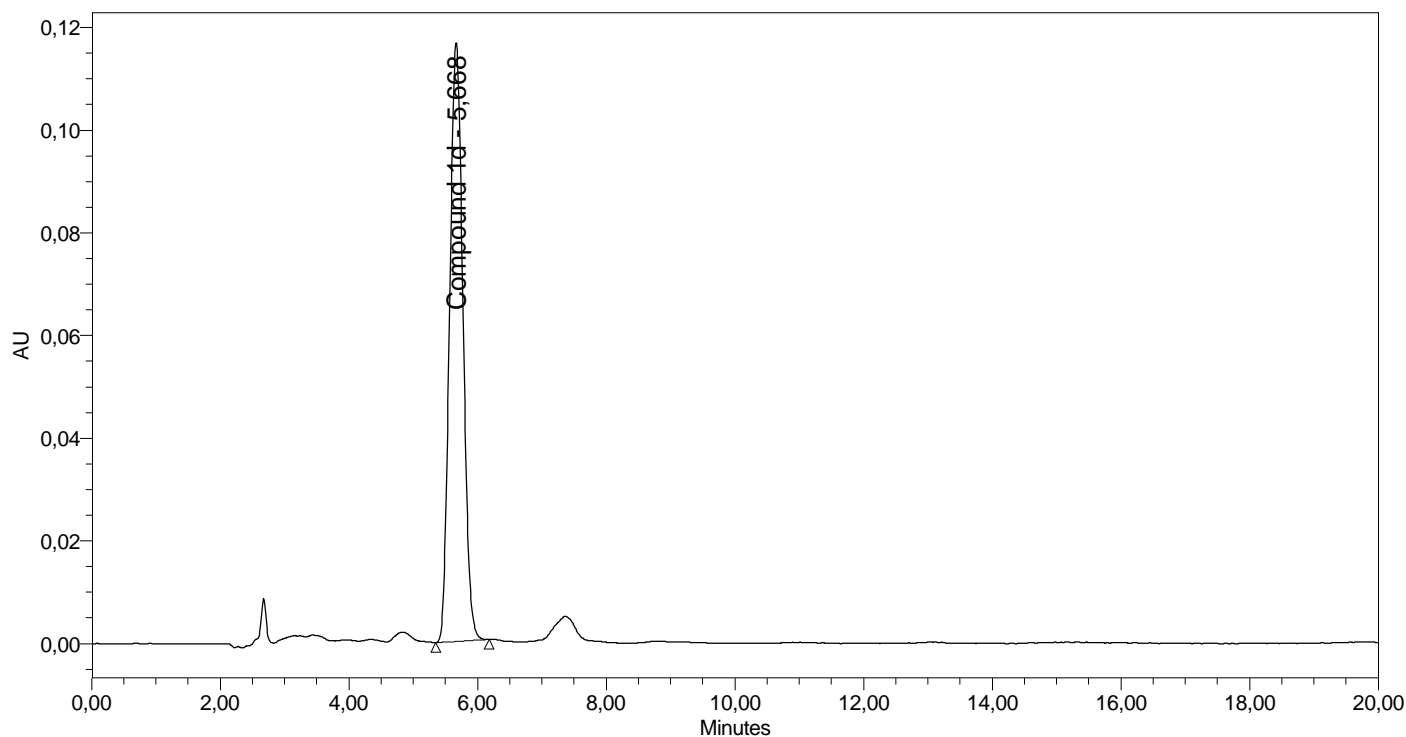

|   | Peak Name   | RT    | Area    | Height (μV) | Level |
|---|-------------|-------|---------|-------------|-------|
| 1 | Compound 1d | 5,668 | 1671584 | 116577      | 2000  |

## Seria Metoxi\_1d\_Linearity

Reported by User: Roxana Roman (Roxana\_Roman)  
 Acquisition Server: Waters7  
 Project Name: Test  
 Sample Set Name: Precision 1\_Accuracy\_PyridineM  
 Code column: Inertsil ODS-3, 4,6\*250 mm, 5 um

### SAMPLE INFORMATION

|                   |                           |                     |                                |
|-------------------|---------------------------|---------------------|--------------------------------|
| Sample Name:      | Methyl-pyridine 30 ug/ mL | Date Acquired:      | 11.06.2022 22:21:21            |
| Sample Type:      | Standard                  | Acq. Method Set:    | Precision 1_Accuracy_PyridineM |
| Vial:             | 32                        | Date Processed:     | 20.02.2023 10:54:00            |
| Injection #:      | 1                         | Processing Method:  | Linearity_Pyridine_M_Methoxy   |
| Injection Volume: | 100,00 ul                 | Channel Name:       | Extract 275,0                  |
| Run Time:         | 20,0 Minutes              | Proc. Chnl. Descr.: | PDA 275,0 nm, Smoothed by 25   |
| Acquired By:      | Roxana_Roman              |                     |                                |



|   | Peak Name   | RT    | Area    | Height (μV) | Level |
|---|-------------|-------|---------|-------------|-------|
| 1 | Compound 1d | 5,670 | 2518986 | 173649      | 3000  |

## Seria Metoxi\_1d\_Linearity

Reported by User: Roxana Roman (Roxana\_Roman)  
 Acquisition Server: Waters7  
 Project Name: Test  
 Sample Set Name: Precision 1\_Accuracy\_PyridineM  
 Code column: Inertsil ODS-3, 4,6\*250 mm, 5 um

### SAMPLE INFORMATION

|                   |                           |                     |                                |
|-------------------|---------------------------|---------------------|--------------------------------|
| Sample Name:      | Methyl-pyridine 30 ug/ mL | Date Acquired:      | 11.06.2022 22:42:09            |
| Sample Type:      | Standard                  | Acq. Method Set:    | Precision 1_Accuracy_PyridineM |
| Vial:             | 33                        | Date Processed:     | 20.02.2023 10:54:03            |
| Injection #:      | 1                         | Processing Method:  | Linearity_Pyridine_M_Methoxy   |
| Injection Volume: | 100,00 ul                 | Channel Name:       | Extract 275,0                  |
| Run Time:         | 20,0 Minutes              | Proc. Chnl. Descr.: | PDA 275,0 nm, Smoothed by 25   |
| Acquired By:      | Roxana_Roman              |                     |                                |



|   | Peak Name   | RT    | Area    | Height (μV) | Level |
|---|-------------|-------|---------|-------------|-------|
| 1 | Compound 1d | 5,668 | 2510959 | 173564      | 3000  |

## Seria Metoxi\_1d\_Linearity

Reported by User: Roxana Roman (Roxana\_Roman)  
 Acquisition Server: Waters7  
 Project Name: Test  
 Sample Set Name: Precision 1\_Accuracy\_PyridineM  
 Code column: Inertsil ODS-3, 4,6\*250 mm, 5 um

### SAMPLE INFORMATION

|                   |                           |                     |                                |
|-------------------|---------------------------|---------------------|--------------------------------|
| Sample Name:      | Methyl-pyridine 40 ug/ mL | Date Acquired:      | 12.06.2022 06:15:06            |
| Sample Type:      | Standard                  | Acq. Method Set:    | Precision 1_Accuracy_PyridineM |
| Vial:             | 38                        | Date Processed:     | 20.02.2023 11:03:38            |
| Injection #:      | 1                         | Processing Method:  | Linearity_Pyridine_M_Methoxy   |
| Injection Volume: | 100,00 ul                 | Channel Name:       | Extract 275,0                  |
| Run Time:         | 20,0 Minutes              | Proc. Chnl. Descr.: | PDA 275,0 nm, Smoothed by 25   |
| Acquired By:      | Roxana_Roman              |                     |                                |

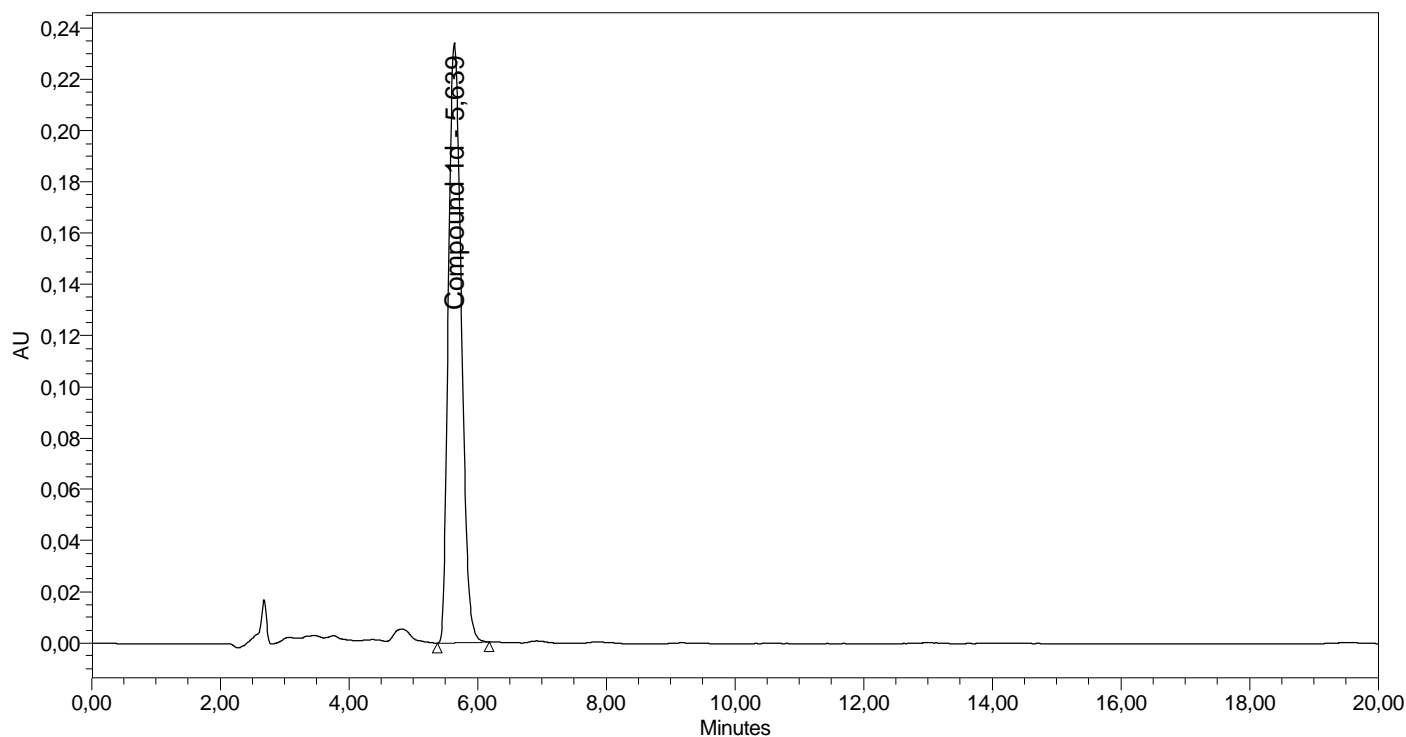

|   | Peak Name   | RT    | Area    | Height (μV) | Level |
|---|-------------|-------|---------|-------------|-------|
| 1 | Compound 1d | 5,639 | 3274981 | 234313      | 4000  |

## Seria Metoxi\_1d\_Linearity

Reported by User: Roxana Roman (Roxana\_Roman)  
 Acquisition Server: Waters7  
 Project Name: Test  
 Sample Set Name: Precision 1\_Accuracy\_PyridineM  
 Code column: Inertsil ODS-3, 4,6\*250 mm, 5 um

### SAMPLE INFORMATION

|                   |                           |                     |                                |
|-------------------|---------------------------|---------------------|--------------------------------|
| Sample Name:      | Methyl-pyridine 40 ug/ mL | Date Acquired:      | 12.06.2022 06:36:09            |
| Sample Type:      | Standard                  | Acq. Method Set:    | Precision 1_Accuracy_PyridineM |
| Vial:             | 39                        | Date Processed:     | 20.02.2023 11:03:52            |
| Injection #:      | 1                         | Processing Method:  | Linearity_Pyridine_M_Methoxy   |
| Injection Volume: | 100,00 ul                 | Channel Name:       | Extract 275,0                  |
| Run Time:         | 20,0 Minutes              | Proc. Chnl. Descr.: | PDA 275,0 nm, Smoothed by 25   |
| Acquired By:      | Roxana_Roman              |                     |                                |

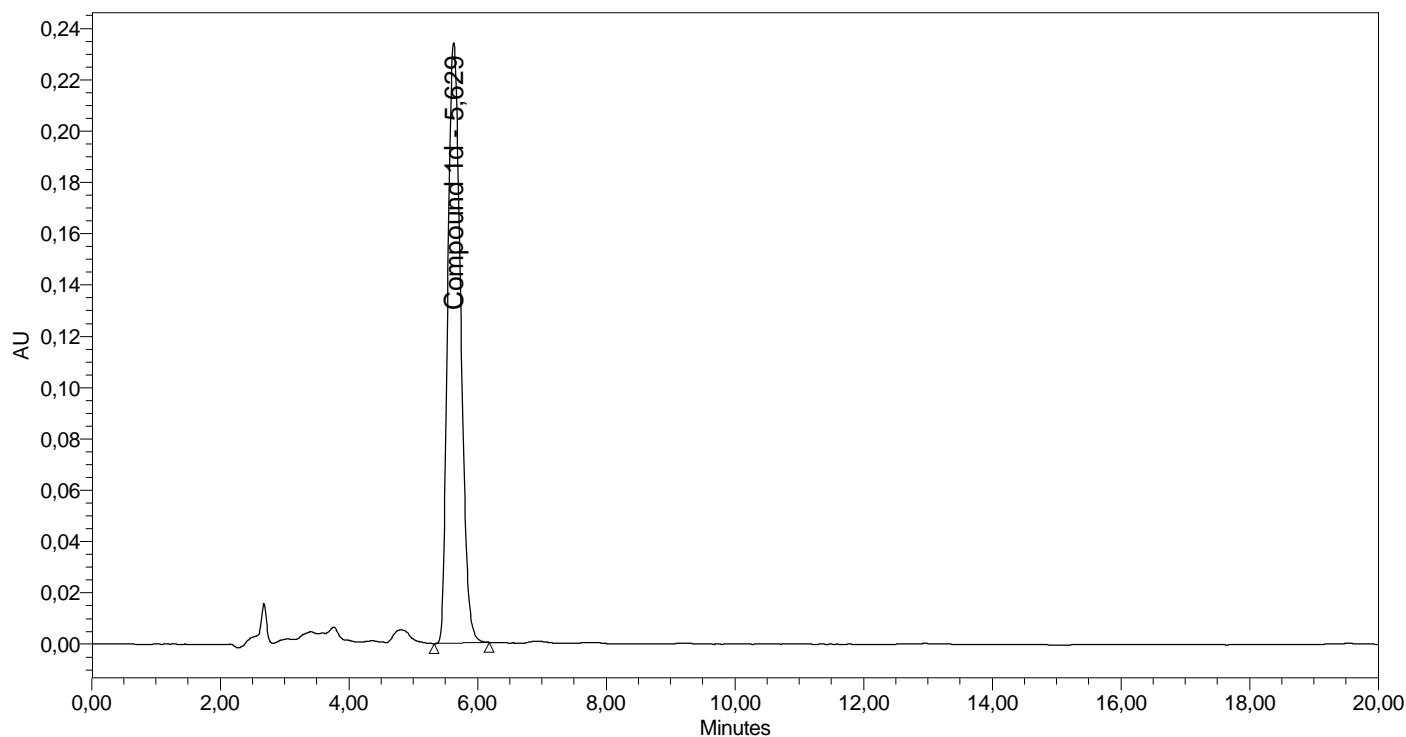

|   | Peak Name   | RT    | Area    | Height (μV) | Level |
|---|-------------|-------|---------|-------------|-------|
| 1 | Compound 1d | 5,629 | 3276413 | 234016      | 4000  |

**Quantitative determination of**  
***compound 1d***

**- Validation of the analytical method -**

Validation parameters:

- Specificity
- **Precision 1**
- Precision 2
- LOD – LOQ
- Linearity
- Range
- **Accuracy**



## Precision 1\_Accuracy\_1d\_Report

Reported by User: Roxana Roman (Roxana\_Roman)  
 Acquisition Server: Waters7  
 Project Name: Test  
 Sample Set Name: Precision 1\_Accuracy\_PyridineM  
 Code column: Inertsil ODS-3, 4,6\*250 mm, 5 um

### SAMPLE INFORMATION

|                   |                           |                     |                                |
|-------------------|---------------------------|---------------------|--------------------------------|
| Sample Name:      | Methyl-pyridine 30 ug/ mL | Date Acquired:      | 11.06.2022 18:49:07            |
| Sample Type:      | Standard                  | Acq. Method Set:    | Precision 1_Accuracy_PyridineM |
| Vial:             | 25                        | Date Processed:     | 16.02.2023 13:11:06            |
| Injection #:      | 1                         | Processing Method:  | Precision 1_Accuracy_PyridineM |
| Injection Volume: | 100,00 ul                 | Channel Name:       | Extract 275,0                  |
| Run Time:         | 20,0 Minutes              | Proc. Chnl. Descr.: | PDA 275,0 nm, Smoothed by 25   |
| Acquired By:      | Roxana_Roman              |                     |                                |



|   | Peak Name   | RT    | Area    | Height (μV) | Purity1 Angle | Purity1 Threshold | Purity1 Flag |
|---|-------------|-------|---------|-------------|---------------|-------------------|--------------|
| 1 | Compound 1d | 5,660 | 2504606 | 175677      | 0,082         | 0,279             | No           |

## Precision 1\_Accuracy\_1d\_Report

Reported by User: Roxana Roman (Roxana\_Roman)  
 Acquisition Server: Waters7  
 Project Name: Test  
 Sample Set Name: Precision 1\_Accuracy\_PyridineM  
 Code column: Inertsil ODS-3, 4,6\*250 mm, 5 um

### SAMPLE INFORMATION

|                   |                           |                     |                                |
|-------------------|---------------------------|---------------------|--------------------------------|
| Sample Name:      | Methyl-pyridine 30 ug/ mL | Date Acquired:      | 11.06.2022 19:09:51            |
| Sample Type:      | Standard                  | Acq. Method Set:    | Precision 1_Accuracy_PyridineM |
| Vial:             | 25                        | Date Processed:     | 16.02.2023 13:11:08            |
| Injection #:      | 2                         | Processing Method:  | Precision 1_Accuracy_PyridineM |
| Injection Volume: | 100,00 ul                 | Channel Name:       | Extract 275,0                  |
| Run Time:         | 20,0 Minutes              | Proc. Chnl. Descr.: | PDA 275,0 nm, Smoothed by 25   |
| Acquired By:      | Roxana_Roman              |                     |                                |

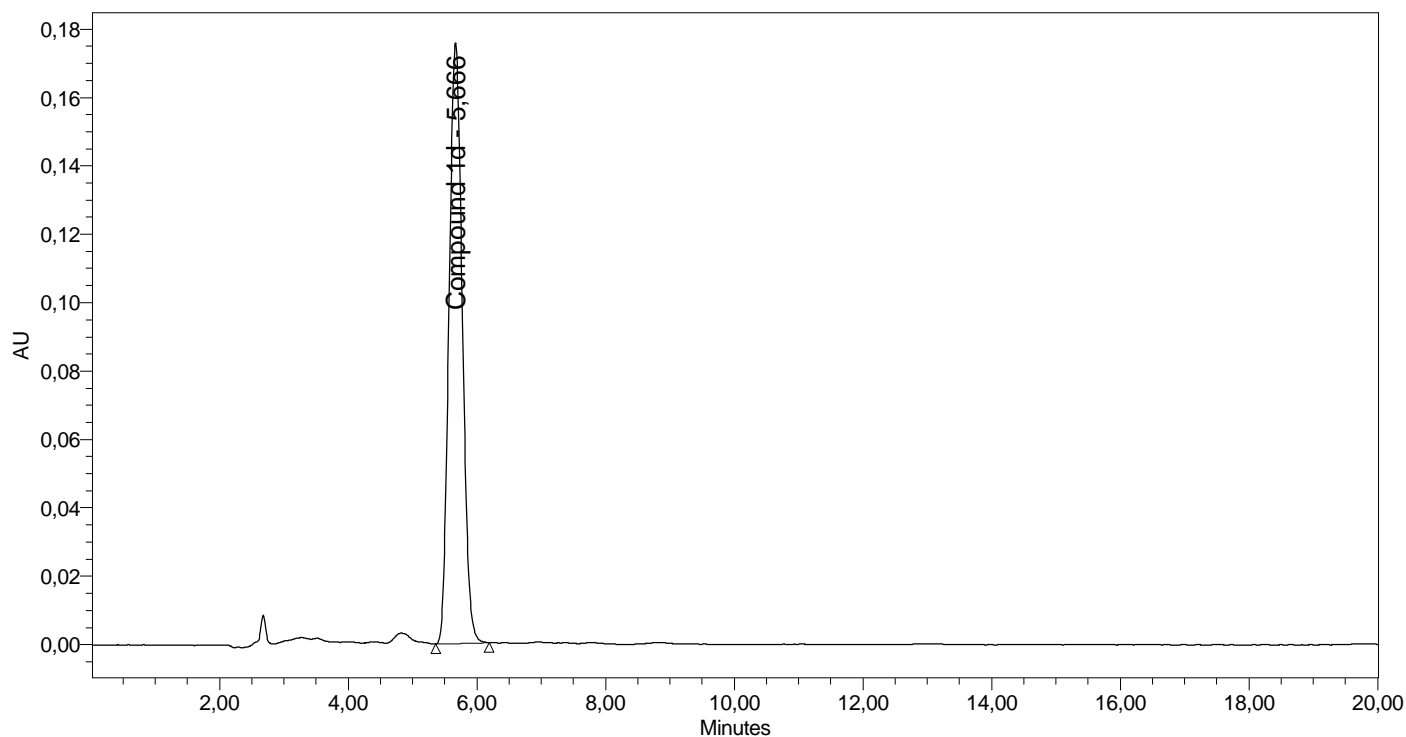

|   | Peak Name   | RT    | Area    | Height (μV) | Purity1 Angle | Purity1 Threshold | Purity1 Flag |
|---|-------------|-------|---------|-------------|---------------|-------------------|--------------|
| 1 | Compound 1d | 5,666 | 2511937 | 175638      | 0,077         | 0,278             | No           |

## Precision 1\_Accuracy\_1d\_Report

Reported by User: Roxana Roman (Roxana\_Roman)  
 Acquisition Server: Waters7  
 Project Name: Test  
 Sample Set Name: Precision 1\_Accuracy\_PyridineM  
 Code column: Inertsil ODS-3, 4,6\*250 mm, 5 um

### SAMPLE INFORMATION

|                   |                           |                     |                                |
|-------------------|---------------------------|---------------------|--------------------------------|
| Sample Name:      | Methyl-pyridine 30 ug/ mL | Date Acquired:      | 11.06.2022 19:30:35            |
| Sample Type:      | Standard                  | Acq. Method Set:    | Precision 1_Accuracy_PyridineM |
| Vial:             | 25                        | Date Processed:     | 16.02.2023 13:11:09            |
| Injection #:      | 3                         | Processing Method:  | Precision 1_Accuracy_PyridineM |
| Injection Volume: | 100,00 ul                 | Channel Name:       | Extract 275,0                  |
| Run Time:         | 20,0 Minutes              | Proc. Chnl. Descr.: | PDA 275,0 nm, Smoothed by 25   |
| Acquired By:      | Roxana_Roman              |                     |                                |



|   | Peak Name   | RT    | Area    | Height (μV) | Purity1 Angle | Purity1 Threshold | Purity1 Flag |
|---|-------------|-------|---------|-------------|---------------|-------------------|--------------|
| 1 | Compound 1d | 5,657 | 2512040 | 175781      | 0,085         | 0,280             | No           |

## Component Summary Area Time

Reported by User: Roxana Roman (Roxana\_Roman)  
Acquisition Server: Waters7  
Project Name: Test  
Sample Set Name: Precision 1\_Accuracy\_PyridineM  
Code column: Inertsil ODS-3, 4,6\*250 mm, 5 um

### Component Summary For Retention Time Channel: W2996

|           | SampleName                | Inj | Channel | Vial | Compound 1d |
|-----------|---------------------------|-----|---------|------|-------------|
| 1         | Methyl-pyridine 30 ug/ mL | 1   | W2996   | 25   | 5,660       |
| 2         | Methyl-pyridine 30 ug/ mL | 2   | W2996   | 25   | 5,666       |
| 3         | Methyl-pyridine 30 ug/ mL | 3   | W2996   | 25   | 5,657       |
| Mean      |                           |     |         |      | 5,661       |
| Std. Dev. |                           |     |         |      | 0,004       |
| % RSD     |                           |     |         |      | 0,08        |

### Component Summary For Area Channel: W2996

|           | SampleName                | Inj | Channel | Vial | Compound 1d |
|-----------|---------------------------|-----|---------|------|-------------|
| 1         | Methyl-pyridine 30 ug/ mL | 1   | W2996   | 25   | 2504606     |
| 2         | Methyl-pyridine 30 ug/ mL | 2   | W2996   | 25   | 2511937     |
| 3         | Methyl-pyridine 30 ug/ mL | 3   | W2996   | 25   | 2512040     |
| Mean      |                           |     |         |      | 2509528     |
| Std. Dev. |                           |     |         |      | 4263        |
| % RSD     |                           |     |         |      | 0,17        |

## Precision 1\_Accuracy\_1d\_Report

Reported by User: Roxana Roman (Roxana\_Roman)  
 Acquisition Server: Waters7  
 Project Name: Test  
 Sample Set Name: Precision 1\_Accuracy\_PyridineM  
 Code column: Inertsil ODS-3, 4,6\*250 mm, 5 um

### SAMPLE INFORMATION

|                   |              |                     |                                |
|-------------------|--------------|---------------------|--------------------------------|
| Sample Name:      | Methanol     | Date Acquired:      | 11.06.2022 18:28:06            |
| Sample Type:      | Standard     | Acq. Method Set:    | Precision 1_Accuracy_PyridineM |
| Vial:             | 11           | Date Processed:     | 18.02.2023 09:25:05            |
| Injection #:      | 1            | Processing Method:  | Precision 1_Accuracy_PyridineM |
| Injection Volume: | 100,00 ul    | Channel Name:       | Extract 275,0                  |
| Run Time:         | 20,0 Minutes | Proc. Chnl. Descr.: | PDA 275,0 nm, Smoothed by 25   |
| Acquired By:      | Roxana_Roman |                     |                                |



Basic LC Peaks Table group contains no data.

## Precision 1\_Accuracy\_1d\_Report

Reported by User: Roxana Roman (Roxana\_Roman)  
 Acquisition Server: Waters7  
 Project Name: Test  
 Sample Set Name: Precision 1\_Accuracy\_PyridineM  
 Code column: Inertsil ODS-3, 4,6\*250 mm, 5 um

### SAMPLE INFORMATION

|                   |                           |                     |                                |
|-------------------|---------------------------|---------------------|--------------------------------|
| Sample Name:      | Methyl-pyridine 20 ug/ mL | Date Acquired:      | 11.06.2022 20:16:34            |
| Sample Type:      | Unknown                   | Acq. Method Set:    | Precision 1_Accuracy_PyridineM |
| Vial:             | 26                        | Date Processed:     | 16.02.2023 13:11:12            |
| Injection #:      | 1                         | Processing Method:  | Precision 1_Accuracy_PyridineM |
| Injection Volume: | 100,00 ul                 | Channel Name:       | Extract 275,0                  |
| Run Time:         | 20,0 Minutes              | Proc. Chnl. Descr.: | PDA 275,0 nm, Smoothed by 25   |
| Acquired By:      | Roxana_Roman              |                     |                                |



|   | Peak Name   | RT    | Area    | Height (μV) | Purity1 Angle | Purity1 Threshold | Purity1 Flag |
|---|-------------|-------|---------|-------------|---------------|-------------------|--------------|
| 1 | Compound 1d | 5,668 | 1683470 | 117640      | 0,107         | 0,281             | No           |

## Precision 1\_Accuracy\_1d\_Report

Reported by User: Roxana Roman (Roxana\_Roman)  
 Acquisition Server: Waters7  
 Project Name: Test  
 Sample Set Name: Precision 1\_Accuracy\_PyridineM  
 Code column: Inertsil ODS-3, 4,6\*250 mm, 5 um

### SAMPLE INFORMATION

|                   |                           |                     |                                |
|-------------------|---------------------------|---------------------|--------------------------------|
| Sample Name:      | Methyl-pyridine 20 ug/ mL | Date Acquired:      | 11.06.2022 20:37:21            |
| Sample Type:      | Unknown                   | Acq. Method Set:    | Precision 1_Accuracy_PyridineM |
| Vial:             | 27                        | Date Processed:     | 16.02.2023 13:11:13            |
| Injection #:      | 1                         | Processing Method:  | Precision 1_Accuracy_PyridineM |
| Injection Volume: | 100,00 ul                 | Channel Name:       | Extract 275,0                  |
| Run Time:         | 20,0 Minutes              | Proc. Chnl. Descr.: | PDA 275,0 nm, Smoothed by 25   |
| Acquired By:      | Roxana_Roman              |                     |                                |



|   | Peak Name   | RT    | Area    | Height (μV) | Purity1 Angle | Purity1 Threshold | Purity1 Flag |
|---|-------------|-------|---------|-------------|---------------|-------------------|--------------|
| 1 | Compound 1d | 5,668 | 1671584 | 116577      | 0,158         | 0,289             | No           |

## Precision 1\_Accuracy\_1d\_Report

Reported by User: Roxana Roman (Roxana\_Roman)  
 Acquisition Server: Waters7  
 Project Name: Test  
 Sample Set Name: Precision 1\_Accuracy\_PyridineM  
 Code column: Inertsil ODS-3, 4,6\*250 mm, 5 um

### SAMPLE INFORMATION

|                   |                           |                     |                                |
|-------------------|---------------------------|---------------------|--------------------------------|
| Sample Name:      | Methyl-pyridine 20 ug/ mL | Date Acquired:      | 11.06.2022 20:58:09            |
| Sample Type:      | Unknown                   | Acq. Method Set:    | Precision 1_Accuracy_PyridineM |
| Vial:             | 28                        | Date Processed:     | 16.02.2023 13:12:01            |
| Injection #:      | 1                         | Processing Method:  | Precision 1_Accuracy_PyridineM |
| Injection Volume: | 100,00 ul                 | Channel Name:       | Extract 275,0                  |
| Run Time:         | 20,0 Minutes              | Proc. Chnl. Descr.: | PDA 275,0 nm, Smoothed by 25   |
| Acquired By:      | Roxana_Roman              |                     |                                |

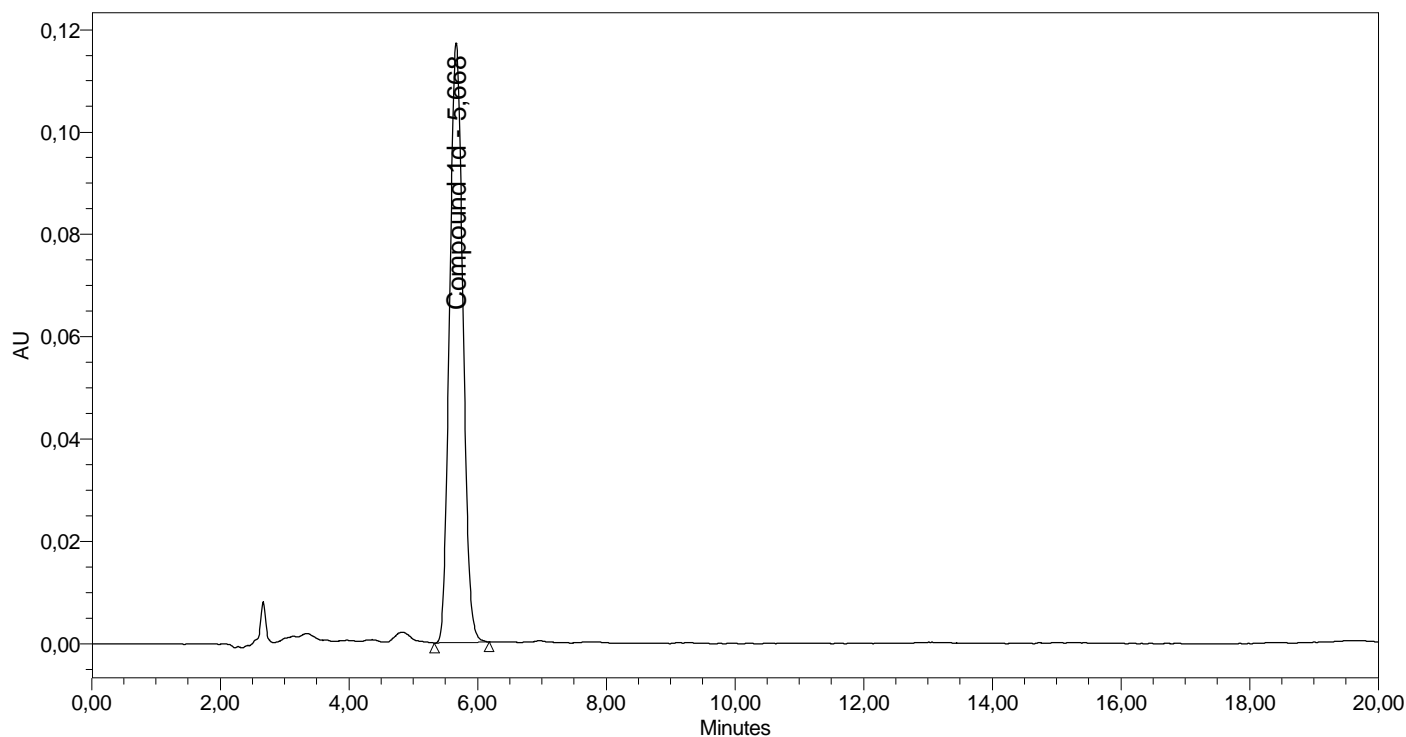

|   | Peak Name   | RT    | Area    | Height (μV) | Purity1 Angle | Purity1 Threshold | Purity1 Flag |
|---|-------------|-------|---------|-------------|---------------|-------------------|--------------|
| 1 | Compound 1d | 5,668 | 1692685 | 117186      | 0,111         | 0,278             | No           |



## Precision 1\_Accuracy\_1d\_Report

Reported by User: Roxana Roman (Roxana\_Roman)  
 Acquisition Server: Waters7  
 Project Name: Test  
 Sample Set Name: Precision 1\_Accuracy\_PyridineM  
 Code column: Inertsil ODS-3, 4,6\*250 mm, 5 um

### SAMPLE INFORMATION

|                   |                           |                     |                                |
|-------------------|---------------------------|---------------------|--------------------------------|
| Sample Name:      | Methyl-pyridine 20 ug/ mL | Date Acquired:      | 11.06.2022 21:18:57            |
| Sample Type:      | Unknown                   | Acq. Method Set:    | Precision 1_Accuracy_PyridineM |
| Vial:             | 29                        | Date Processed:     | 16.02.2023 13:12:15            |
| Injection #:      | 1                         | Processing Method:  | Precision 1_Accuracy_PyridineM |
| Injection Volume: | 100,00 ul                 | Channel Name:       | Extract 275,0                  |
| Run Time:         | 20,0 Minutes              | Proc. Chnl. Descr.: | PDA 275,0 nm, Smoothed by 25   |
| Acquired By:      | Roxana_Roman              |                     |                                |

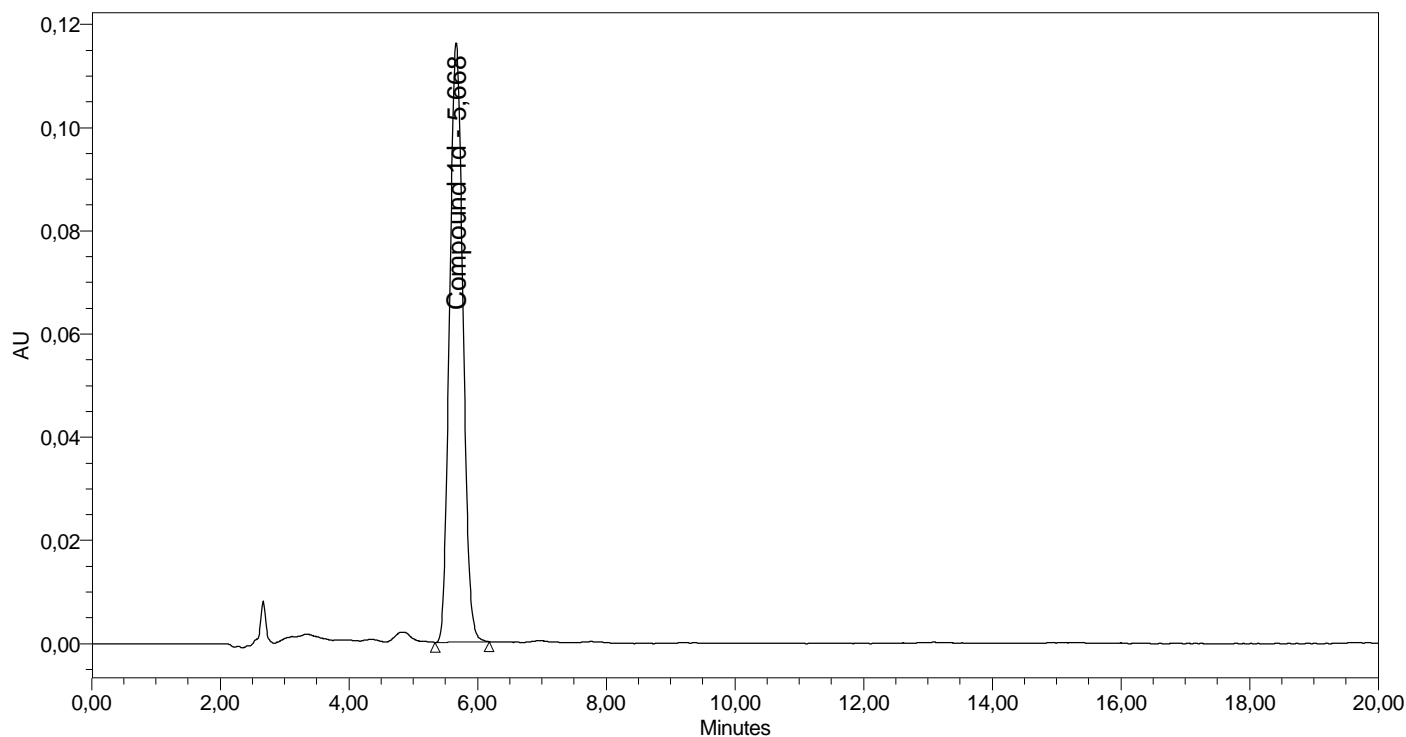

|   | Peak Name   | RT    | Area    | Height (μV) | Purity1 Angle | Purity1 Threshold | Purity1 Flag |
|---|-------------|-------|---------|-------------|---------------|-------------------|--------------|
| 1 | Compound 1d | 5,668 | 1676085 | 116109      | 0,114         | 0,285             | No           |

## Precision 1\_Accuracy\_1d\_Report

Reported by User: Roxana Roman (Roxana\_Roman)  
 Acquisition Server: Waters7  
 Project Name: Test  
 Sample Set Name: Precision 1\_Accuracy\_PyridineM  
 Code column: Inertsil ODS-3, 4,6\*250 mm, 5 um

### SAMPLE INFORMATION

|                   |                           |                     |                                |
|-------------------|---------------------------|---------------------|--------------------------------|
| Sample Name:      | Methyl-pyridine 20 ug/ mL | Date Acquired:      | 11.06.2022 21:39:46            |
| Sample Type:      | Unknown                   | Acq. Method Set:    | Precision 1_Accuracy_PyridineM |
| Vial:             | 30                        | Date Processed:     | 16.02.2023 13:12:25            |
| Injection #:      | 1                         | Processing Method:  | Precision 1_Accuracy_PyridineM |
| Injection Volume: | 100,00 ul                 | Channel Name:       | Extract 275,0                  |
| Run Time:         | 20,0 Minutes              | Proc. Chnl. Descr.: | PDA 275,0 nm, Smoothed by 25   |
| Acquired By:      | Roxana_Roman              |                     |                                |

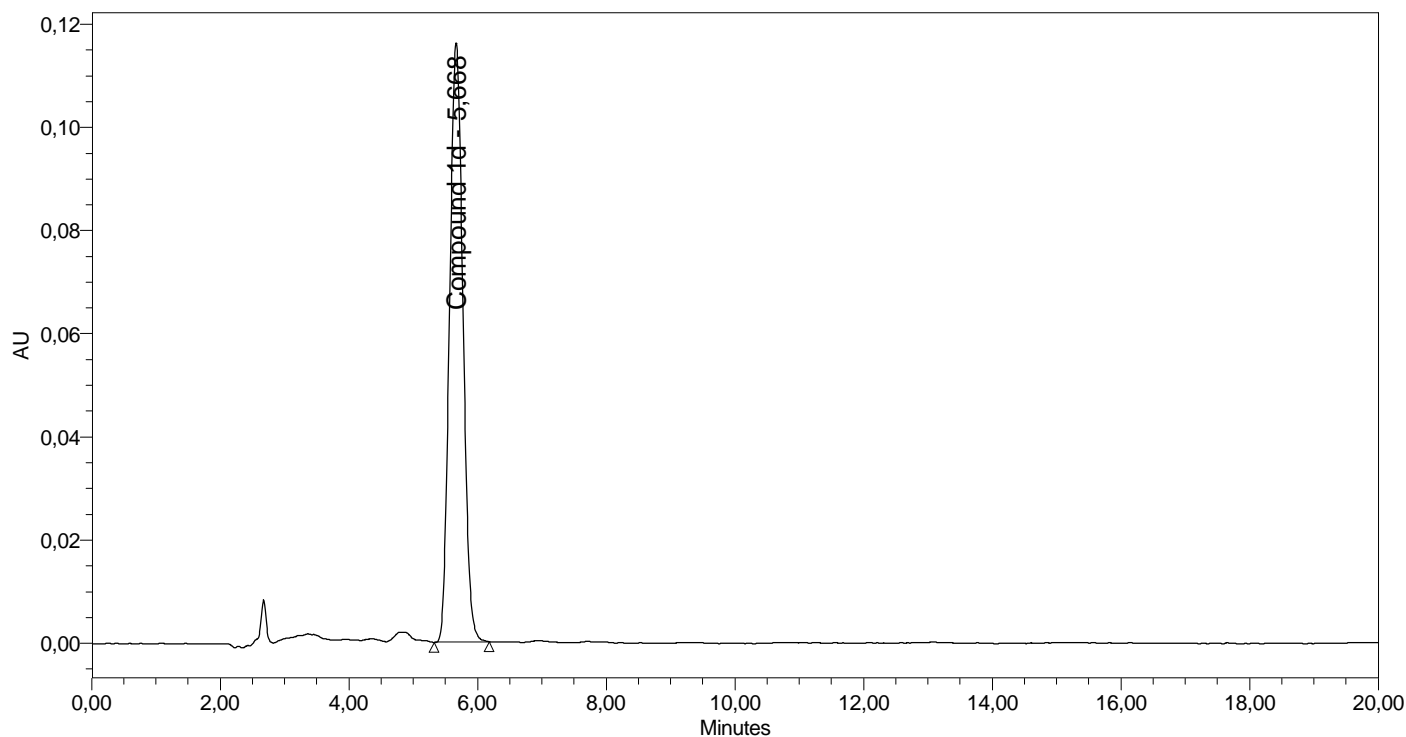

|   | Peak Name   | RT    | Area    | Height (µV) | Purity1 Angle | Purity1 Threshold | Purity1 Flag |
|---|-------------|-------|---------|-------------|---------------|-------------------|--------------|
| 1 | Compound 1d | 5,668 | 1674530 | 116125      | 0,126         | 0,285             | No           |

## Precision 1\_Accuracy\_1d\_Report

Reported by User: Roxana Roman (Roxana\_Roman)  
 Acquisition Server: Waters7  
 Project Name: Test  
 Sample Set Name: Precision 1\_Accuracy\_PyridineM  
 Code column: Inertsil ODS-3, 4,6\*250 mm, 5 um

### SAMPLE INFORMATION

|                   |                           |                     |                                |
|-------------------|---------------------------|---------------------|--------------------------------|
| Sample Name:      | Methyl-pyridine 20 ug/ mL | Date Acquired:      | 11.06.2022 22:00:33            |
| Sample Type:      | Unknown                   | Acq. Method Set:    | Precision 1_Accuracy_PyridineM |
| Vial:             | 31                        | Date Processed:     | 16.02.2023 13:12:35            |
| Injection #:      | 1                         | Processing Method:  | Precision 1_Accuracy_PyridineM |
| Injection Volume: | 100,00 ul                 | Channel Name:       | Extract 275,0                  |
| Run Time:         | 20,0 Minutes              | Proc. Chnl. Descr.: | PDA 275,0 nm, Smoothed by 25   |
| Acquired By:      | Roxana_Roman              |                     |                                |

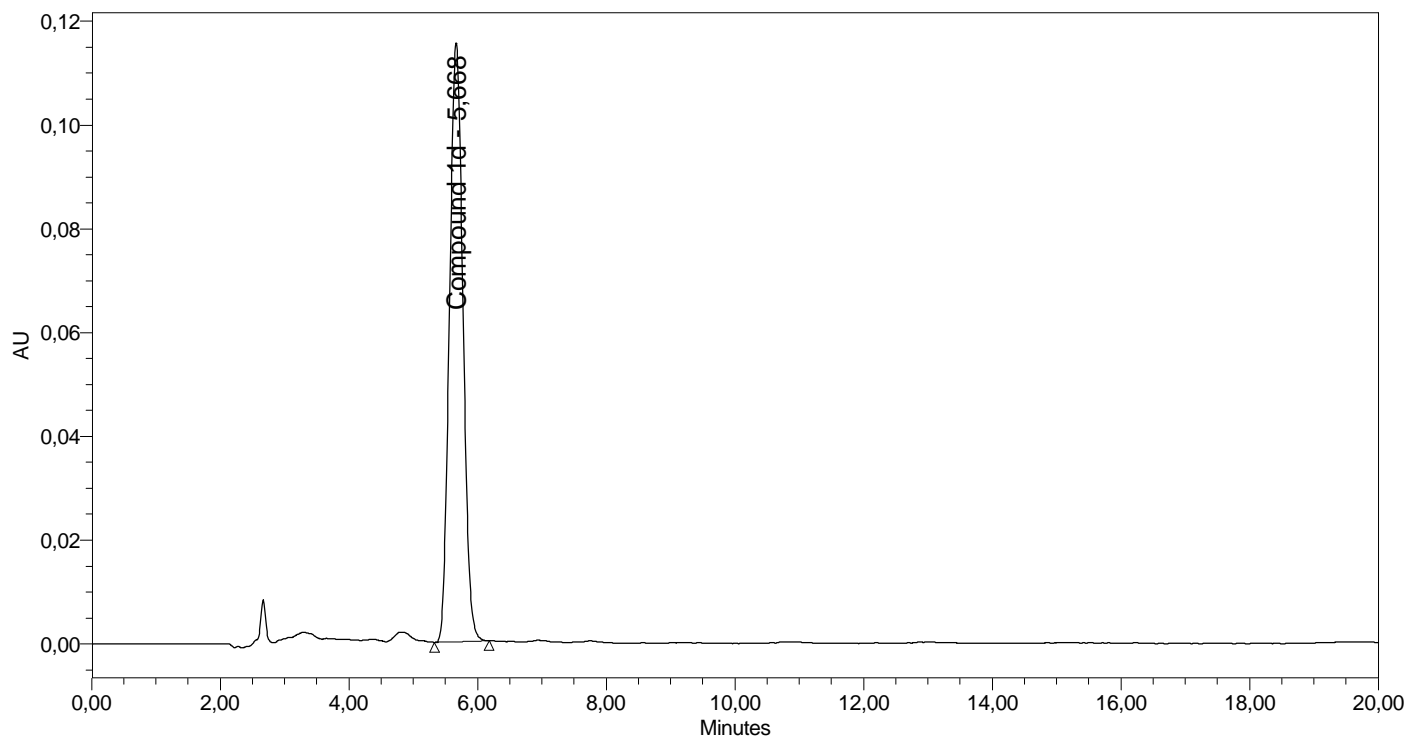

|   | Peak Name   | RT    | Area    | Height (μV) | Purity1 Angle | Purity1 Threshold | Purity1 Flag |
|---|-------------|-------|---------|-------------|---------------|-------------------|--------------|
| 1 | Compound 1d | 5,668 | 1675112 | 115410      | 0,117         | 0,281             | No           |

## Precision 1\_Accuracy\_1d\_Report

Reported by User: Roxana Roman (Roxana\_Roman)  
 Acquisition Server: Waters7  
 Project Name: Test  
 Sample Set Name: Precision 1\_Accuracy\_PyridineM  
 Code column: Inertsil ODS-3, 4,6\*250 mm, 5 um

### SAMPLE INFORMATION

|                   |                           |                     |                                |
|-------------------|---------------------------|---------------------|--------------------------------|
| Sample Name:      | Methyl-pyridine 30 ug/ mL | Date Acquired:      | 11.06.2022 22:21:21            |
| Sample Type:      | Unknown                   | Acq. Method Set:    | Precision 1_Accuracy_PyridineM |
| Vial:             | 32                        | Date Processed:     | 16.02.2023 13:12:52            |
| Injection #:      | 1                         | Processing Method:  | Precision 1_Accuracy_PyridineM |
| Injection Volume: | 100,00 ul                 | Channel Name:       | Extract 275,0                  |
| Run Time:         | 20,0 Minutes              | Proc. Chnl. Descr.: | PDA 275,0 nm, Smoothed by 25   |
| Acquired By:      | Roxana_Roman              |                     |                                |



|   | Peak Name   | RT    | Area    | Height (μV) | Purity1 Angle | Purity1 Threshold | Purity1 Flag |
|---|-------------|-------|---------|-------------|---------------|-------------------|--------------|
| 1 | Compound 1d | 5,670 | 2518986 | 173649      | 0,081         | 0,279             | No           |

## Precision 1\_Accuracy\_1d\_Report

Reported by User: Roxana Roman (Roxana\_Roman)  
 Acquisition Server: Waters7  
 Project Name: Test  
 Sample Set Name: Precision 1\_Accuracy\_PyridineM  
 Code column: Inertsil ODS-3, 4,6\*250 mm, 5 um

### SAMPLE INFORMATION

|                   |                           |                     |                                |
|-------------------|---------------------------|---------------------|--------------------------------|
| Sample Name:      | Methyl-pyridine 30 ug/ mL | Date Acquired:      | 11.06.2022 22:42:09            |
| Sample Type:      | Unknown                   | Acq. Method Set:    | Precision 1_Accuracy_PyridineM |
| Vial:             | 33                        | Date Processed:     | 16.02.2023 13:13:03            |
| Injection #:      | 1                         | Processing Method:  | Precision 1_Accuracy_PyridineM |
| Injection Volume: | 100,00 ul                 | Channel Name:       | Extract 275,0                  |
| Run Time:         | 20,0 Minutes              | Proc. Chnl. Descr.: | PDA 275,0 nm, Smoothed by 25   |
| Acquired By:      | Roxana_Roman              |                     |                                |



|   | Peak Name   | RT    | Area    | Height (μV) | Purity1 Angle | Purity1 Threshold | Purity1 Flag |
|---|-------------|-------|---------|-------------|---------------|-------------------|--------------|
| 1 | Compound 1d | 5,668 | 2510959 | 173564      | 0,080         | 0,280             | No           |

## Precision 1\_Accuracy\_1d\_Report

Reported by User: Roxana Roman (Roxana\_Roman)  
 Acquisition Server: Waters7  
 Project Name: Test  
 Sample Set Name: Precision 1\_Accuracy\_PyridineM  
 Code column: Inertsil ODS-3, 4,6\*250 mm, 5 um

### SAMPLE INFORMATION

|                   |                           |                     |                                |
|-------------------|---------------------------|---------------------|--------------------------------|
| Sample Name:      | Methyl-pyridine 30 ug/ mL | Date Acquired:      | 11.06.2022 23:02:57            |
| Sample Type:      | Unknown                   | Acq. Method Set:    | Precision 1_Accuracy_PyridineM |
| Vial:             | 34                        | Date Processed:     | 16.02.2023 13:13:11            |
| Injection #:      | 1                         | Processing Method:  | Precision 1_Accuracy_PyridineM |
| Injection Volume: | 100,00 ul                 | Channel Name:       | Extract 275,0                  |
| Run Time:         | 20,0 Minutes              | Proc. Chnl. Descr.: | PDA 275,0 nm, Smoothed by 25   |
| Acquired By:      | Roxana_Roman              |                     |                                |

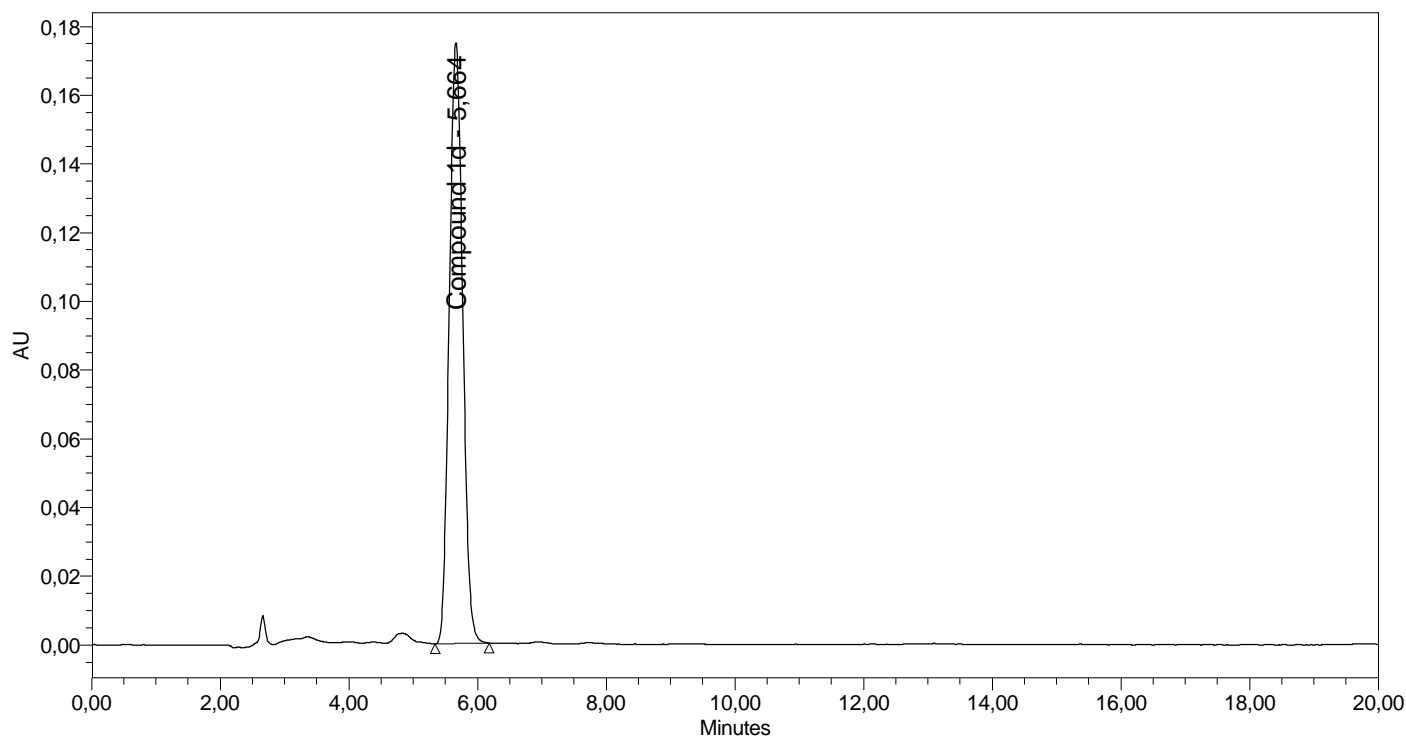

|   | Peak Name   | RT    | Area    | Height (μV) | Purity1 Angle | Purity1 Threshold | Purity1 Flag |
|---|-------------|-------|---------|-------------|---------------|-------------------|--------------|
| 1 | Compound 1d | 5,664 | 2537030 | 174826      | 0,082         | 0,284             | No           |

## Precision 1\_Accuracy\_1d\_Report

Reported by User: Roxana Roman (Roxana\_Roman)  
 Acquisition Server: Waters7  
 Project Name: Test  
 Sample Set Name: Precision 1\_Accuracy\_PyridineM  
 Code column: Inertsil ODS-3, 4,6\*250 mm, 5 um

### SAMPLE INFORMATION

|                   |                           |                     |                                |
|-------------------|---------------------------|---------------------|--------------------------------|
| Sample Name:      | Methyl-pyridine 30 ug/ mL | Date Acquired:      | 11.06.2022 23:23:45            |
| Sample Type:      | Unknown                   | Acq. Method Set:    | Precision 1_Accuracy_PyridineM |
| Vial:             | 35                        | Date Processed:     | 16.02.2023 13:13:19            |
| Injection #:      | 1                         | Processing Method:  | Precision 1_Accuracy_PyridineM |
| Injection Volume: | 100,00 ul                 | Channel Name:       | Extract 275,0                  |
| Run Time:         | 20,0 Minutes              | Proc. Chnl. Descr.: | PDA 275,0 nm, Smoothed by 25   |
| Acquired By:      | Roxana_Roman              |                     |                                |

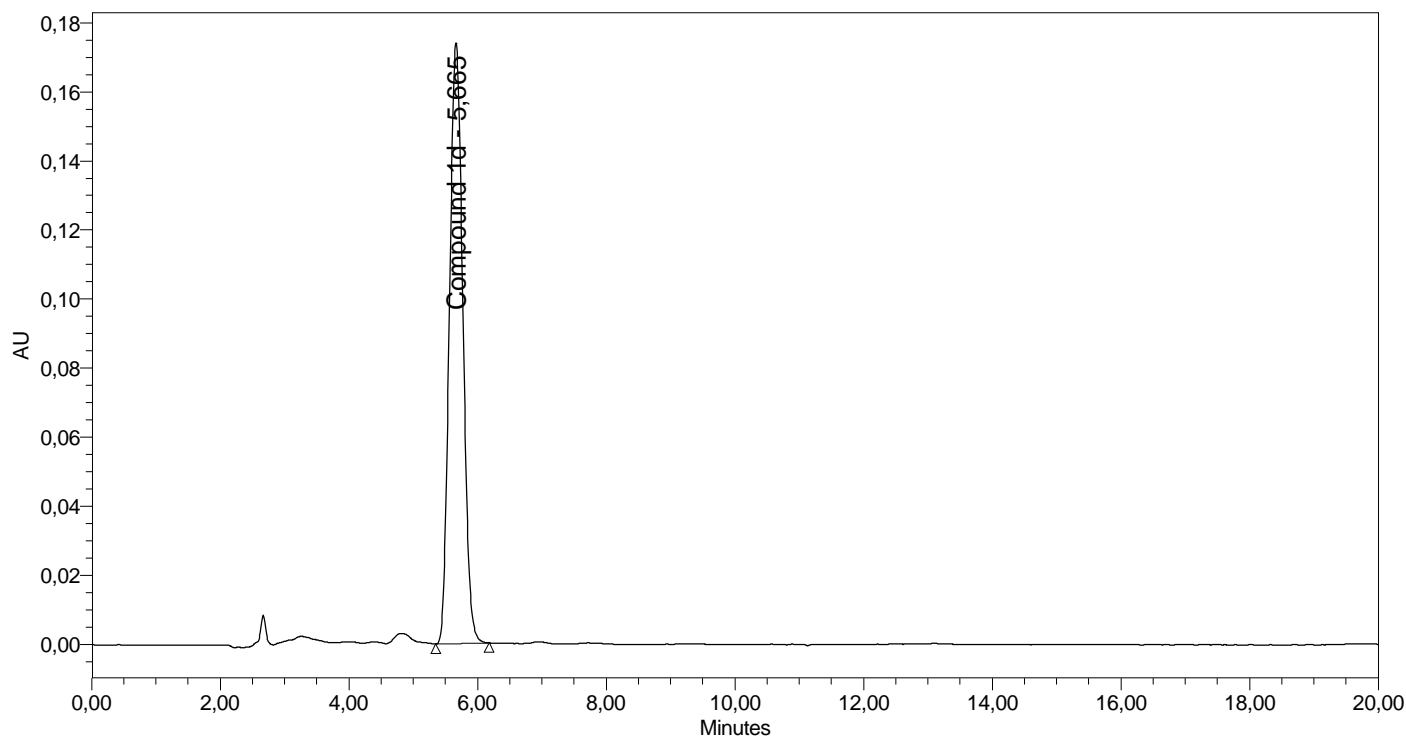

|   | Peak Name   | RT    | Area    | Height (μV) | Purity1 Angle | Purity1 Threshold | Purity1 Flag |
|---|-------------|-------|---------|-------------|---------------|-------------------|--------------|
| 1 | Compound 1d | 5,665 | 2510454 | 173931      | 0,079         | 0,280             | No           |

## Precision 1\_Accuracy\_1d\_Report

Reported by User: Roxana Roman (Roxana\_Roman)  
 Acquisition Server: Waters7  
 Project Name: Test  
 Sample Set Name: Precision 1\_Accuracy\_PyridineM  
 Code column: Inertsil ODS-3, 4,6\*250 mm, 5 um

### SAMPLE INFORMATION

|                   |                           |                     |                                |
|-------------------|---------------------------|---------------------|--------------------------------|
| Sample Name:      | Methyl-pyridine 30 ug/ mL | Date Acquired:      | 11.06.2022 23:44:33            |
| Sample Type:      | Unknown                   | Acq. Method Set:    | Precision 1_Accuracy_PyridineM |
| Vial:             | 36                        | Date Processed:     | 16.02.2023 13:13:28            |
| Injection #:      | 1                         | Processing Method:  | Precision 1_Accuracy_PyridineM |
| Injection Volume: | 100,00 ul                 | Channel Name:       | Extract 275,0                  |
| Run Time:         | 20,0 Minutes              | Proc. Chnl. Descr.: | PDA 275,0 nm, Smoothed by 25   |
| Acquired By:      | Roxana_Roman              |                     |                                |

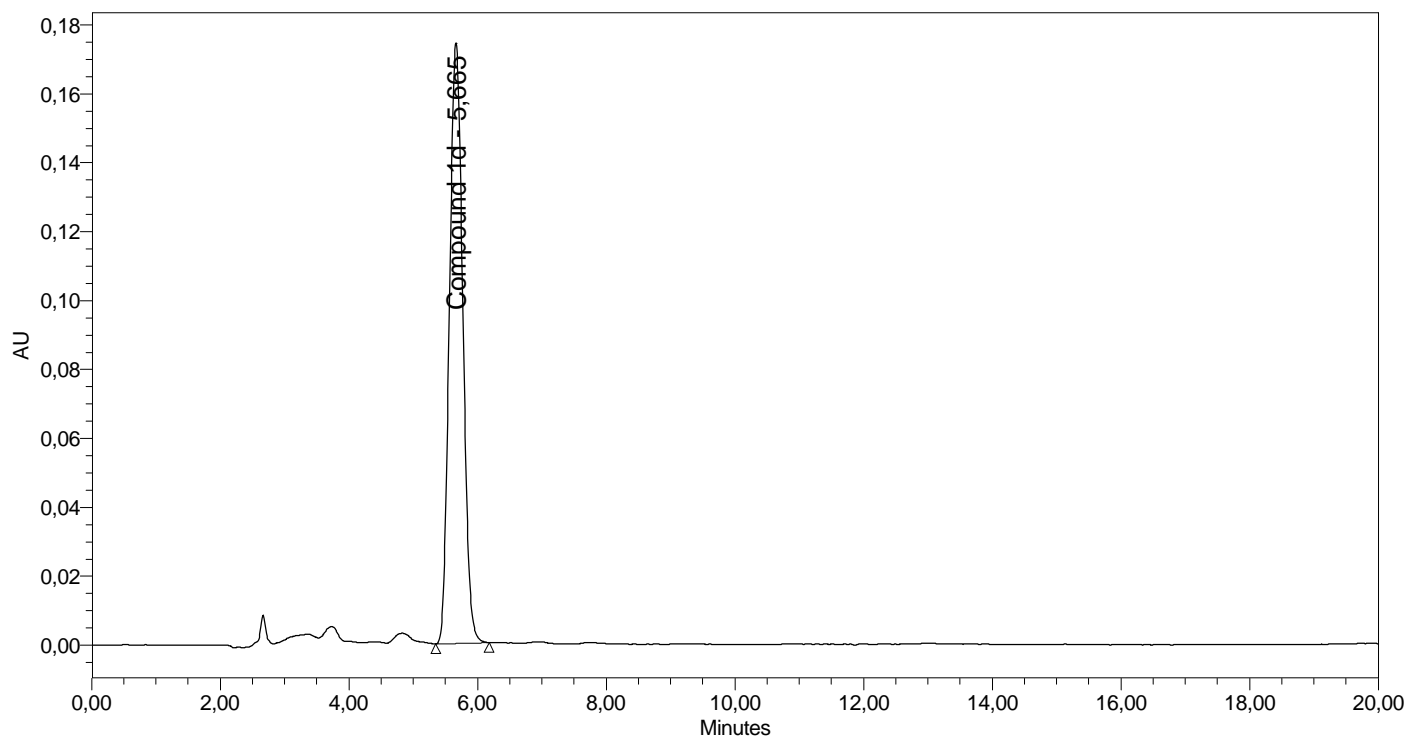

|   | Peak Name   | RT    | Area    | Height (μV) | Purity1 Angle | Purity1 Threshold | Purity1 Flag |
|---|-------------|-------|---------|-------------|---------------|-------------------|--------------|
| 1 | Compound 1d | 5,665 | 2518396 | 174269      | 0,080         | 0,279             | No           |



## Precision 1\_Accuracy\_1d\_Report

Reported by User: Roxana Roman (Roxana\_Roman)  
 Acquisition Server: Waters7  
 Project Name: Test  
 Sample Set Name: Precision 1\_Accuracy\_PyridineM  
 Code column: Inertsil ODS-3, 4,6\*250 mm, 5 um

### SAMPLE INFORMATION

|                   |                           |                     |                                |
|-------------------|---------------------------|---------------------|--------------------------------|
| Sample Name:      | Methyl-pyridine 30 ug/ mL | Date Acquired:      | 12.06.2022 00:05:21            |
| Sample Type:      | Unknown                   | Acq. Method Set:    | Precision 1_Accuracy_PyridineM |
| Vial:             | 37                        | Date Processed:     | 16.02.2023 13:13:38            |
| Injection #:      | 1                         | Processing Method:  | Precision 1_Accuracy_PyridineM |
| Injection Volume: | 100,00 ul                 | Channel Name:       | Extract 275,0                  |
| Run Time:         | 20,0 Minutes              | Proc. Chnl. Descr.: | PDA 275,0 nm, Smoothed by 25   |
| Acquired By:      | Roxana_Roman              |                     |                                |

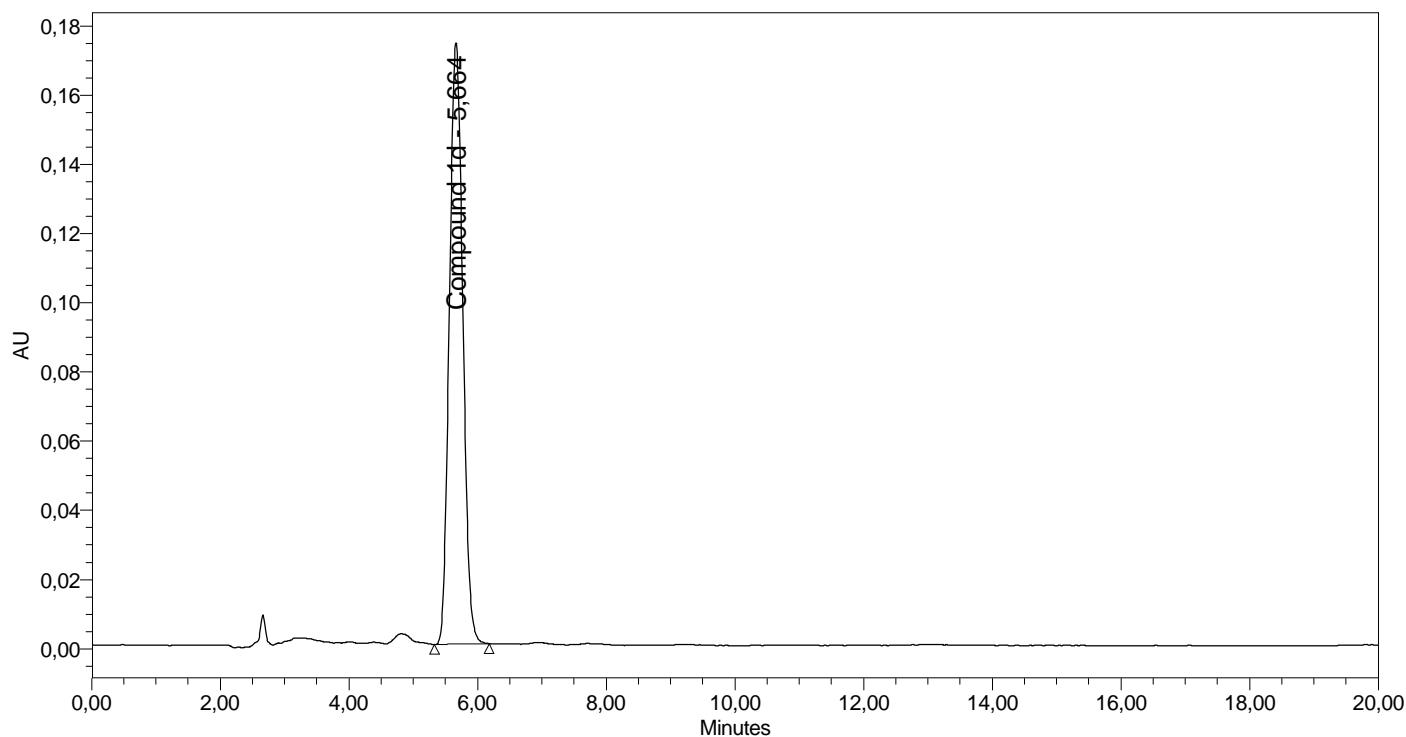

|   | Peak Name   | RT    | Area    | Height (μV) | Purity1 Angle | Purity1 Threshold | Purity1 Flag |
|---|-------------|-------|---------|-------------|---------------|-------------------|--------------|
| 1 | Compound 1d | 5,664 | 2514887 | 173812      | 0,086         | 0,282             | No           |

## Precision 1\_Accuracy\_1d\_Report

Reported by User: Roxana Roman (Roxana\_Roman)  
 Acquisition Server: Waters7  
 Project Name: Test  
 Sample Set Name: Precision 1\_Accuracy\_PyridineM  
 Code column: Inertsil ODS-3, 4,6\*250 mm, 5 um

### SAMPLE INFORMATION

|                   |                           |                     |                                |
|-------------------|---------------------------|---------------------|--------------------------------|
| Sample Name:      | Methyl-pyridine 40 ug/ mL | Date Acquired:      | 12.06.2022 06:15:06            |
| Sample Type:      | Unknown                   | Acq. Method Set:    | Precision 1_Accuracy_PyridineM |
| Vial:             | 38                        | Date Processed:     | 18.02.2023 09:26:31            |
| Injection #:      | 1                         | Processing Method:  | Precision 1_Accuracy_PyridineM |
| Injection Volume: | 100,00 ul                 | Channel Name:       | Extract 275,0                  |
| Run Time:         | 20,0 Minutes              | Proc. Chnl. Descr.: | PDA 275,0 nm, Smoothed by 25   |
| Acquired By:      | Roxana_Roman              |                     |                                |



|   | Peak Name   | RT    | Area    | Height (μV) | Purity1 Angle | Purity1 Threshold | Purity1 Flag |
|---|-------------|-------|---------|-------------|---------------|-------------------|--------------|
| 1 | Compound 1d | 5,639 | 3274981 | 234313      | 0,084         | 0,320             | No           |

## Precision 1\_Accuracy\_1d\_Report

Reported by User: Roxana Roman (Roxana\_Roman)  
 Acquisition Server: Waters7  
 Project Name: Test  
 Sample Set Name: Precision 1\_Accuracy\_PyridineM  
 Code column: Inertsil ODS-3, 4,6\*250 mm, 5 um

### SAMPLE INFORMATION

|                   |                           |                     |                                |
|-------------------|---------------------------|---------------------|--------------------------------|
| Sample Name:      | Methyl-pyridine 40 ug/ mL | Date Acquired:      | 12.06.2022 06:36:09            |
| Sample Type:      | Unknown                   | Acq. Method Set:    | Precision 1_Accuracy_PyridineM |
| Vial:             | 39                        | Date Processed:     | 18.02.2023 09:26:37            |
| Injection #:      | 1                         | Processing Method:  | Precision 1_Accuracy_PyridineM |
| Injection Volume: | 100,00 ul                 | Channel Name:       | Extract 275,0                  |
| Run Time:         | 20,0 Minutes              | Proc. Chnl. Descr.: | PDA 275,0 nm, Smoothed by 25   |
| Acquired By:      | Roxana_Roman              |                     |                                |



|   | Peak Name   | RT    | Area    | Height (μV) | Purity1 Angle | Purity1 Threshold | Purity1 Flag |
|---|-------------|-------|---------|-------------|---------------|-------------------|--------------|
| 1 | Compound 1d | 5,629 | 3276413 | 234016      | 0,173         | 0,288             | No           |

## Precision 1\_Accuracy\_1d\_Report

Reported by User: Roxana Roman (Roxana\_Roman)  
 Acquisition Server: Waters7  
 Project Name: Test  
 Sample Set Name: Precision 1\_Accuracy\_PyridineM  
 Code column: Inertsil ODS-3, 4,6\*250 mm, 5 um

### SAMPLE INFORMATION

|                   |                           |                     |                                |
|-------------------|---------------------------|---------------------|--------------------------------|
| Sample Name:      | Methyl-pyridine 40 ug/ mL | Date Acquired:      | 12.06.2022 06:56:57            |
| Sample Type:      | Unknown                   | Acq. Method Set:    | Precision 1_Accuracy_PyridineM |
| Vial:             | 40                        | Date Processed:     | 16.02.2023 13:14:42            |
| Injection #:      | 1                         | Processing Method:  | Precision 1_Accuracy_PyridineM |
| Injection Volume: | 100,00 ul                 | Channel Name:       | Extract 275,0                  |
| Run Time:         | 20,0 Minutes              | Proc. Chnl. Descr.: | PDA 275,0 nm, Smoothed by 25   |
| Acquired By:      | Roxana_Roman              |                     |                                |

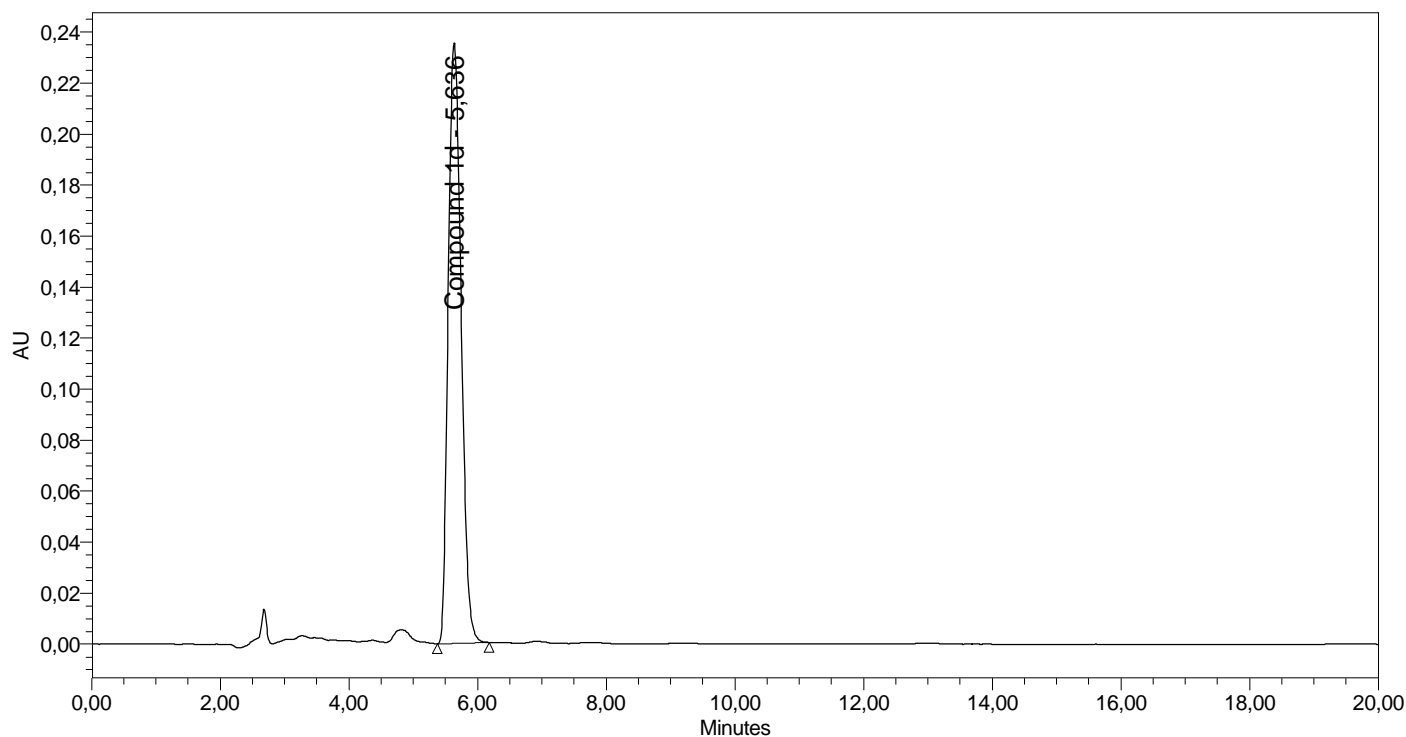

|   | Peak Name   | RT    | Area    | Height (μV) | Purity1 Angle | Purity1 Threshold | Purity1 Flag |
|---|-------------|-------|---------|-------------|---------------|-------------------|--------------|
| 1 | Compound 1d | 5,636 | 3288268 | 235494      | 0,141         | 0,286             | No           |

## Precision 1\_Accuracy\_1d\_Report

Reported by User: Roxana Roman (Roxana\_Roman)  
 Acquisition Server: Waters7  
 Project Name: Test  
 Sample Set Name: Precision 1\_Accuracy\_PyridineM  
 Code column: Inertsil ODS-3, 4,6\*250 mm, 5 um

### SAMPLE INFORMATION

|                   |                           |                     |                                |
|-------------------|---------------------------|---------------------|--------------------------------|
| Sample Name:      | Methyl-pyridine 40 ug/ mL | Date Acquired:      | 12.06.2022 07:17:44            |
| Sample Type:      | Unknown                   | Acq. Method Set:    | Precision 1_Accuracy_PyridineM |
| Vial:             | 41                        | Date Processed:     | 16.02.2023 13:15:04            |
| Injection #:      | 1                         | Processing Method:  | Precision 1_Accuracy_PyridineM |
| Injection Volume: | 100,00 ul                 | Channel Name:       | Extract 275,0                  |
| Run Time:         | 20,0 Minutes              | Proc. Chnl. Descr.: | PDA 275,0 nm, Smoothed by 25   |
| Acquired By:      | Roxana_Roman              |                     |                                |

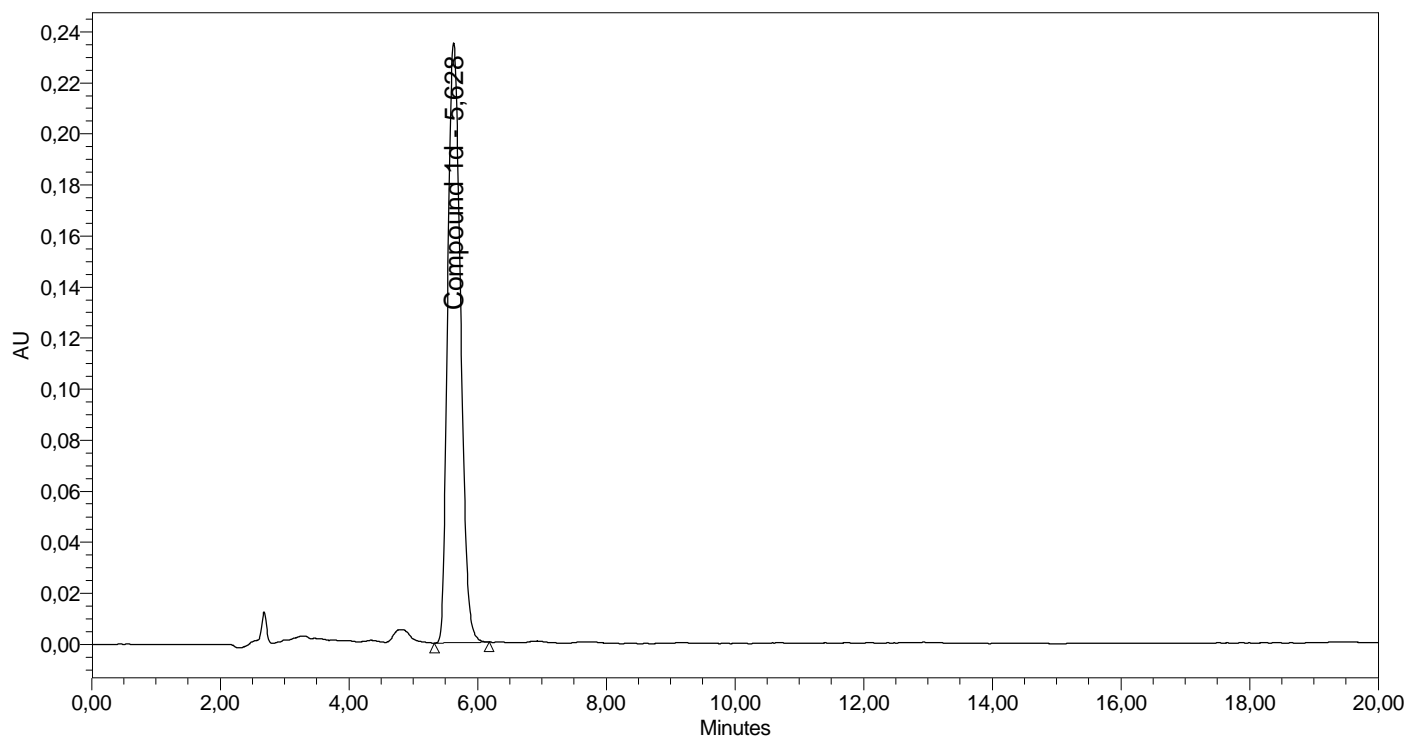

|   | Peak Name   | RT    | Area    | Height (μV) | Purity1 Angle | Purity1 Threshold | Purity1 Flag |
|---|-------------|-------|---------|-------------|---------------|-------------------|--------------|
| 1 | Compound 1d | 5,628 | 3281385 | 235056      | 0,162         | 0,288             | No           |

## Precision 1\_Accuracy\_1d\_Report

Reported by User: Roxana Roman (Roxana\_Roman)  
 Acquisition Server: Waters7  
 Project Name: Test  
 Sample Set Name: Precision 1\_Accuracy\_PyridineM  
 Code column: Inertsil ODS-3, 4,6\*250 mm, 5 um

### SAMPLE INFORMATION

|                   |                           |                     |                                |
|-------------------|---------------------------|---------------------|--------------------------------|
| Sample Name:      | Methyl-pyridine 40 ug/ mL | Date Acquired:      | 12.06.2022 07:38:32            |
| Sample Type:      | Unknown                   | Acq. Method Set:    | Precision 1_Accuracy_PyridineM |
| Vial:             | 42                        | Date Processed:     | 18.02.2023 09:27:02            |
| Injection #:      | 1                         | Processing Method:  | Precision 1_Accuracy_PyridineM |
| Injection Volume: | 100,00 ul                 | Channel Name:       | Extract 275,0                  |
| Run Time:         | 20,0 Minutes              | Proc. Chnl. Descr.: | PDA 275,0 nm, Smoothed by 25   |
| Acquired By:      | Roxana_Roman              |                     |                                |

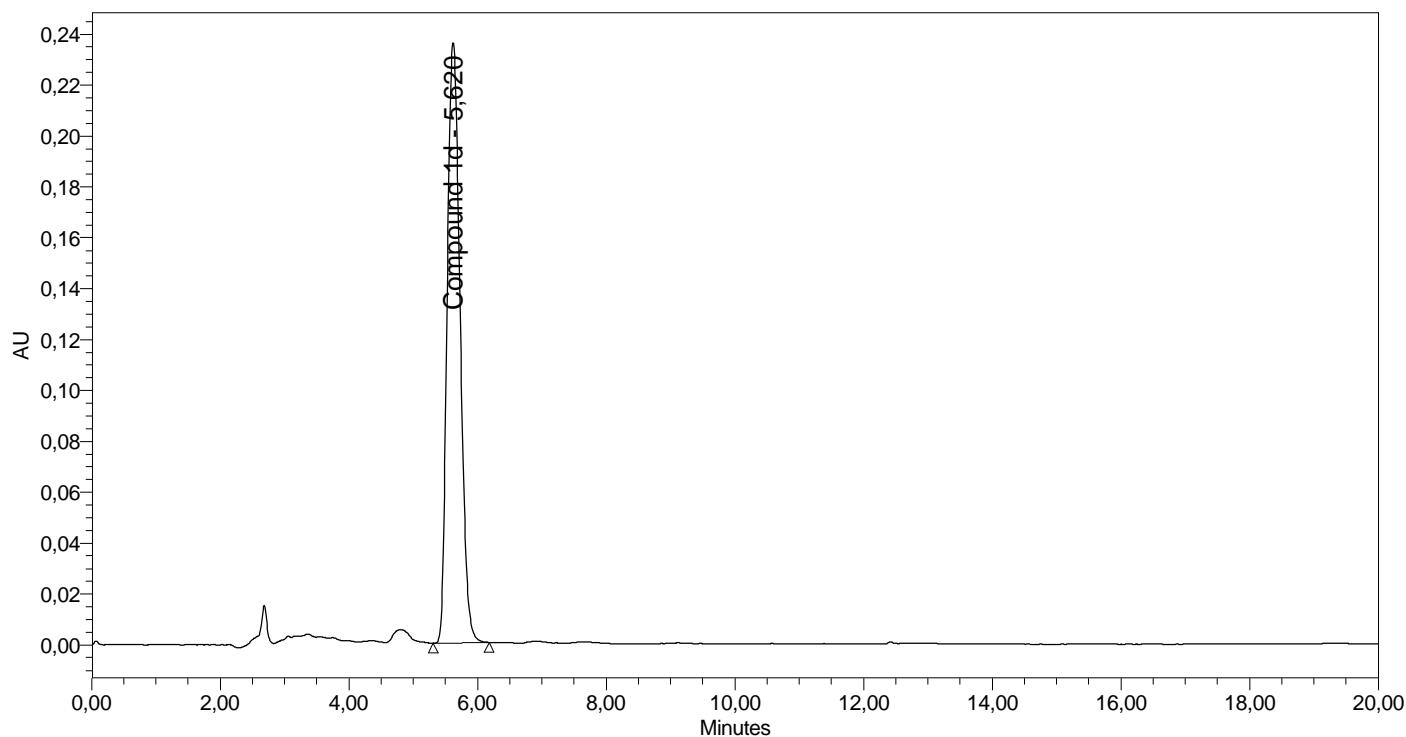

|   | Peak Name   | RT    | Area    | Height (μV) | Purity1 Angle | Purity1 Threshold | Purity1 Flag |
|---|-------------|-------|---------|-------------|---------------|-------------------|--------------|
| 1 | Compound 1d | 5,620 | 3287538 | 235920      | 0,186         | 0,287             | No           |

## Precision 1\_Accuracy\_1d\_Report

Reported by User: Roxana Roman (Roxana\_Roman)  
 Acquisition Server: Waters7  
 Project Name: Test  
 Sample Set Name: Precision 1\_Accuracy\_PyridineM  
 Code column: Inertsil ODS-3, 4,6\*250 mm, 5 um

### SAMPLE INFORMATION

|                   |                           |                     |                                |
|-------------------|---------------------------|---------------------|--------------------------------|
| Sample Name:      | Methyl-pyridine 40 ug/ mL | Date Acquired:      | 12.06.2022 07:59:20            |
| Sample Type:      | Unknown                   | Acq. Method Set:    | Precision 1_Accuracy_PyridineM |
| Vial:             | 43                        | Date Processed:     | 18.02.2023 09:27:09            |
| Injection #:      | 1                         | Processing Method:  | Precision 1_Accuracy_PyridineM |
| Injection Volume: | 100,00 ul                 | Channel Name:       | Extract 275,0                  |
| Run Time:         | 20,0 Minutes              | Proc. Chnl. Descr.: | PDA 275,0 nm, Smoothed by 25   |
| Acquired By:      | Roxana_Roman              |                     |                                |

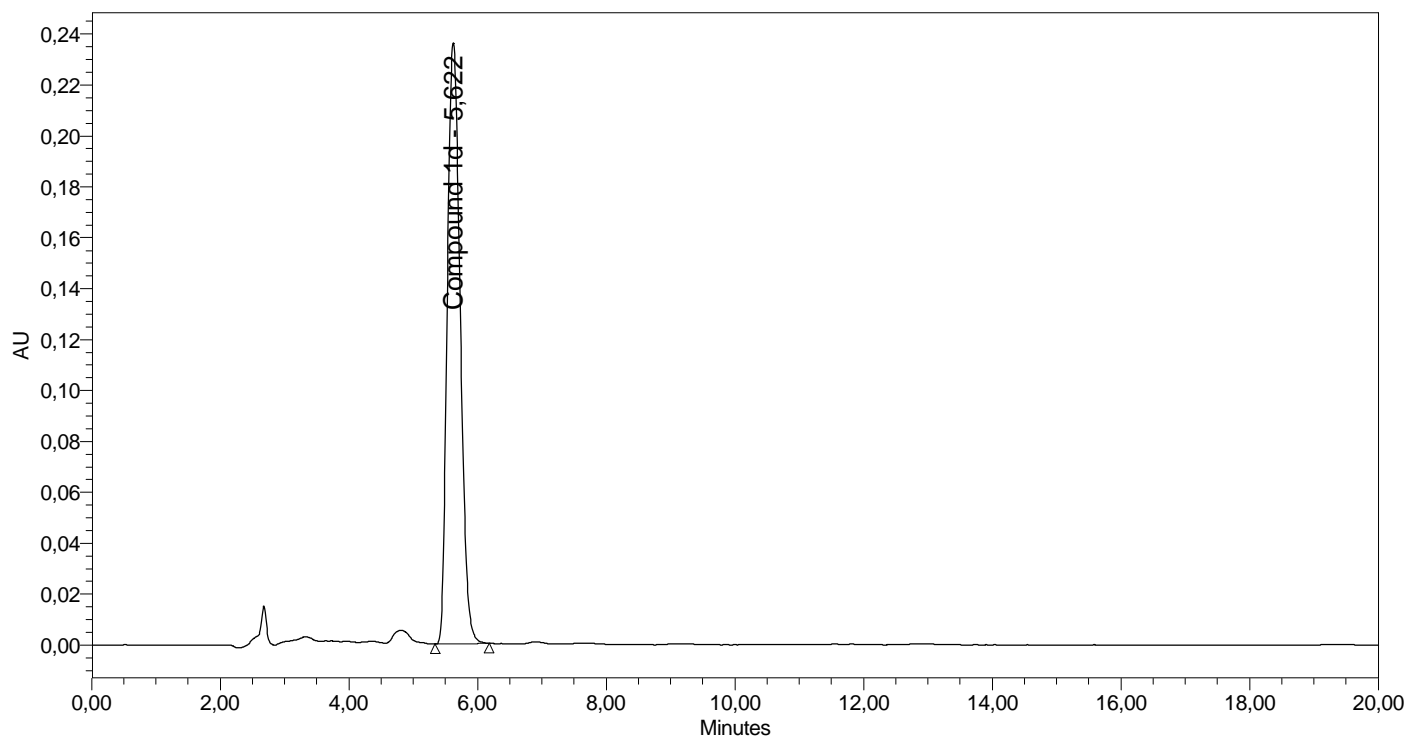

|   | Peak Name   | RT    | Area    | Height (μV) | Purity1 Angle | Purity1 Threshold | Purity1 Flag |
|---|-------------|-------|---------|-------------|---------------|-------------------|--------------|
| 1 | Compound 1d | 5,622 | 3288522 | 236135      | 0,161         | 0,287             | No           |

**Quantitative determination of**  
***compound 1d***

**- Validation of the analytical method -**

Validation parameters:

- Specificity
- Precision 1
- **Precision 2**
- LOD – LOQ
- Linearity
- Range
- **Accuracy**



## Precision 2\_1d\_Report

Reported by User: Roxana Roman (Roxana\_Roman)  
 Acquisition Server: Waters7  
 Project Name: Test  
 Sample Set Name: Precision 2\_PyridineM  
 Code column: Inertsil ODS-3, 4,6\*250 mm, 5 um

### SAMPLE INFORMATION

|                   |                           |                     |                              |
|-------------------|---------------------------|---------------------|------------------------------|
| Sample Name:      | Methyl-pyridine 30 ug/ mL | Date Acquired:      | 15.06.2022 13:04:35          |
| Sample Type:      | Standard                  | Acq. Method Set:    | Precision 2_PyridineM        |
| Vial:             | 25                        | Date Processed:     | 18.02.2023 09:43:00          |
| Injection #:      | 1                         | Processing Method:  | Precision 2_PyridineM        |
| Injection Volume: | 100,00 ul                 | Channel Name:       | Extract 275,0                |
| Run Time:         | 20,0 Minutes              | Proc. Chnl. Descr.: | PDA 275,0 nm, Smoothed by 25 |
| Acquired By:      | Roxana_Roman              |                     |                              |

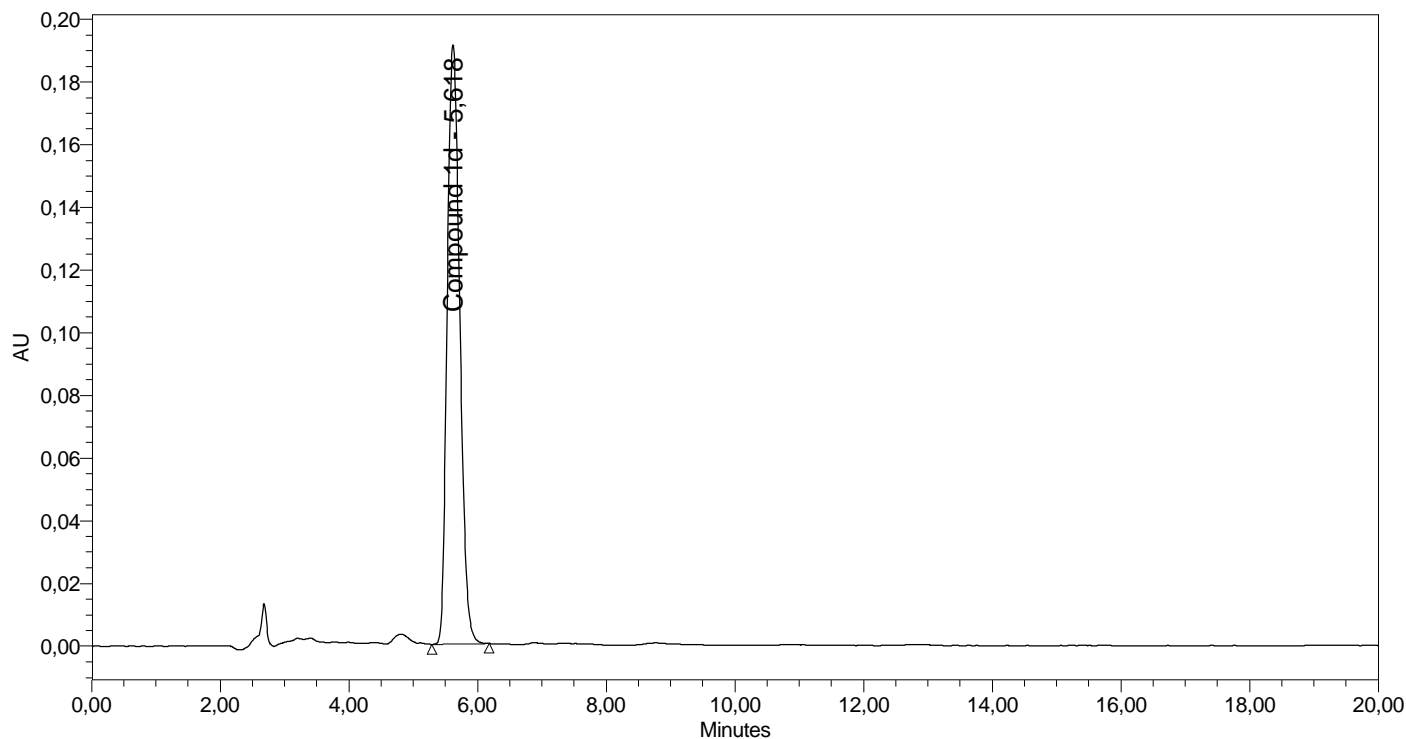

|   | Peak Name   | RT    | Area    | Height (μV) | Purity1 Angle | Purity1 Threshold | Purity1 Flag |
|---|-------------|-------|---------|-------------|---------------|-------------------|--------------|
| 1 | Compound 1d | 5,618 | 2598931 | 191148      | 0,282         | 0,313             | No           |

## Precision 2\_1d\_Report

Reported by User: Roxana Roman (Roxana\_Roman)  
 Acquisition Server: Waters7  
 Project Name: Test  
 Sample Set Name: Precision 2\_PyridineM  
 Code column: Inertsil ODS-3, 4,6\*250 mm, 5 um

### SAMPLE INFORMATION

|                   |                           |                     |                              |
|-------------------|---------------------------|---------------------|------------------------------|
| Sample Name:      | Methyl-pyridine 30 ug/ mL | Date Acquired:      | 15.06.2022 13:25:19          |
| Sample Type:      | Standard                  | Acq. Method Set:    | Precision 2_PyridineM        |
| Vial:             | 25                        | Date Processed:     | 18.02.2023 09:43:08          |
| Injection #:      | 2                         | Processing Method:  | Precision 2_PyridineM        |
| Injection Volume: | 100,00 ul                 | Channel Name:       | Extract 275,0                |
| Run Time:         | 20,0 Minutes              | Proc. Chnl. Descr.: | PDA 275,0 nm, Smoothed by 25 |
| Acquired By:      | Roxana_Roman              |                     |                              |

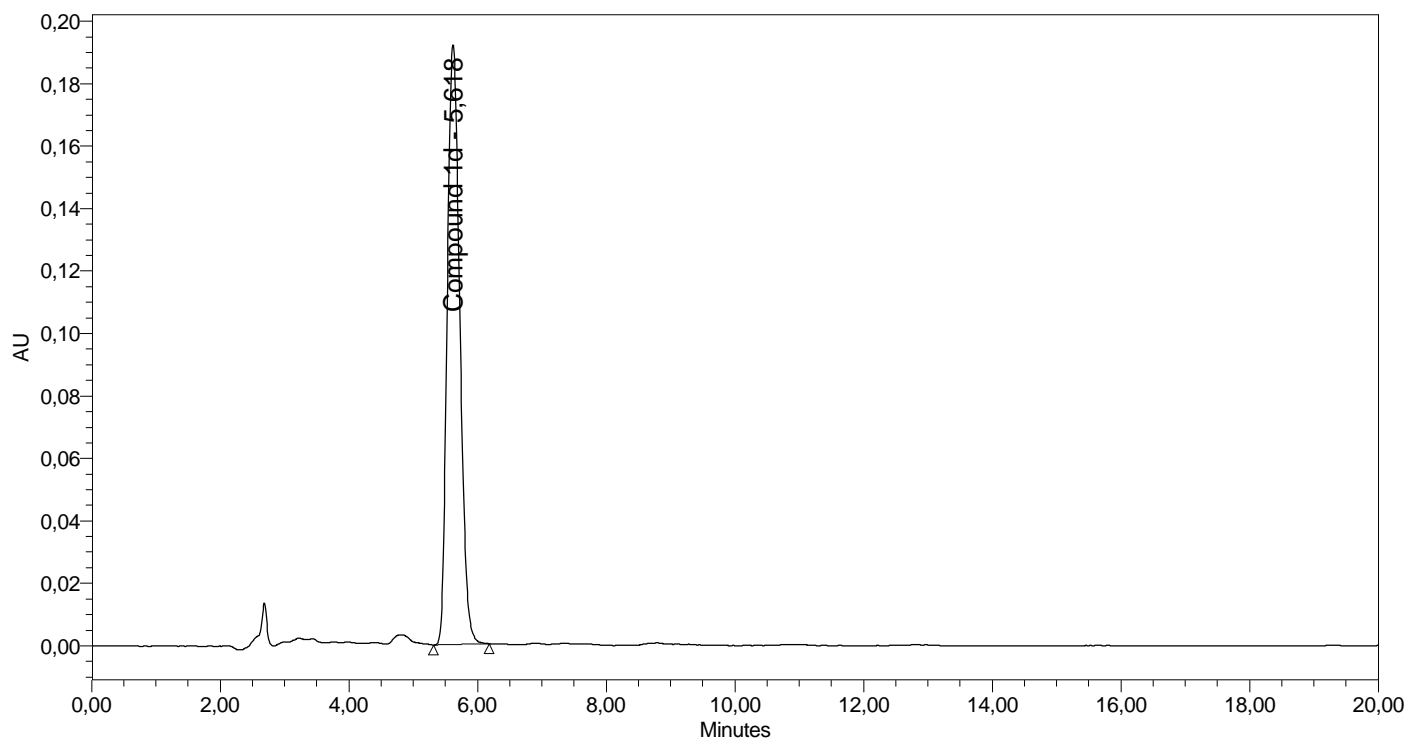

|   | Peak Name   | RT    | Area    | Height (μV) | Purity1 Angle | Purity1 Threshold | Purity1 Flag |
|---|-------------|-------|---------|-------------|---------------|-------------------|--------------|
| 1 | Compound 1d | 5,618 | 2607971 | 192018      | 0,235         | 0,288             | No           |

## Precision 2\_1d\_Report

Reported by User: Roxana Roman (Roxana\_Roman)  
 Acquisition Server: Waters7  
 Project Name: Test  
 Sample Set Name: Precision 2\_PyridineM  
 Code column: Inertsil ODS-3, 4,6\*250 mm, 5 um

### SAMPLE INFORMATION

|                   |                           |                     |                              |
|-------------------|---------------------------|---------------------|------------------------------|
| Sample Name:      | Methyl-pyridine 30 ug/ mL | Date Acquired:      | 15.06.2022 13:46:02          |
| Sample Type:      | Standard                  | Acq. Method Set:    | Precision 2_PyridineM        |
| Vial:             | 25                        | Date Processed:     | 18.02.2023 09:43:08          |
| Injection #:      | 3                         | Processing Method:  | Precision 2_PyridineM        |
| Injection Volume: | 100,00 ul                 | Channel Name:       | Extract 275,0                |
| Run Time:         | 20,0 Minutes              | Proc. Chnl. Descr.: | PDA 275,0 nm, Smoothed by 25 |
| Acquired By:      | Roxana_Roman              |                     |                              |

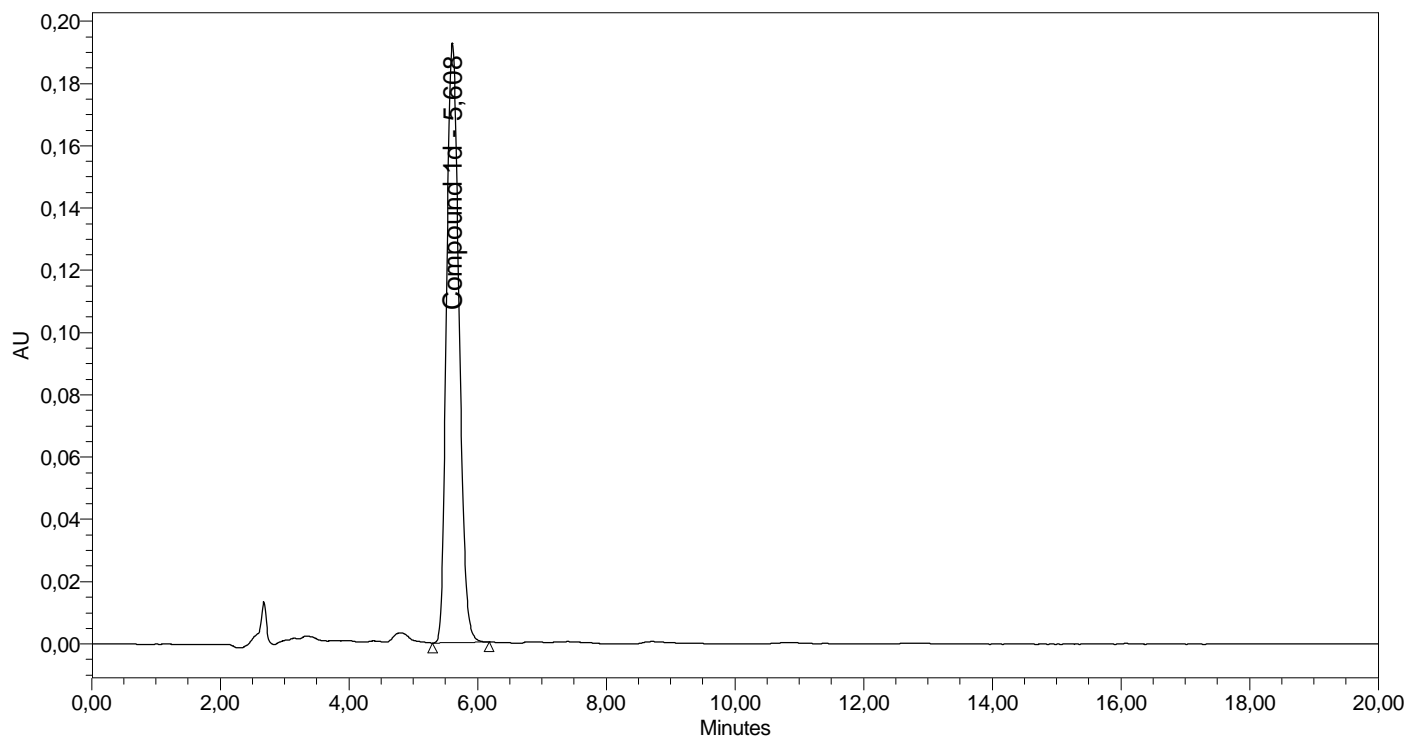

|   | Peak Name   | RT    | Area    | Height (μV) | Purity1 Angle | Purity1 Threshold | Purity1 Flag |
|---|-------------|-------|---------|-------------|---------------|-------------------|--------------|
| 1 | Compound 1d | 5,608 | 2616204 | 192615      | 0,233         | 0,285             | No           |

## Component Summary Area Time

Reported by User: Roxana Roman (Roxana\_Roman)  
Acquisition Server: Waters7  
Project Name: Test  
Sample Set Name: Precision 2\_PyridineM  
Code column: Inertsil ODS-3, 4,6\*250 mm, 5 um

### Component Summary For Retention Time Channel: W2996

|           | SampleName                | Inj | Channel | Vial | Compound 1d |
|-----------|---------------------------|-----|---------|------|-------------|
| 1         | Methyl-pyridine 30 ug/ mL | 1   | W2996   | 25   | 5,618       |
| 2         | Methyl-pyridine 30 ug/ mL | 2   | W2996   | 25   | 5,618       |
| 3         | Methyl-pyridine 30 ug/ mL | 3   | W2996   | 25   | 5,608       |
| Mean      |                           |     |         |      | 5,615       |
| Std. Dev. |                           |     |         |      | 0,006       |
| % RSD     |                           |     |         |      | 0,11        |

### Component Summary For Area Channel: W2996

|           | SampleName                | Inj | Channel | Vial | Compound 1d |
|-----------|---------------------------|-----|---------|------|-------------|
| 1         | Methyl-pyridine 30 ug/ mL | 1   | W2996   | 25   | 2598931     |
| 2         | Methyl-pyridine 30 ug/ mL | 2   | W2996   | 25   | 2607971     |
| 3         | Methyl-pyridine 30 ug/ mL | 3   | W2996   | 25   | 2616204     |
| Mean      |                           |     |         |      | 2607702     |
| Std. Dev. |                           |     |         |      | 8640        |
| % RSD     |                           |     |         |      | 0,33        |

## Precision 2\_1d\_Report

Reported by User: Roxana Roman (Roxana\_Roman)  
 Acquisition Server: Waters7  
 Project Name: Test  
 Sample Set Name: Precision 2\_PyridineM  
 Code column: Inertsil ODS-3, 4,6\*250 mm, 5 um

### SAMPLE INFORMATION

|                   |              |                     |                              |
|-------------------|--------------|---------------------|------------------------------|
| Sample Name:      | Methanol     | Date Acquired:      | 15.06.2022 12:43:32          |
| Sample Type:      | Standard     | Acq. Method Set:    | Precision 2_PyridineM        |
| Vial:             | 11           | Date Processed:     | 18.02.2023 09:42:52          |
| Injection #:      | 1            | Processing Method:  | Precision 2_PyridineM        |
| Injection Volume: | 100,00 ul    | Channel Name:       | Extract 275,0                |
| Run Time:         | 20,0 Minutes | Proc. Chnl. Descr.: | PDA 275,0 nm, Smoothed by 25 |
| Acquired By:      | Roxana_Roman |                     |                              |

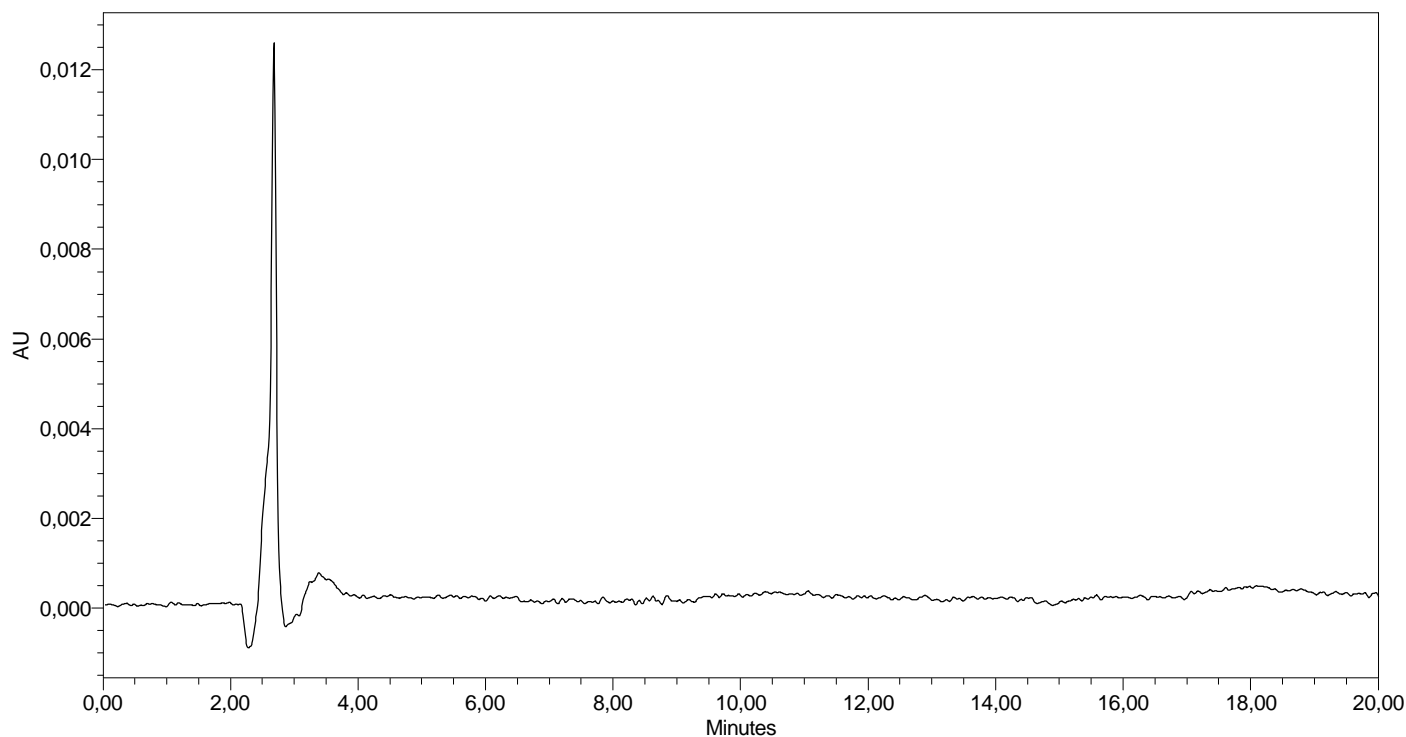

Basic LC Peaks Table group contains no data.

## Precision 2\_1d\_Report

Reported by User: Roxana Roman (Roxana\_Roman)  
 Acquisition Server: Waters7  
 Project Name: Test  
 Sample Set Name: Precision 2\_PyridineM  
 Code column: Inertsil ODS-3, 4,6\*250 mm, 5 um

### SAMPLE INFORMATION

|                   |                           |                     |                              |
|-------------------|---------------------------|---------------------|------------------------------|
| Sample Name:      | Methyl-pyridine 20 ug/ mL | Date Acquired:      | 15.06.2022 15:56:17          |
| Sample Type:      | Unknown                   | Acq. Method Set:    | Precision 2_PyridineM        |
| Vial:             | 26                        | Date Processed:     | 18.02.2023 09:44:24          |
| Injection #:      | 1                         | Processing Method:  | Precision 2_PyridineM        |
| Injection Volume: | 100,00 ul                 | Channel Name:       | Extract 275,0                |
| Run Time:         | 20,0 Minutes              | Proc. Chnl. Descr.: | PDA 275,0 nm, Smoothed by 25 |
| Acquired By:      | Roxana_Roman              |                     |                              |

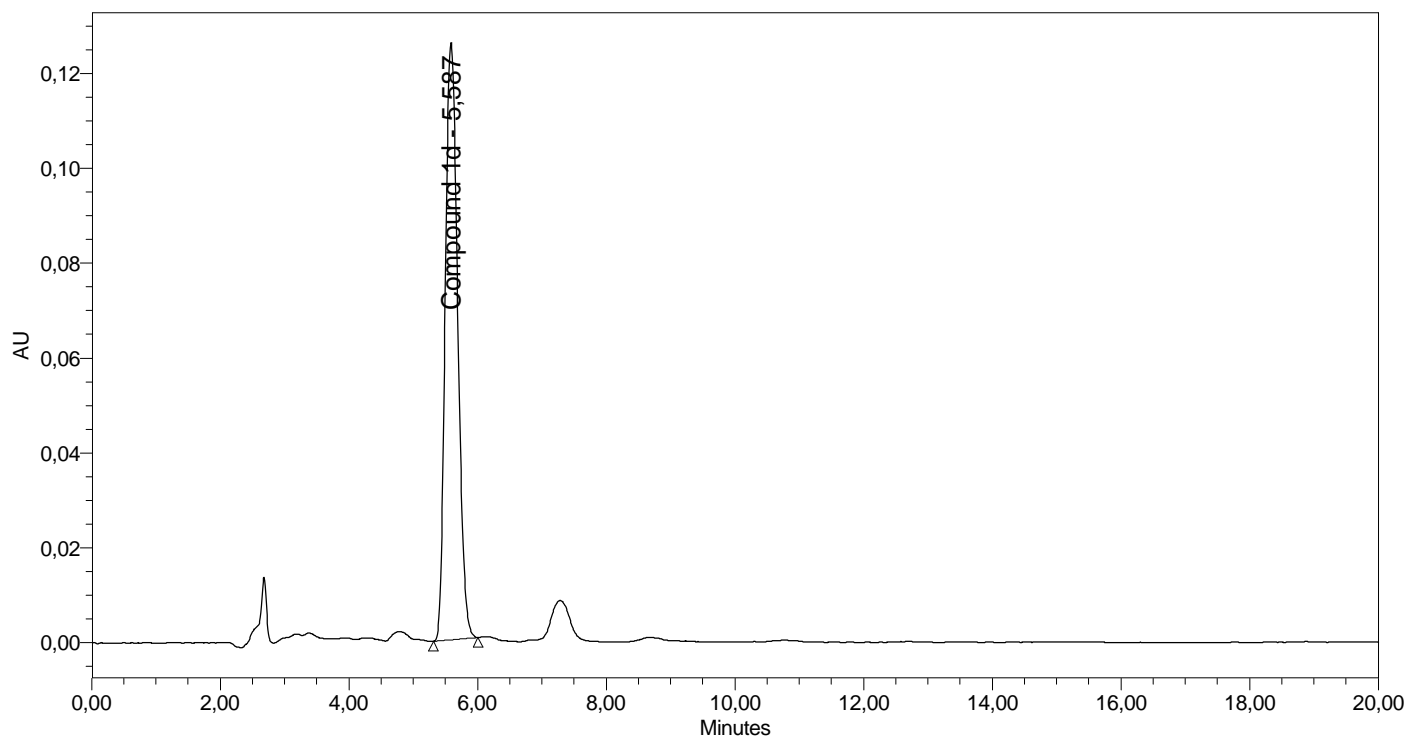

|   | Peak Name   | RT    | Area    | Height (μV) | Purity1 Angle | Purity1 Threshold | Purity1 Flag |
|---|-------------|-------|---------|-------------|---------------|-------------------|--------------|
| 1 | Compound 1d | 5,587 | 1691833 | 125886      | 0,277         | 0,314             | No           |

## Precision 2\_1d\_Report

Reported by User: Roxana Roman (Roxana\_Roman)  
 Acquisition Server: Waters7  
 Project Name: Test  
 Sample Set Name: Precision 2\_PyridineM  
 Code column: Inertsil ODS-3, 4,6\*250 mm, 5 um

### SAMPLE INFORMATION

|                   |                           |                     |                              |
|-------------------|---------------------------|---------------------|------------------------------|
| Sample Name:      | Methyl-pyridine 20 ug/ mL | Date Acquired:      | 15.06.2022 14:52:49          |
| Sample Type:      | Unknown                   | Acq. Method Set:    | Precision 2_PyridineM        |
| Vial:             | 27                        | Date Processed:     | 18.02.2023 09:45:21          |
| Injection #:      | 1                         | Processing Method:  | Precision 2_PyridineM        |
| Injection Volume: | 100,00 ul                 | Channel Name:       | Extract 275,0                |
| Run Time:         | 20,0 Minutes              | Proc. Chnl. Descr.: | PDA 275,0 nm, Smoothed by 25 |
| Acquired By:      | Roxana_Roman              |                     |                              |

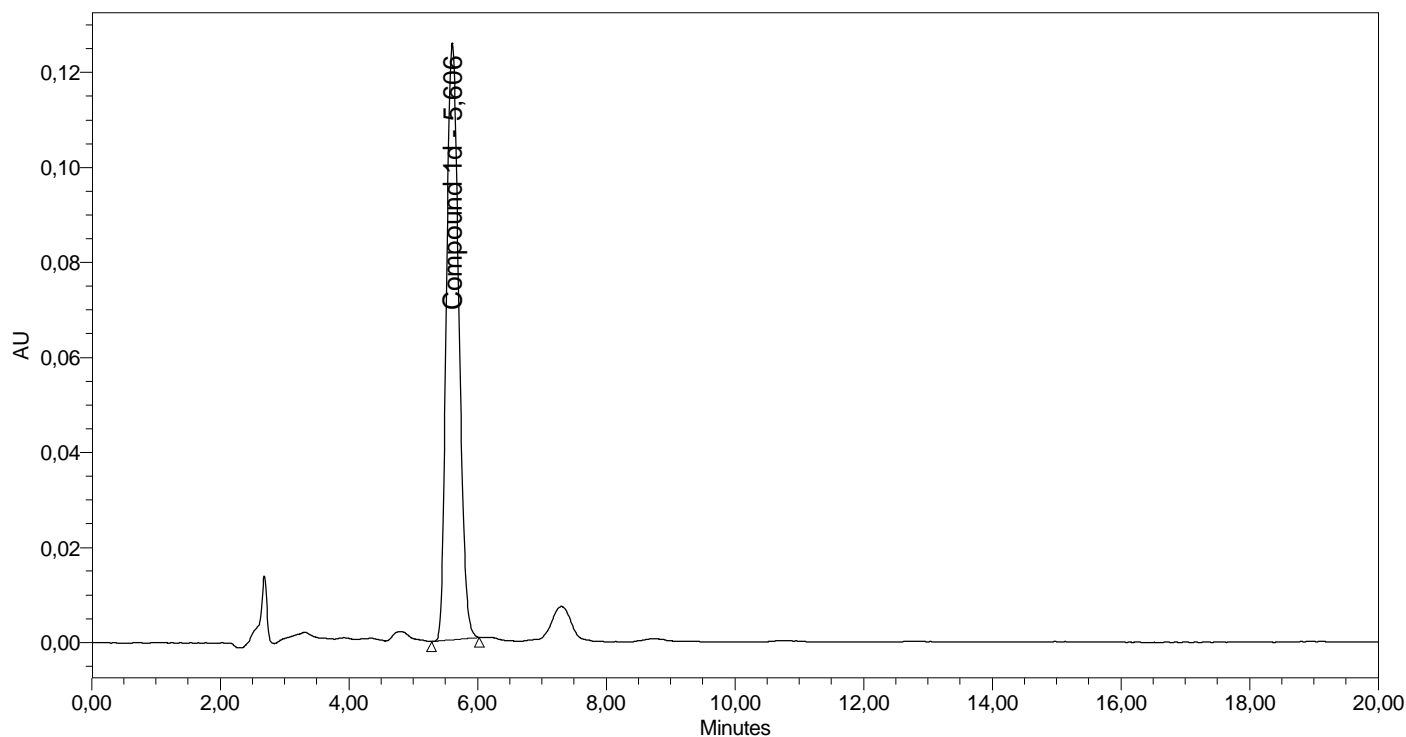

|   | Peak Name   | RT    | Area    | Height (μV) | Purity1 Angle | Purity1 Threshold | Purity1 Flag |
|---|-------------|-------|---------|-------------|---------------|-------------------|--------------|
| 1 | Compound 1d | 5,606 | 1690608 | 125674      | 0,268         | 0,286             | No           |

## Precision 2\_1d\_Report

Reported by User: Roxana Roman (Roxana\_Roman)  
 Acquisition Server: Waters7  
 Project Name: Test  
 Sample Set Name: Precision 2\_PyridineM  
 Code column: Inertsil ODS-3, 4,6\*250 mm, 5 um

### SAMPLE INFORMATION

|                   |                           |                     |                              |
|-------------------|---------------------------|---------------------|------------------------------|
| Sample Name:      | Methyl-pyridine 20 ug/ mL | Date Acquired:      | 15.06.2022 15:13:37          |
| Sample Type:      | Unknown                   | Acq. Method Set:    | Precision 2_PyridineM        |
| Vial:             | 28                        | Date Processed:     | 18.02.2023 09:49:25          |
| Injection #:      | 1                         | Processing Method:  | Precision 2_PyridineM        |
| Injection Volume: | 100,00 ul                 | Channel Name:       | Extract 275,0                |
| Run Time:         | 20,0 Minutes              | Proc. Chnl. Descr.: | PDA 275,0 nm, Smoothed by 25 |
| Acquired By:      | Roxana_Roman              |                     |                              |

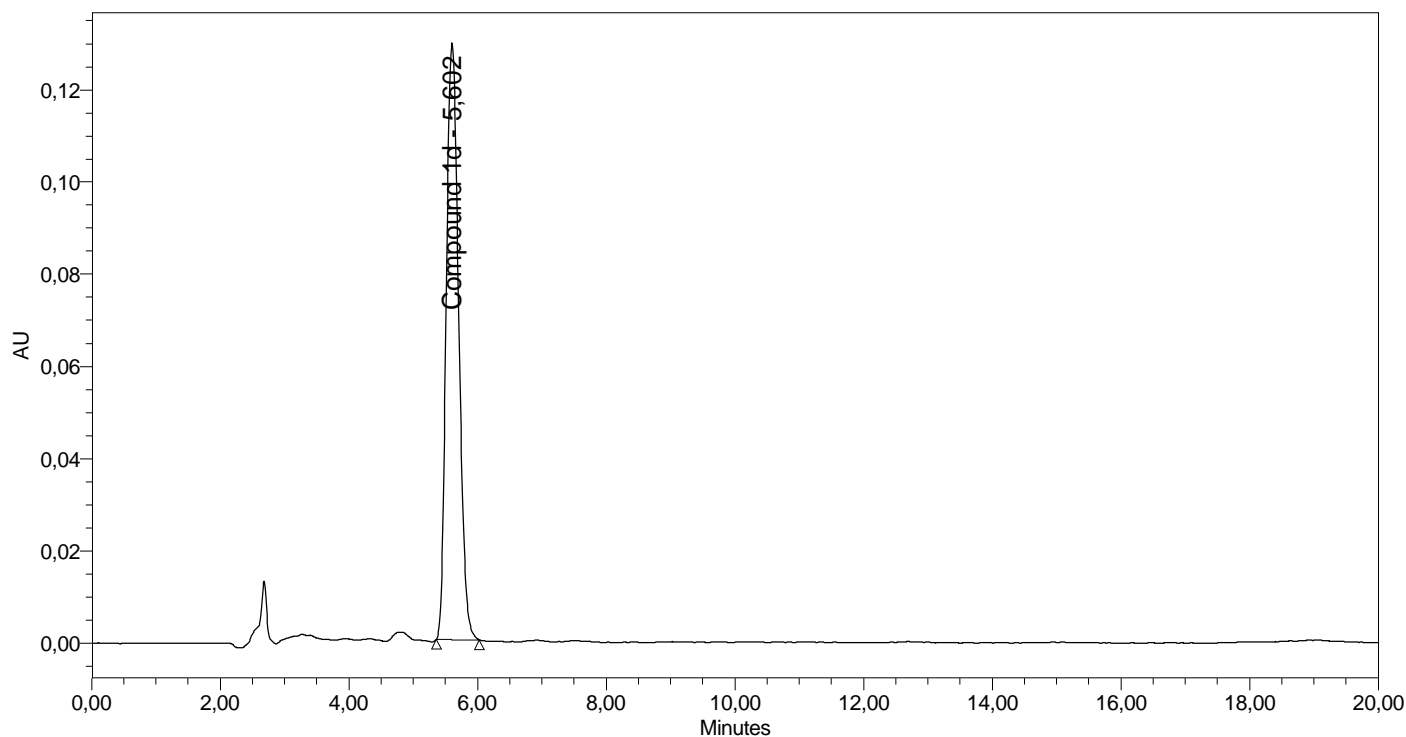

|   | Peak Name   | RT    | Area    | Height (μV) | Purity1 Angle | Purity1 Threshold | Purity1 Flag |
|---|-------------|-------|---------|-------------|---------------|-------------------|--------------|
| 1 | Compound 1d | 5,602 | 1736221 | 129434      | 0,222         | 0,285             | No           |



## Precision 2\_1d\_Report

Reported by User: Roxana Roman (Roxana\_Roman)  
 Acquisition Server: Waters7  
 Project Name: Test  
 Sample Set Name: Precision 2\_PyridineM  
 Code column: Inertsil ODS-3, 4,6\*250 mm, 5 um

### SAMPLE INFORMATION

|                   |                           |                     |                              |
|-------------------|---------------------------|---------------------|------------------------------|
| Sample Name:      | Methyl-pyridine 20 ug/ mL | Date Acquired:      | 15.06.2022 15:34:26          |
| Sample Type:      | Unknown                   | Acq. Method Set:    | Precision 2_PyridineM        |
| Vial:             | 29                        | Date Processed:     | 18.02.2023 09:45:51          |
| Injection #:      | 1                         | Processing Method:  | Precision 2_PyridineM        |
| Injection Volume: | 100,00 ul                 | Channel Name:       | Extract 275,0                |
| Run Time:         | 20,0 Minutes              | Proc. Chnl. Descr.: | PDA 275,0 nm, Smoothed by 25 |
| Acquired By:      | Roxana_Roman              |                     |                              |

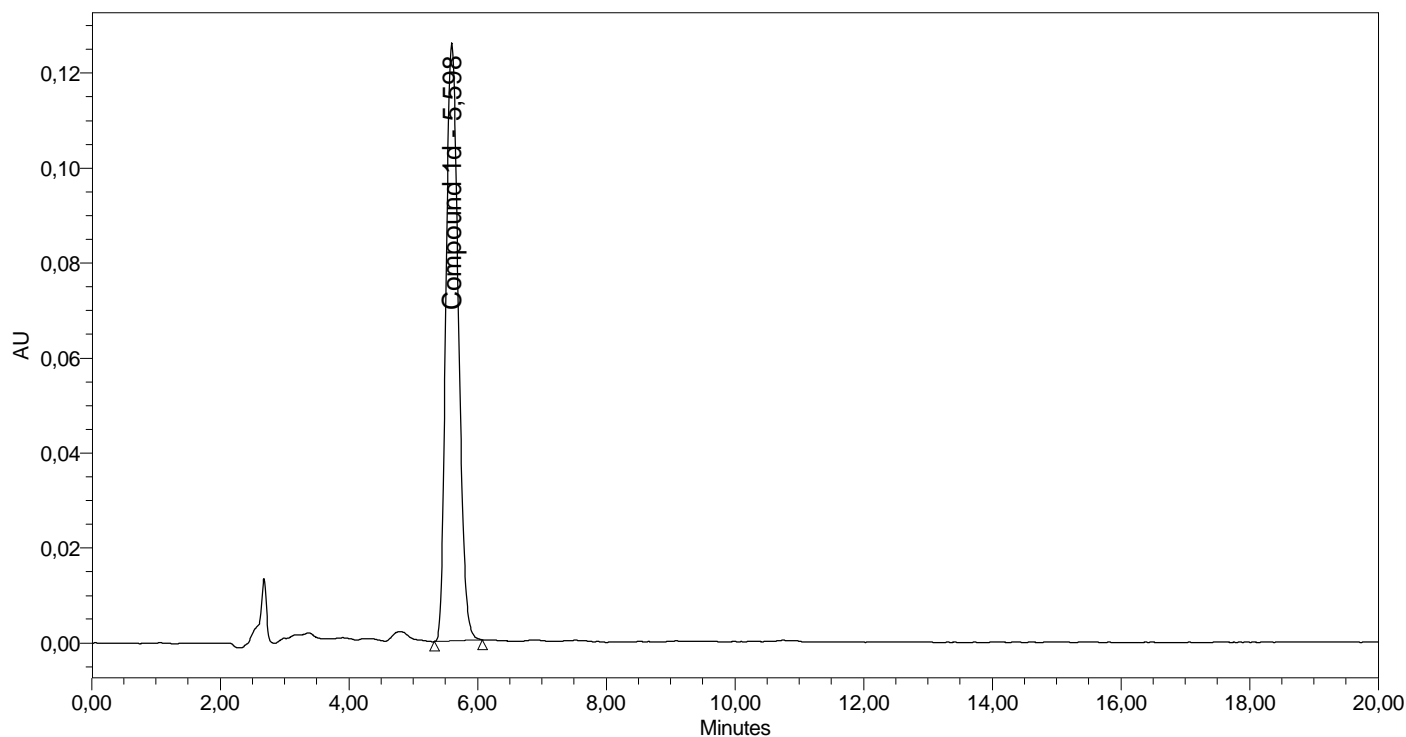

|   | Peak Name   | RT    | Area    | Height (μV) | Purity1 Angle | Purity1 Threshold | Purity1 Flag |
|---|-------------|-------|---------|-------------|---------------|-------------------|--------------|
| 1 | Compound 1d | 5,598 | 1697748 | 125914      | 0,285         | 0,286             | No           |

## Precision 2\_1d\_Report

Reported by User: Roxana Roman (Roxana\_Roman)  
 Acquisition Server: Waters7  
 Project Name: Test  
 Sample Set Name: Precision 2\_PyridineM  
 Code column: Inertsil ODS-3, 4,6\*250 mm, 5 um

### SAMPLE INFORMATION

|                   |                           |                     |                              |
|-------------------|---------------------------|---------------------|------------------------------|
| Sample Name:      | Methyl-pyridine 20 ug/ mL | Date Acquired:      | 15.06.2022 16:17:06          |
| Sample Type:      | Unknown                   | Acq. Method Set:    | Precision 2_PyridineM        |
| Vial:             | 30                        | Date Processed:     | 18.02.2023 09:46:52          |
| Injection #:      | 1                         | Processing Method:  | Precision 2_PyridineM        |
| Injection Volume: | 100,00 ul                 | Channel Name:       | Extract 275,0                |
| Run Time:         | 20,0 Minutes              | Proc. Chnl. Descr.: | PDA 275,0 nm, Smoothed by 25 |
| Acquired By:      | Roxana_Roman              |                     |                              |

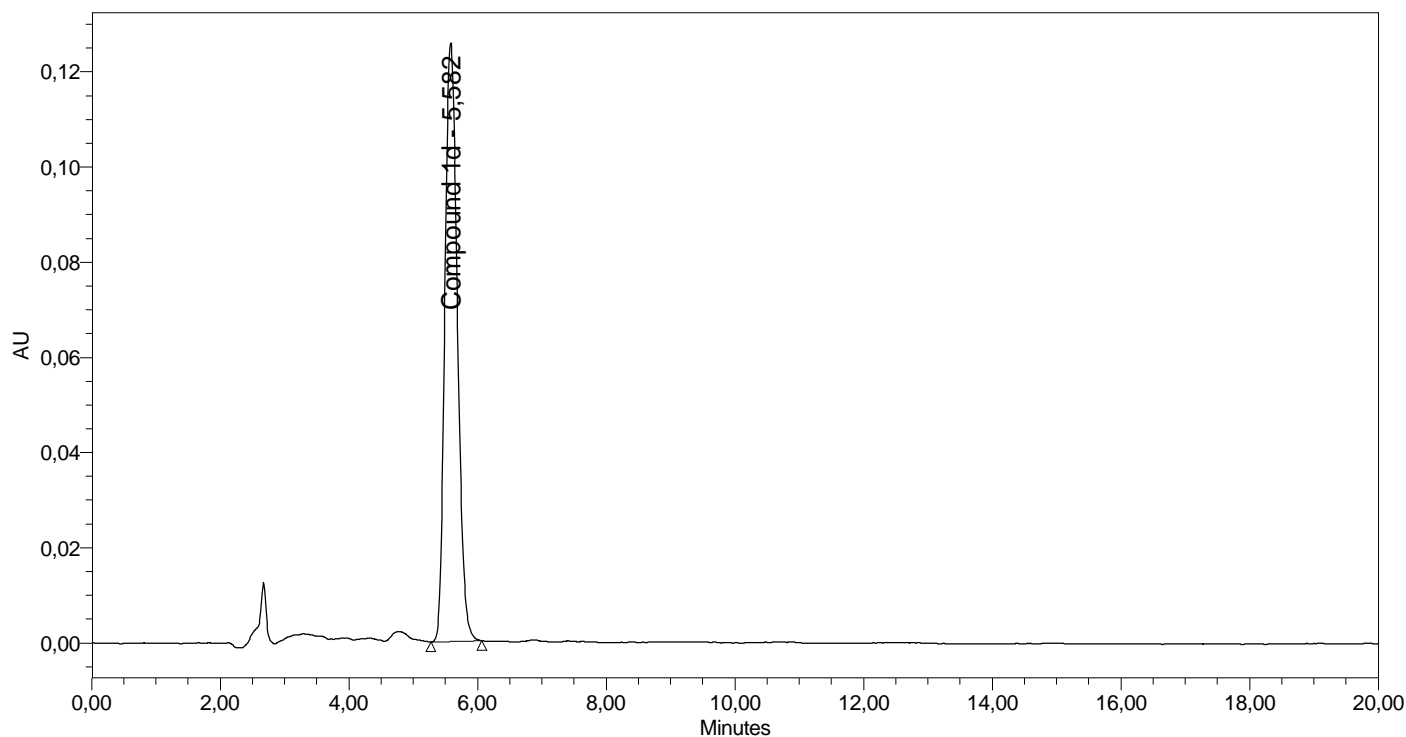

|   | Peak Name   | RT    | Area    | Height (μV) | Purity1 Angle | Purity1 Threshold | Purity1 Flag |
|---|-------------|-------|---------|-------------|---------------|-------------------|--------------|
| 1 | Compound 1d | 5,582 | 1704577 | 125772      | 0,281         | 0,288             | No           |

## Precision 2\_1d\_Report

Reported by User: Roxana Roman (Roxana\_Roman)  
 Acquisition Server: Waters7  
 Project Name: Test  
 Sample Set Name: Precision 2\_PyridineM  
 Code column: Inertsil ODS-3, 4,6\*250 mm, 5 um

### SAMPLE INFORMATION

|                   |                           |                     |                              |
|-------------------|---------------------------|---------------------|------------------------------|
| Sample Name:      | Methyl-pyridine 20 ug/ mL | Date Acquired:      | 15.06.2022 16:37:53          |
| Sample Type:      | Unknown                   | Acq. Method Set:    | Precision 2_PyridineM        |
| Vial:             | 31                        | Date Processed:     | 18.02.2023 09:47:53          |
| Injection #:      | 1                         | Processing Method:  | Precision 2_PyridineM        |
| Injection Volume: | 100,00 ul                 | Channel Name:       | Extract 275,0                |
| Run Time:         | 20,0 Minutes              | Proc. Chnl. Descr.: | PDA 275,0 nm, Smoothed by 25 |
| Acquired By:      | Roxana_Roman              |                     |                              |

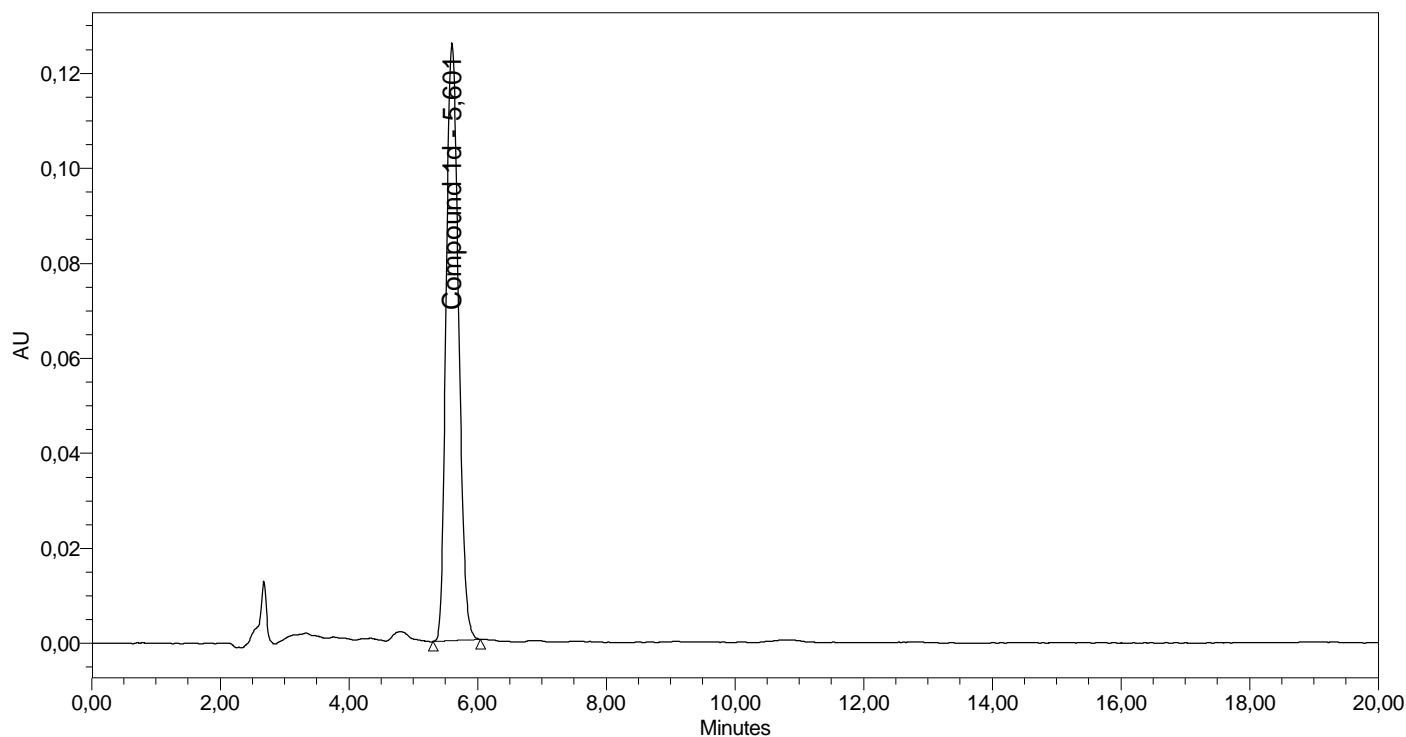

|   | Peak Name   | RT    | Area    | Height (μV) | Purity1 Angle | Purity1 Threshold | Purity1 Flag |
|---|-------------|-------|---------|-------------|---------------|-------------------|--------------|
| 1 | Compound 1d | 5,601 | 1697552 | 125813      | 0,280         | 0,281             | No           |

## Precision 2\_1d\_Report

Reported by User: Roxana Roman (Roxana\_Roman)  
 Acquisition Server: Waters7  
 Project Name: Test  
 Sample Set Name: Precision 2\_PyridineM  
 Code column: Inertsil ODS-3, 4,6\*250 mm, 5 um

### SAMPLE INFORMATION

|                   |                           |                     |                              |
|-------------------|---------------------------|---------------------|------------------------------|
| Sample Name:      | Methyl-pyridine 30 ug/ mL | Date Acquired:      | 15.06.2022 16:58:41          |
| Sample Type:      | Unknown                   | Acq. Method Set:    | Precision 2_PyridineM        |
| Vial:             | 32                        | Date Processed:     | 18.02.2023 09:49:27          |
| Injection #:      | 1                         | Processing Method:  | Precision 2_PyridineM        |
| Injection Volume: | 100,00 ul                 | Channel Name:       | Extract 275,0                |
| Run Time:         | 20,0 Minutes              | Proc. Chnl. Descr.: | PDA 275,0 nm, Smoothed by 25 |
| Acquired By:      | Roxana_Roman              |                     |                              |

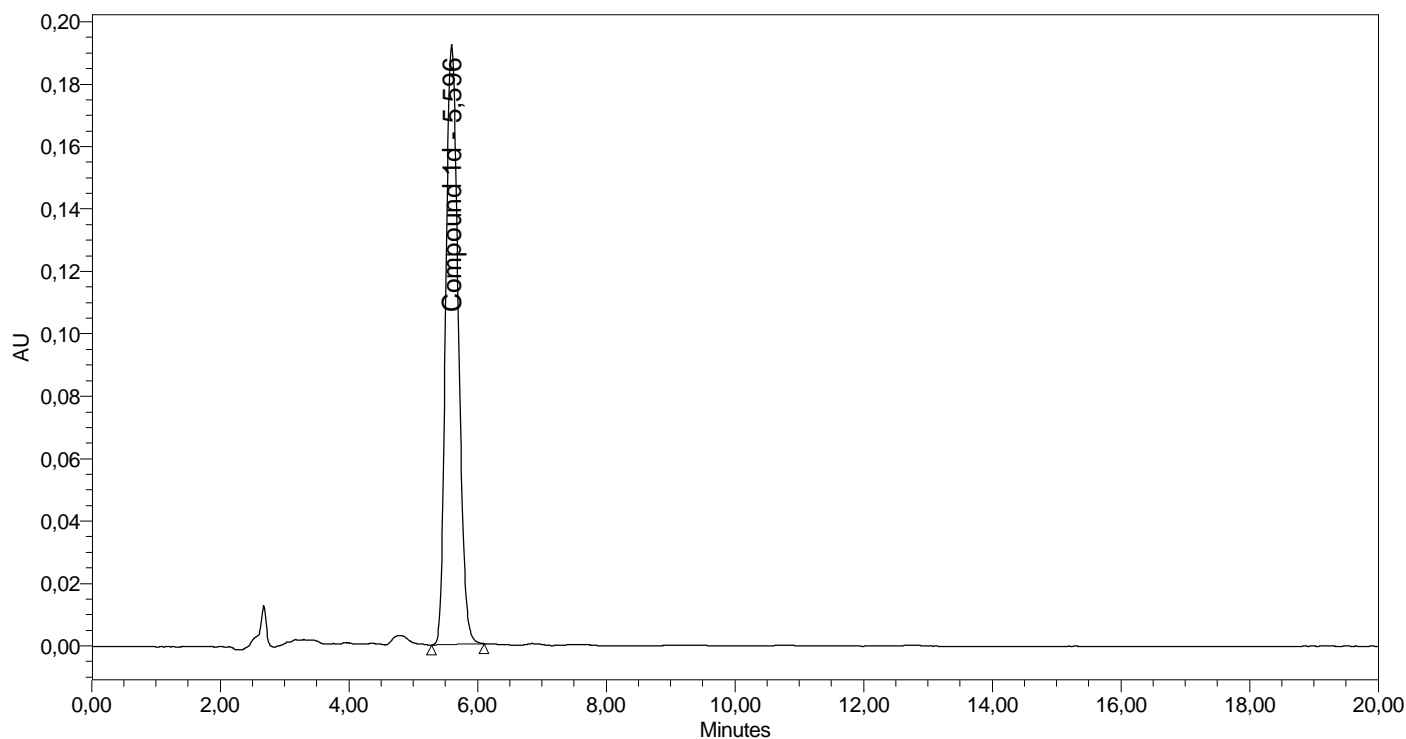

|   | Peak Name   | RT    | Area    | Height (μV) | Purity1 Angle | Purity1 Threshold | Purity1 Flag |
|---|-------------|-------|---------|-------------|---------------|-------------------|--------------|
| 1 | Compound 1d | 5,596 | 2614065 | 192238      | 0,212         | 0,282             | No           |

## Precision 2\_1d\_Report

Reported by User: Roxana Roman (Roxana\_Roman)  
 Acquisition Server: Waters7  
 Project Name: Test  
 Sample Set Name: Precision 2\_PyridineM  
 Code column: Inertsil ODS-3, 4,6\*250 mm, 5 um

### SAMPLE INFORMATION

|                   |                           |                     |                              |
|-------------------|---------------------------|---------------------|------------------------------|
| Sample Name:      | Methyl-pyridine 30 ug/ mL | Date Acquired:      | 15.06.2022 17:19:29          |
| Sample Type:      | Unknown                   | Acq. Method Set:    | Precision 2_PyridineM        |
| Vial:             | 33                        | Date Processed:     | 18.02.2023 09:49:42          |
| Injection #:      | 1                         | Processing Method:  | Precision 2_PyridineM        |
| Injection Volume: | 100,00 ul                 | Channel Name:       | Extract 275,0                |
| Run Time:         | 20,0 Minutes              | Proc. Chnl. Descr.: | PDA 275,0 nm, Smoothed by 25 |
| Acquired By:      | Roxana_Roman              |                     |                              |

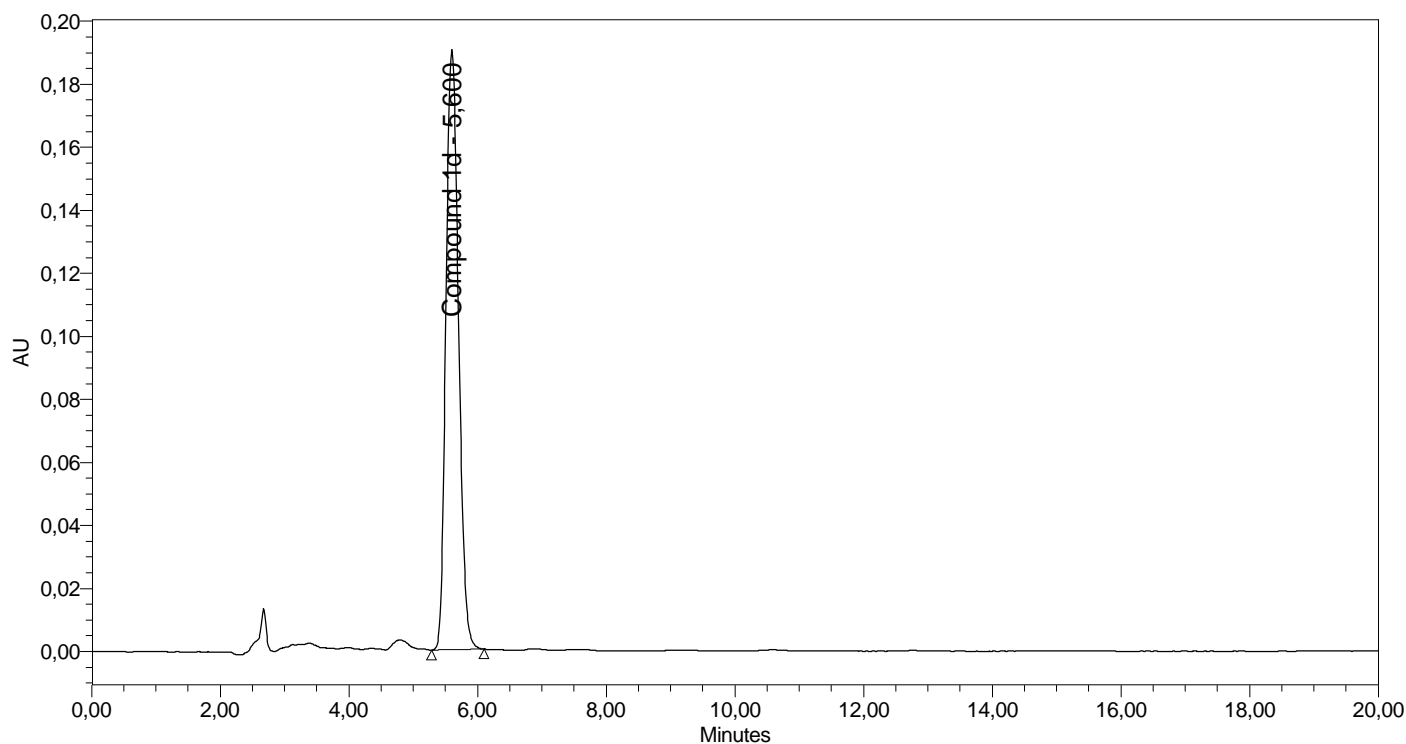

|   | Peak Name   | RT    | Area    | Height (μV) | Purity1 Angle | Purity1 Threshold | Purity1 Flag |
|---|-------------|-------|---------|-------------|---------------|-------------------|--------------|
| 1 | Compound 1d | 5,600 | 2594510 | 190263      | 0,194         | 0,284             | No           |

## Precision 2\_1d\_Report

Reported by User: Roxana Roman (Roxana\_Roman)  
 Acquisition Server: Waters7  
 Project Name: Test  
 Sample Set Name: Precision 2\_PyridineM  
 Code column: Inertsil ODS-3, 4,6\*250 mm, 5 um

### SAMPLE INFORMATION

|                   |                           |                     |                              |
|-------------------|---------------------------|---------------------|------------------------------|
| Sample Name:      | Methyl-pyridine 30 ug/ mL | Date Acquired:      | 15.06.2022 17:40:17          |
| Sample Type:      | Unknown                   | Acq. Method Set:    | Precision 2_PyridineM        |
| Vial:             | 34                        | Date Processed:     | 18.02.2023 09:49:50          |
| Injection #:      | 1                         | Processing Method:  | Precision 2_PyridineM        |
| Injection Volume: | 100,00 ul                 | Channel Name:       | Extract 275,0                |
| Run Time:         | 20,0 Minutes              | Proc. Chnl. Descr.: | PDA 275,0 nm, Smoothed by 25 |
| Acquired By:      | Roxana_Roman              |                     |                              |

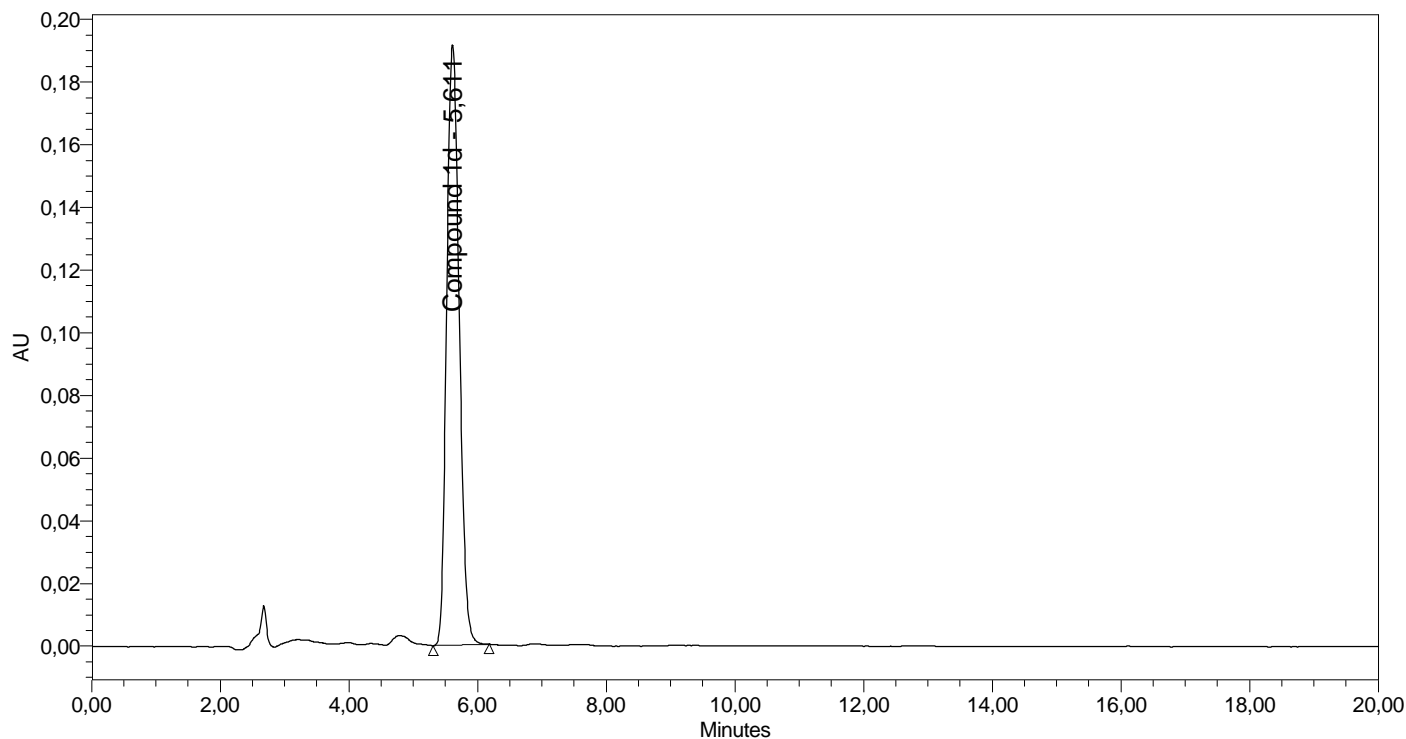

|   | Peak Name   | RT    | Area    | Height (μV) | Purity1 Angle | Purity1 Threshold | Purity1 Flag |
|---|-------------|-------|---------|-------------|---------------|-------------------|--------------|
| 1 | Compound 1d | 5,611 | 2607145 | 191537      | 0,242         | 0,287             | No           |

## Precision 2\_1d\_Report

Reported by User: Roxana Roman (Roxana\_Roman)  
 Acquisition Server: Waters7  
 Project Name: Test  
 Sample Set Name: Precision 2\_PyridineM  
 Code column: Inertsil ODS-3, 4,6\*250 mm, 5 um

### SAMPLE INFORMATION

|                   |                           |                     |                              |
|-------------------|---------------------------|---------------------|------------------------------|
| Sample Name:      | Methyl-pyridine 30 ug/ mL | Date Acquired:      | 15.06.2022 18:01:05          |
| Sample Type:      | Unknown                   | Acq. Method Set:    | Precision 2_PyridineM        |
| Vial:             | 35                        | Date Processed:     | 18.02.2023 09:49:56          |
| Injection #:      | 1                         | Processing Method:  | Precision 2_PyridineM        |
| Injection Volume: | 100,00 ul                 | Channel Name:       | Extract 275,0                |
| Run Time:         | 20,0 Minutes              | Proc. Chnl. Descr.: | PDA 275,0 nm, Smoothed by 25 |
| Acquired By:      | Roxana_Roman              |                     |                              |

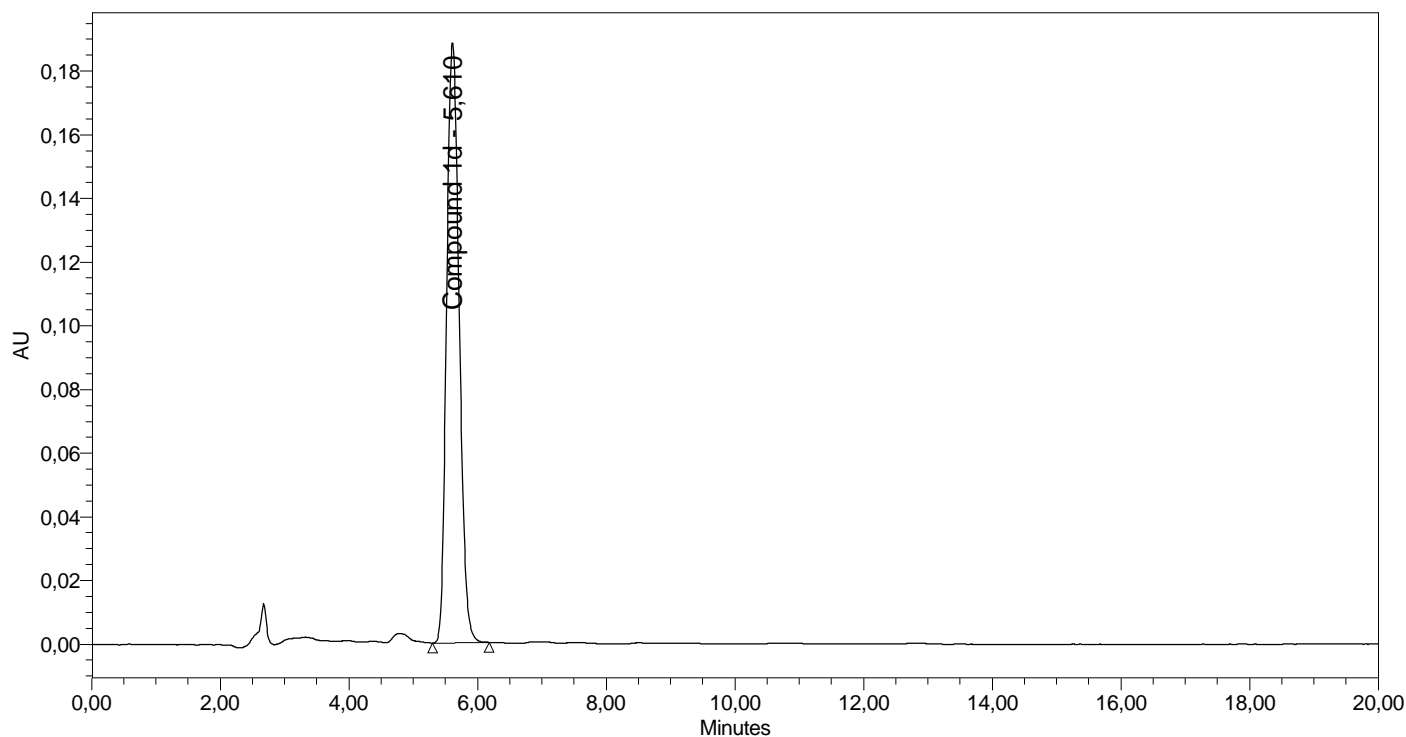

|   | Peak Name   | RT    | Area    | Height (μV) | Purity1 Angle | Purity1 Threshold | Purity1 Flag |
|---|-------------|-------|---------|-------------|---------------|-------------------|--------------|
| 1 | Compound 1d | 5,610 | 2564753 | 188442      | 0,242         | 0,294             | No           |

## Precision 2\_1d\_Report

Reported by User: Roxana Roman (Roxana\_Roman)  
 Acquisition Server: Waters7  
 Project Name: Test  
 Sample Set Name: Precision 2\_PyridineM  
 Code column: Inertsil ODS-3, 4,6\*250 mm, 5 um

### SAMPLE INFORMATION

|                   |                           |                     |                              |
|-------------------|---------------------------|---------------------|------------------------------|
| Sample Name:      | Methyl-pyridine 30 ug/ mL | Date Acquired:      | 15.06.2022 18:21:53          |
| Sample Type:      | Unknown                   | Acq. Method Set:    | Precision 2_PyridineM        |
| Vial:             | 36                        | Date Processed:     | 18.02.2023 09:50:03          |
| Injection #:      | 1                         | Processing Method:  | Precision 2_PyridineM        |
| Injection Volume: | 100,00 ul                 | Channel Name:       | Extract 275,0                |
| Run Time:         | 20,0 Minutes              | Proc. Chnl. Descr.: | PDA 275,0 nm, Smoothed by 25 |
| Acquired By:      | Roxana_Roman              |                     |                              |

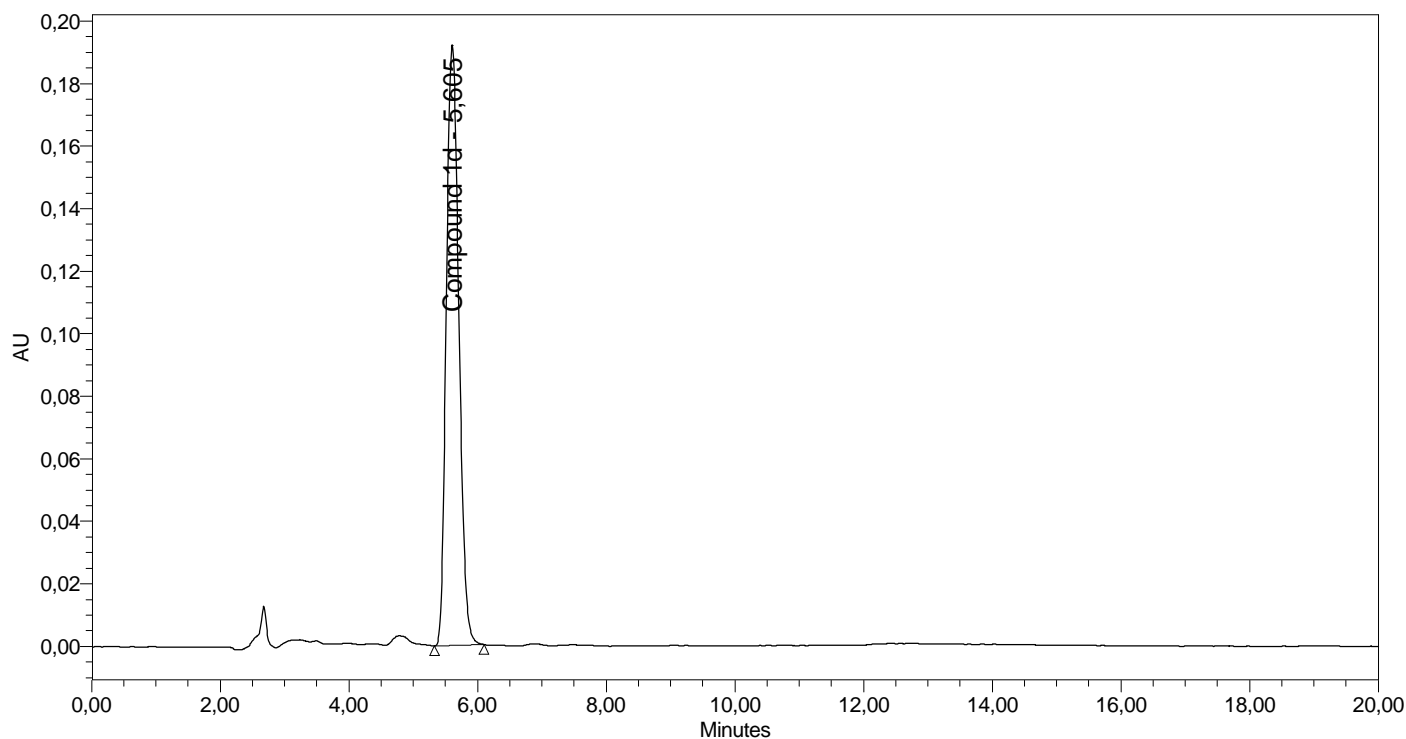

|   | Peak Name   | RT    | Area    | Height (μV) | Purity1 Angle | Purity1 Threshold | Purity1 Flag |
|---|-------------|-------|---------|-------------|---------------|-------------------|--------------|
| 1 | Compound 1d | 5,605 | 2603224 | 192151      | 0,191         | 0,284             | No           |



## Precision 2\_1d\_Report

Reported by User: Roxana Roman (Roxana\_Roman)  
 Acquisition Server: Waters7  
 Project Name: Test  
 Sample Set Name: Precision 2\_PyridineM  
 Code column: Inertsil ODS-3, 4,6\*250 mm, 5 um

### SAMPLE INFORMATION

|                   |                           |                     |                              |
|-------------------|---------------------------|---------------------|------------------------------|
| Sample Name:      | Methyl-pyridine 30 ug/ mL | Date Acquired:      | 15.06.2022 21:20:40          |
| Sample Type:      | Unknown                   | Acq. Method Set:    | Precision 2_PyridineM        |
| Vial:             | 37                        | Date Processed:     | 18.02.2023 09:50:16          |
| Injection #:      | 1                         | Processing Method:  | Precision 2_PyridineM        |
| Injection Volume: | 100,00 ul                 | Channel Name:       | Extract 275,0                |
| Run Time:         | 20,0 Minutes              | Proc. Chnl. Descr.: | PDA 275,0 nm, Smoothed by 25 |
| Acquired By:      | Roxana_Roman              |                     |                              |

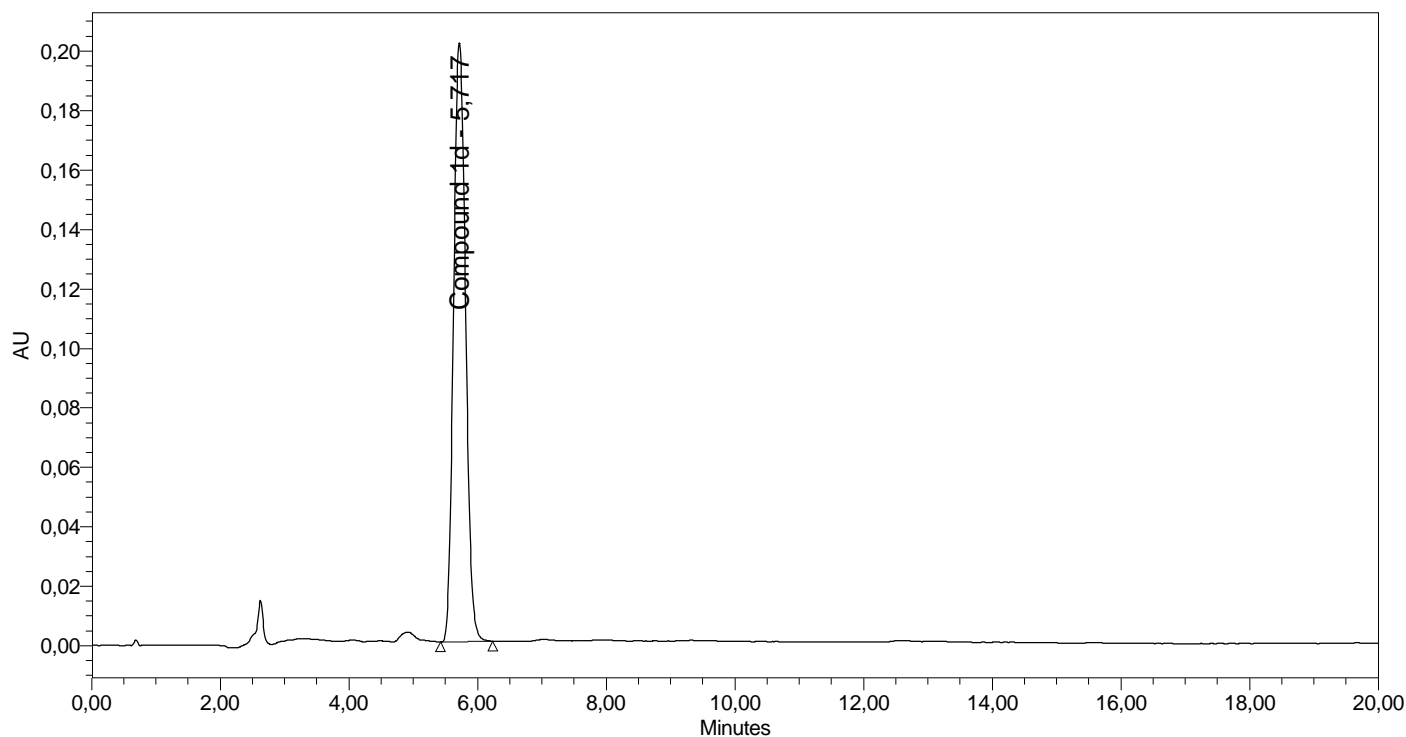

|   | Peak Name   | RT    | Area    | Height (μV) | Purity1 Angle | Purity1 Threshold | Purity1 Flag |
|---|-------------|-------|---------|-------------|---------------|-------------------|--------------|
| 1 | Compound 1d | 5,717 | 2617823 | 201379      | 0,126         | 0,578             | No           |

## Precision 2\_1d\_Report

Reported by User: Roxana Roman (Roxana\_Roman)  
 Acquisition Server: Waters7  
 Project Name: Test  
 Sample Set Name: Precision 2\_PyridineM  
 Code column: Inertsil ODS-3, 4,6\*250 mm, 5 um

### SAMPLE INFORMATION

|                   |                           |                     |                              |
|-------------------|---------------------------|---------------------|------------------------------|
| Sample Name:      | Methyl-pyridine 40 ug/ mL | Date Acquired:      | 15.06.2022 19:03:29          |
| Sample Type:      | Unknown                   | Acq. Method Set:    | Precision 2_PyridineM        |
| Vial:             | 38                        | Date Processed:     | 18.02.2023 09:52:20          |
| Injection #:      | 1                         | Processing Method:  | Precision 2_PyridineM        |
| Injection Volume: | 100,00 ul                 | Channel Name:       | Extract 275,0                |
| Run Time:         | 20,0 Minutes              | Proc. Chnl. Descr.: | PDA 275,0 nm, Smoothed by 25 |
| Acquired By:      | Roxana_Roman              |                     |                              |

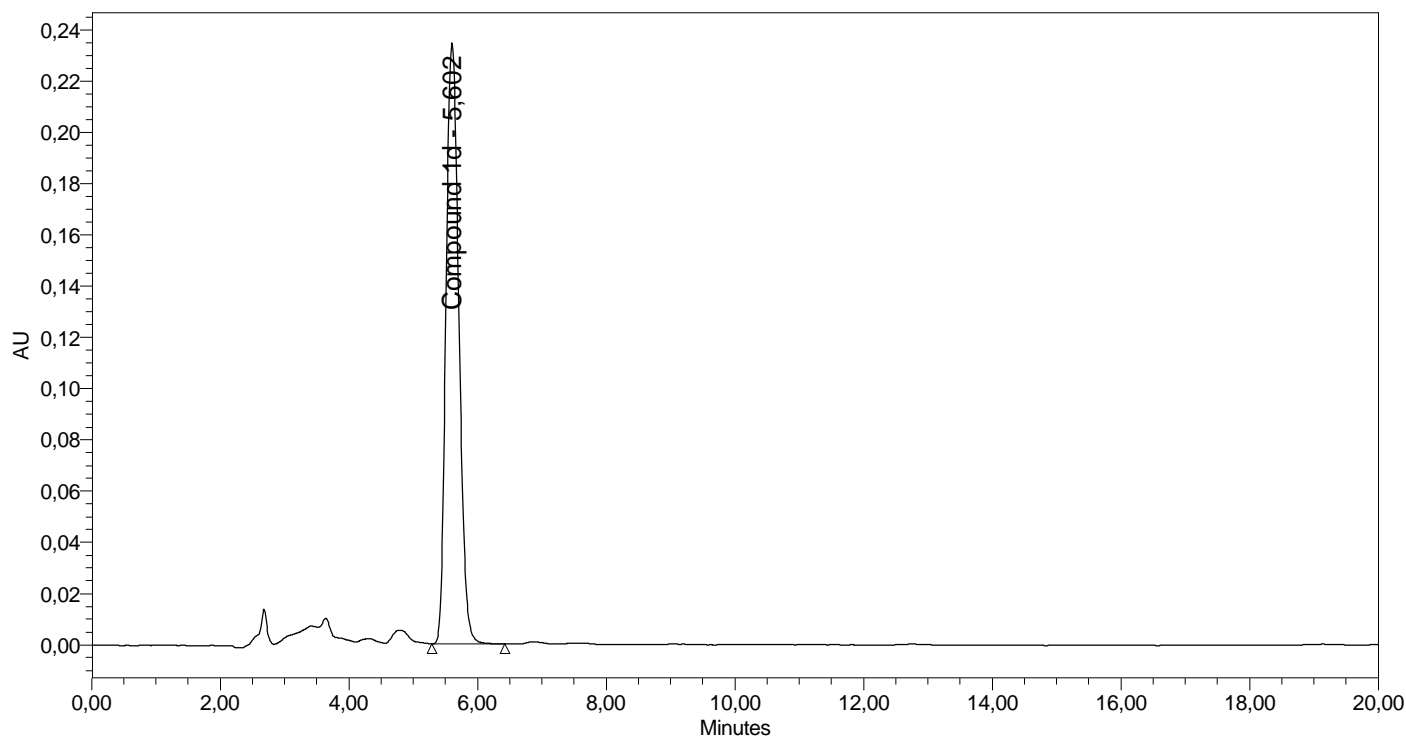

|   | Peak Name   | RT    | Area    | Height (μV) | Purity1 Angle | Purity1 Threshold | Purity1 Flag |
|---|-------------|-------|---------|-------------|---------------|-------------------|--------------|
| 1 | Compound 1d | 5,602 | 3259885 | 234623      | 0,279         | 0,294             | No           |

## Precision 2\_1d\_Report

Reported by User: Roxana Roman (Roxana\_Roman)  
 Acquisition Server: Waters7  
 Project Name: Test  
 Sample Set Name: Precision 2\_PyridineM  
 Code column: Inertsil ODS-3, 4,6\*250 mm, 5 um

### SAMPLE INFORMATION

|                   |                           |                     |                              |
|-------------------|---------------------------|---------------------|------------------------------|
| Sample Name:      | Methyl-pyridine 40 ug/ mL | Date Acquired:      | 15.06.2022 19:24:17          |
| Sample Type:      | Unknown                   | Acq. Method Set:    | Precision 2_PyridineM        |
| Vial:             | 39                        | Date Processed:     | 18.02.2023 09:52:33          |
| Injection #:      | 1                         | Processing Method:  | Precision 2_PyridineM        |
| Injection Volume: | 100,00 ul                 | Channel Name:       | Extract 275,0                |
| Run Time:         | 20,0 Minutes              | Proc. Chnl. Descr.: | PDA 275,0 nm, Smoothed by 25 |
| Acquired By:      | Roxana_Roman              |                     |                              |

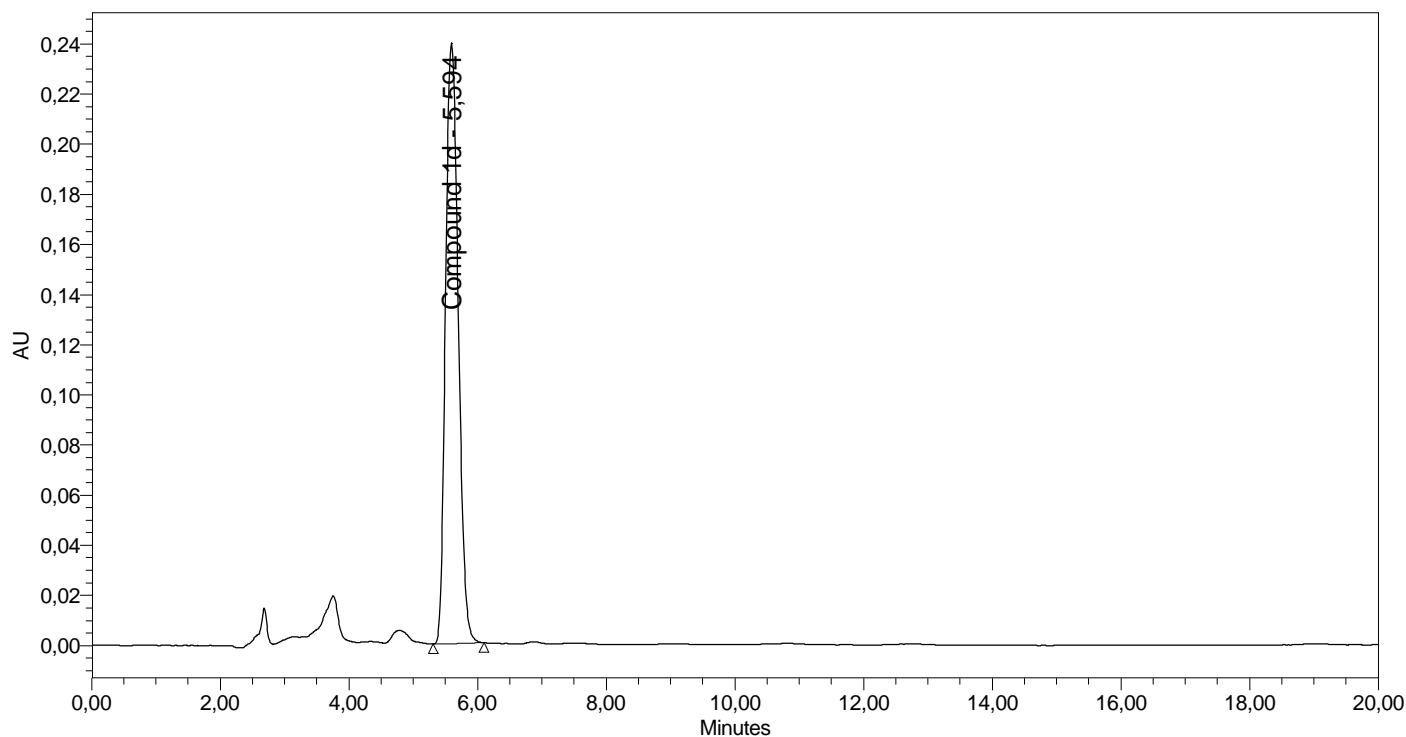

|   | Peak Name   | RT    | Area    | Height (μV) | Purity1 Angle | Purity1 Threshold | Purity1 Flag |
|---|-------------|-------|---------|-------------|---------------|-------------------|--------------|
| 1 | Compound 1d | 5,594 | 3293681 | 239713      | 0,183         | 0,289             | No           |

## Precision 2\_1d\_Report

Reported by User: Roxana Roman (Roxana\_Roman)  
 Acquisition Server: Waters7  
 Project Name: Test  
 Sample Set Name: Precision 2\_PyridineM  
 Code column: Inertsil ODS-3, 4,6\*250 mm, 5 um

### SAMPLE INFORMATION

|                   |                           |                     |                              |
|-------------------|---------------------------|---------------------|------------------------------|
| Sample Name:      | Methyl-pyridine 40 ug/ mL | Date Acquired:      | 15.06.2022 19:45:05          |
| Sample Type:      | Unknown                   | Acq. Method Set:    | Precision 2_PyridineM        |
| Vial:             | 40                        | Date Processed:     | 18.02.2023 09:52:49          |
| Injection #:      | 1                         | Processing Method:  | Precision 2_PyridineM        |
| Injection Volume: | 100,00 ul                 | Channel Name:       | Extract 275,0                |
| Run Time:         | 20,0 Minutes              | Proc. Chnl. Descr.: | PDA 275,0 nm, Smoothed by 25 |
| Acquired By:      | Roxana_Roman              |                     |                              |

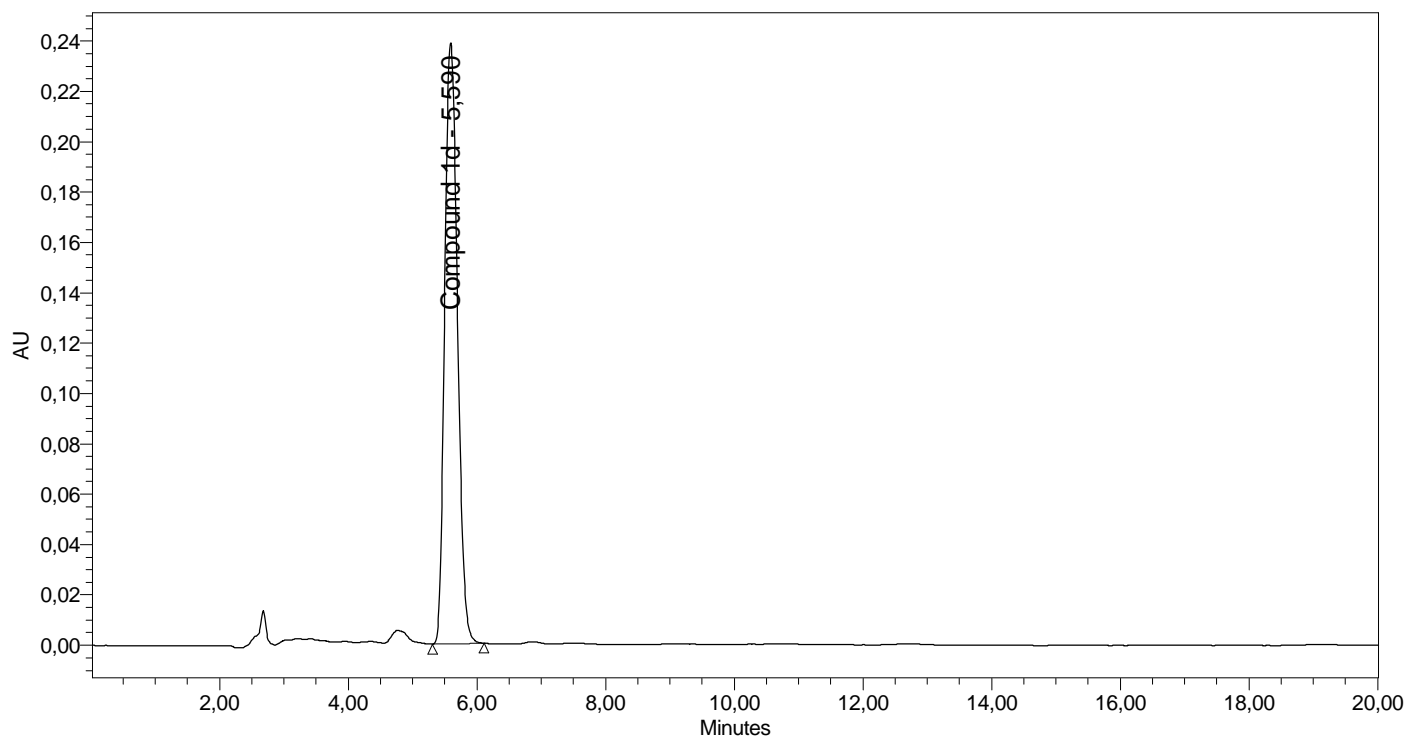

|   | Peak Name   | RT    | Area    | Height (μV) | Purity1 Angle | Purity1 Threshold | Purity1 Flag |
|---|-------------|-------|---------|-------------|---------------|-------------------|--------------|
| 1 | Compound 1d | 5,590 | 3297946 | 238693      | 0,182         | 0,287             | No           |

## Precision 2\_1d\_Report

Reported by User: Roxana Roman (Roxana\_Roman)  
 Acquisition Server: Waters7  
 Project Name: Test  
 Sample Set Name: Precision 2\_PyridineM  
 Code column: Inertsil ODS-3, 4,6\*250 mm, 5 um

### SAMPLE INFORMATION

|                   |                           |                     |                              |
|-------------------|---------------------------|---------------------|------------------------------|
| Sample Name:      | Methyl-pyridine 40 ug/ mL | Date Acquired:      | 15.06.2022 20:05:53          |
| Sample Type:      | Unknown                   | Acq. Method Set:    | Precision 2_PyridineM        |
| Vial:             | 41                        | Date Processed:     | 18.02.2023 09:53:01          |
| Injection #:      | 1                         | Processing Method:  | Precision 2_PyridineM        |
| Injection Volume: | 100,00 ul                 | Channel Name:       | Extract 275,0                |
| Run Time:         | 20,0 Minutes              | Proc. Chnl. Descr.: | PDA 275,0 nm, Smoothed by 25 |
| Acquired By:      | Roxana_Roman              |                     |                              |

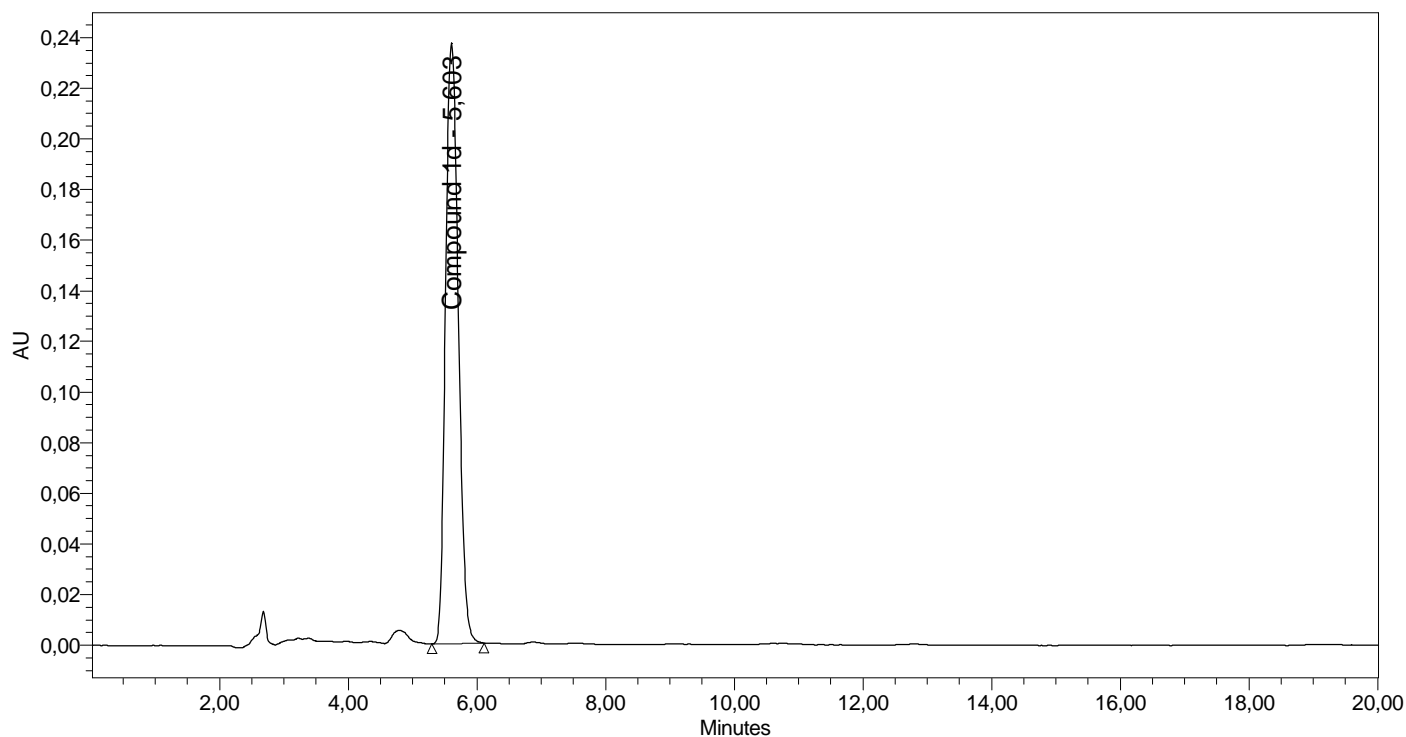

|   | Peak Name   | RT    | Area    | Height (μV) | Purity1 Angle | Purity1 Threshold | Purity1 Flag |
|---|-------------|-------|---------|-------------|---------------|-------------------|--------------|
| 1 | Compound 1d | 5,603 | 3291424 | 237363      | 0,173         | 0,287             | No           |

## Precision 2\_1d\_Report

Reported by User: Roxana Roman (Roxana\_Roman)  
 Acquisition Server: Waters7  
 Project Name: Test  
 Sample Set Name: Precision 2\_PyridineM  
 Code column: Inertsil ODS-3, 4,6\*250 mm, 5 um

### SAMPLE INFORMATION

|                   |                           |                     |                              |
|-------------------|---------------------------|---------------------|------------------------------|
| Sample Name:      | Methyl-pyridine 40 ug/ mL | Date Acquired:      | 15.06.2022 20:26:41          |
| Sample Type:      | Unknown                   | Acq. Method Set:    | Precision 2_PyridineM        |
| Vial:             | 42                        | Date Processed:     | 18.02.2023 09:53:15          |
| Injection #:      | 1                         | Processing Method:  | Precision 2_PyridineM        |
| Injection Volume: | 100,00 ul                 | Channel Name:       | Extract 275,0                |
| Run Time:         | 20,0 Minutes              | Proc. Chnl. Descr.: | PDA 275,0 nm, Smoothed by 25 |
| Acquired By:      | Roxana_Roman              |                     |                              |

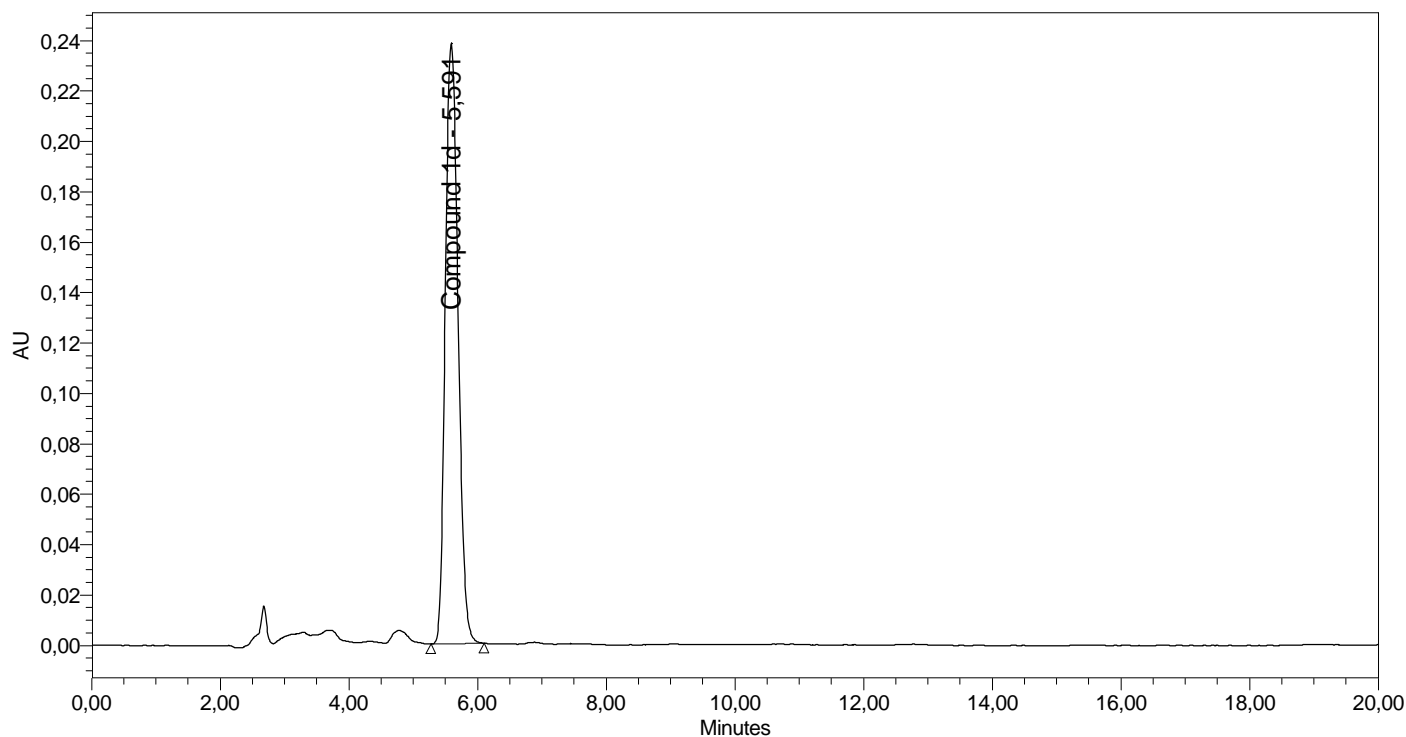

|   | Peak Name   | RT    | Area    | Height (μV) | Purity1 Angle | Purity1 Threshold | Purity1 Flag |
|---|-------------|-------|---------|-------------|---------------|-------------------|--------------|
| 1 | Compound 1d | 5,591 | 3297122 | 238413      | 0,182         | 0,287             | No           |

## Precision 2\_1d\_Report

Reported by User: Roxana Roman (Roxana\_Roman)  
 Acquisition Server: Waters7  
 Project Name: Test  
 Sample Set Name: Precision 2\_PyridineM  
 Code column: Inertsil ODS-3, 4,6\*250 mm, 5 um

### SAMPLE INFORMATION

|                   |                           |                     |                              |
|-------------------|---------------------------|---------------------|------------------------------|
| Sample Name:      | Methyl-pyridine 40 ug/ mL | Date Acquired:      | 15.06.2022 20:47:29          |
| Sample Type:      | Unknown                   | Acq. Method Set:    | Precision 2_PyridineM        |
| Vial:             | 43                        | Date Processed:     | 18.02.2023 09:53:33          |
| Injection #:      | 1                         | Processing Method:  | Precision 2_PyridineM        |
| Injection Volume: | 100,00 ul                 | Channel Name:       | Extract 275,0                |
| Run Time:         | 20,0 Minutes              | Proc. Chnl. Descr.: | PDA 275,0 nm, Smoothed by 25 |
| Acquired By:      | Roxana_Roman              |                     |                              |

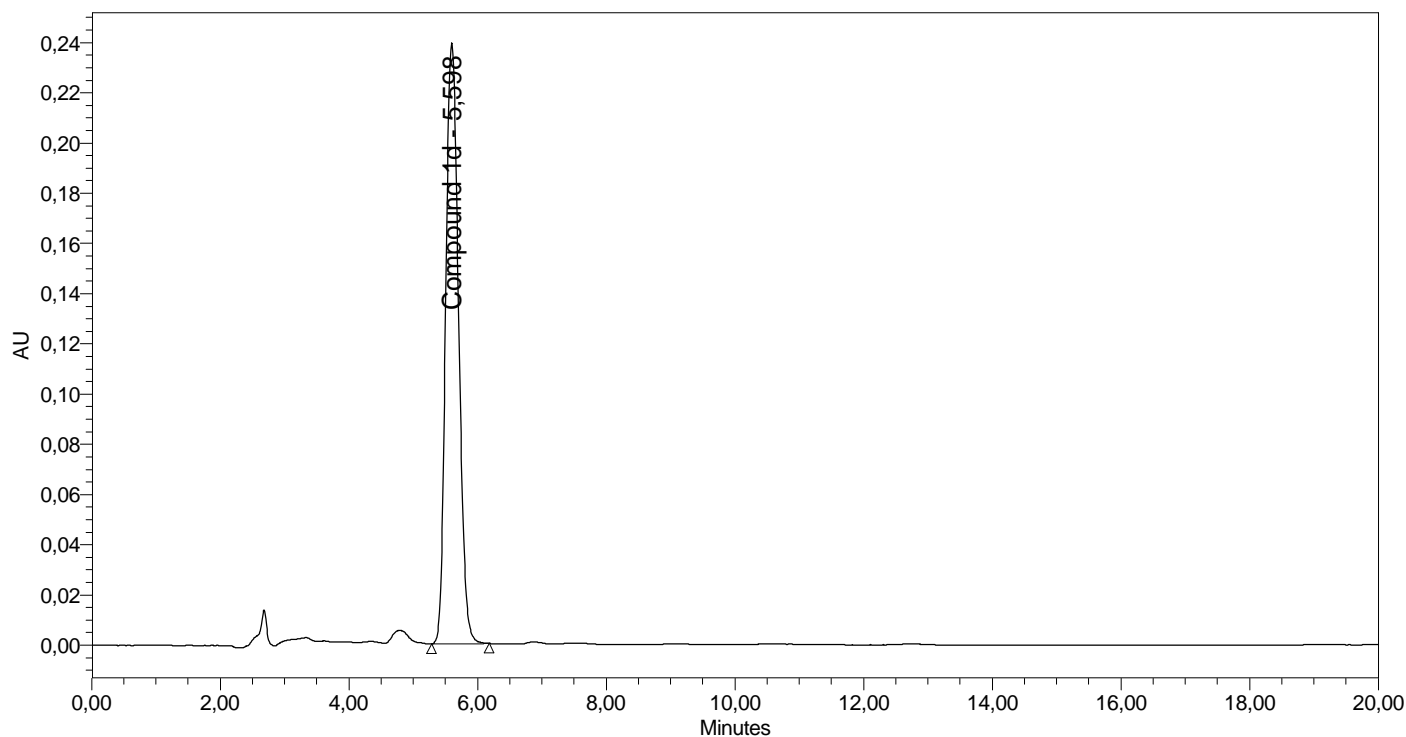

|   | Peak Name   | RT    | Area    | Height (μV) | Purity1 Angle | Purity1 Threshold | Purity1 Flag |
|---|-------------|-------|---------|-------------|---------------|-------------------|--------------|
| 1 | Compound 1d | 5,598 | 3328312 | 239372      | 0,245         | 0,290             | No           |
